# Supplementary material for: A Novel Defined Super-Enhancer Associated Gene Signature to Predict Prognosis in Patients With Diffuse Large B-Cell Lymphoma
Source: Front Genet. 2022 Jun 14;13:827840. doi: 10.3389/fgene.2022.827840 (PMC9237400; doi:10.3389/fgene.2022.827840)
Supplement: Supplementary file 1 [file Table1.XLSX]

## Sheet: Supplementary Table S1
Supplementary Table S1. The Clinical Characteristics of the DLBCL Patients from 3 Independent Datasets.
	GSE31312 (n=470)				GSE10846 (n=414)				GSE87371 (n=221)
Variables	N(%)	Risk score		p-value	N(%)	Risk score		p-value	N(%)	Risk score		p-value
		Low	High			Low	High			Low	High
Age,n(%)
>60	270	185	85	0.005**	226	144	82	0.005**	106	64	42	0.248
≤60	200	160	40		188	144	44		115	78	37
Gender,n(%)
Male	271	204	67	0.284	224	157	67	0.726	116	71	45	0.321
Female	199	141	58		172	120	52		105	71	34
NA					18	11	7
Subtype,n(%)
ABC	199	130	69	0.002**	167	87	80	<0.001***	83	41	42	0.004**
GCB	227	182	45		183	149	34		84	63	21
UC	44	33	11		64	52	12		34	22	11
PBML									20	15	5
Stage,n(%)
I	124	104	20	0.002**	66	52	14	0.001**	29	23	6	0.325
II	96	72	24		122	95	27		42	27	15
III	101	71	30		97	70	27		35	22	13
IV	128	80	48		121	67	54		115	70	45
NA	21	18	3		8	4	4
IPI score,n(%)
>2	150	90	60	<0.001***					102	57	45	0.016*
≤2	274	218	56						119	85	34
NA	46	37	9
ECOG,n(%)
≥2	96	67	29	0.369	93	58	35	0.087
<2	374	278	96		296	209	87
NA					25	21	4
Extranodal sites,n(%)
≥2	104	62	42	<0.001***	30	19	11	0.304
<2	366	283	83		353	244	109
NA					31	25	6
*p < 0.05, **p < 0.01, and ***p < 0.001. Bold values indicate statistical significance p < 0.05.

## Sheet: Supplementary Table S2
Supplementary Table S2. SEs of OCI-LY1.
ID	chromsome	start	end	Number_of_peaks_stitched	size_of_peaks_stitched	H3K27Ac_signal	input_signal	OVERLAP_GENES	PROXIMAL_GENES	CLOSEST_GENE	SuperEnhancer_Rank	is.super
7_MACS_peak_5291_lociStitched	chr11	111214610	111322309	7	105315	910617	47376.8	POU2AF1	C11orf93,C11orf92	POU2AF1	1	1
7_MACS_peak_21222_lociStitched	chr3	187606861	187725246	7	106315	761997	41825.4			BCL6	2	1
18_MACS_peak_13277_lociStitched	chr18	53069662	53257843	18	160140	522108	51787.4	TCF4	TCF4	TCF4	3	1
8_MACS_peak_16006_lociStitched	chr2	87754939	87847520	8	53937	448453	26978.1	NCRNA00152	NCRNA00152	NCRNA00152	4	1
8_MACS_peak_16302_lociStitched	chr2	112170867	112252686	8	57247	444457	25102.1	LOC541471		LOC541471	5	1
9_MACS_peak_23364_lociStitched	chr5	123980016	124092244	9	99052	376705	24678.9	ZNF608		ZNF608	6	1
17_MACS_peak_21190_lociStitched	chr3	186647464	186792167	17	99566	370816	37362.3	ST6GAL1	ST6GAL1	ST6GAL1	7	1
23_MACS_peak_12340_lociStitched	chr17	55475950	55639766	23	142505	354088	22393.6	MSI2		MSI2	8	1
9_MACS_peak_2368_lociStitched	chr1	198564715	198671046	9	88634	321630	23828.8	PTPRC		PTPRC	9	1
10_MACS_peak_2429_lociStitched	chr1	203236278	203310877	10	66888	307713	13599.4	BTG2,FMOD,LOC730227	CHIT1,LOC730227	LOC730227	10	1
22_MACS_peak_19877_lociStitched	chr3	31886636	32025058	22	115391	316211	23864	ZNF860,OSBPL10		ZNF860	11	1
15_MACS_peak_26875_lociStitched	chr7	105649796	105759096	15	81893	314576	25499.7	SYPL1,CDHR3		SYPL1	12	1
6_MACS_peak_8794_lociStitched	chr14	106023024	106072278	6	45659	297711	9392.74		TMEM121	TMEM121	13	1
6_MACS_peak_18822_lociStitched	chr22	23182400	23298814	6	104078	301675	15075.6	IGLL5	MIR650	IGLL5	14	1
8_MACS_peak_16046_lociStitched	chr2	89127472	89198113	8	53103	286852	10822.2			ANKRD36BP2	15	1
15_MACS_peak_21700_lociStitched	chr4	40151395	40268478	15	82027	273213	19541.2	N4BP2,RHOH		RHOH	16	1
17_MACS_peak_19757_lociStitched	chr3	16411022	16571531	17	122003	276685	26692.6	RFTN1		RFTN1	17	1
18_MACS_peak_4106_lociStitched	chr10	126211345	126341711	18	88341	259754	15370.2	FAM53B,LHPP		LHPP	18	1
13_MACS_peak_26188_lociStitched	chr7	43621281	43741256	13	80889	267952	25614.7	STK17A,C7orf44		STK17A	19	1
9_MACS_peak_7827_lociStitched	chr14	22937455	23004513	9	66047	251166	13277.5			DAD1	20	1
5_MACS_peak_12725_lociStitched	chr17	75422530	75491826	5	57384	246590	10332	SEPT9	MIR4316	SEPT9	21	1
4_MACS_peak_7345_lociStitched	chr13	41534094	41596249	4	60779	256458	24265.3	ELF1	WBP4,SUGT1P3	ELF1	22	1
29_MACS_peak_2952_lociStitched	chr10	529908	684723	29	96313	245072	18237.2	DIP2C	C10orf108	C10orf108	23	1
12_MACS_peak_2709_lociStitched	chr1	226819953	226937809	12	97225	245683	19304.8	ITPKB		ITPKB	24	1
10_MACS_peak_15215_lociStitched	chr2	12169337	12272718	10	71417	241850	16168.8			MIR4262	25	1
12_MACS_peak_8854_lociStitched	chr14	107149891	107263581	12	62202	252733	30446.2			NCRNA00221	26	1
5_MACS_peak_3429_lociStitched	chr10	62093808	62152400	5	57393	234561	12491.8	ANK3		ANK3	27	1
22_MACS_peak_10274_lociStitched	chr16	12307062	12451614	22	95644	239537	19138.7	SNX29		SNX29	28	1
23_MACS_peak_16905_lociStitched	chr2	197014120	197142249	23	88110	237039	20154.7	STK17B,HECW2		STK17B	29	1
21_MACS_peak_7328_lociStitched	chr13	41099422	41281166	21	103288	252988	37784.6	FOXO1	LOC646982,MIR320D1	FOXO1	30	1
7_MACS_peak_16478_lociStitched	chr2	134974519	135073637	7	71427	231966	17603.4	MGAT5		MGAT5	31	1
10_MACS_peak_23303_lociStitched	chr5	118603634	118704758	10	88065	231534	17363	TNFAIP8		TNFAIP8	32	1
25_MACS_peak_25156_lociStitched	chr6	107056014	107213601	25	87315	230124	21227	LOC100422737,RTN4IP1,QRSL1		QRSL1	33	1
14_MACS_peak_15784_lociStitched	chr2	65571143	65666232	14	82033	223725	16488.4	SPRED2		SPRED2	34	1
14_MACS_peak_26085_lociStitched	chr7	30198366	30327019	14	76570	225915	23607.8	C7orf41,ZNRF2	MIR550A1,MIR550B1	ZNRF2	35	1
9_MACS_peak_27839_lociStitched	chr8	59924602	60033707	9	84272	225607	24297.7	TOX		TOX	36	1
14_MACS_peak_8806_lociStitched	chr14	106143499	106209664	14	44157	208248	7211.98			TMEM121	37	1
5_MACS_peak_25499_lociStitched	chr6	150919139	150980795	5	52244	213934	13373.2	PLEKHG1		PLEKHG1	38	1
5_MACS_peak_25102_lociStitched	chr6	90983354	91039944	5	49179	210922	11510.4	BACH2		BACH2	39	1
27_MACS_peak_18002_lociStitched	chr20	46012297	46138998	27	84984	209982	14862	NCOA3	NCOA3,ZMYND8	NCOA3	40	1
18_MACS_peak_28352_lociStitched	chr8	130983513	131107586	18	69870	207723	16700.2	ASAP1	FAM49B	FAM49B	41	1
11_MACS_peak_298_lociStitched	chr1	14011901	14091409	11	60919	204717	15114.5	PRDM2		PRDM2	42	1
MACS_peak_7670	chr13	99970976	100001879	1	30904	199222	11443.4	UBAC2	MIR623,FKSG29,GPR183	FKSG29	43	1
15_MACS_peak_20415_lociStitched	chr3	71535720	71635865	15	65028	202854	16634.1	MIR1284,FOXP1		MIR1284	44	1
18_MACS_peak_23847_lociStitched	chr5	158272434	158413938	18	99741	208110	23588.7	EBF1		EBF1	45	1
19_MACS_peak_11013_lociStitched	chr16	81803440	81908683	19	81491	197310	15260.2	PLCG2		PLCG2	46	1
8_MACS_peak_1634_lociStitched	chr1	145127968	145184852	8	45741	208622	26690		SEC22B,NOTCH2NL	NOTCH2NL	47	1
10_MACS_peak_21132_lociStitched	chr3	183220239	183279244	10	52557	197295	15412.1	KLHL6		KLHL6	48	1
17_MACS_peak_13308_lociStitched	chr18	56528534	56643850	17	61989	203440	22013.8	ZNF532		ZNF532	49	1
25_MACS_peak_4610_lociStitched	chr11	48000812	48132698	25	100502	199952	19031.1	PTPRJ		PTPRJ	50	1
1_MACS_peak_6355_lociStitched	chr12	57603576	57638314	1	34739	186359	9476.53	SHMT2,STAC3,NDUFA4L2,NXPH4,LRP1	SHMT2,MIR1228	SHMT2	51	1
5_MACS_peak_20988_lociStitched	chr3	169647230	169698362	5	40085	190906	15539	LOC100128164,SEC62,SAMD7		LOC100128164	52	1
4_MACS_peak_28894_lociStitched	chr9	37280389	37343544	4	49932	187488	12668.9	ZCCHC7		GRHPR	53	1
8_MACS_peak_26330_lociStitched	chr7	55567913	55642621	8	68441	191036	18408.1	VOPP1		VOPP1	54	1
7_MACS_peak_29283_lociStitched	chr9	112665737	112737880	7	49119	184217	11809.8	PALM2,PALM2-AKAP2		AKAP2	55	1
3_MACS_peak_9415_lociStitched	chr15	66439393	66484288	3	44550	175319	7901.52	MEGF11		MEGF11	56	1
8_MACS_peak_1597_lociStitched	chr1	120634784	120687538	8	43665	191291	24398.7		NOTCH2	NOTCH2	57	1
12_MACS_peak_13355_lociStitched	chr18	60793423	60881508	12	60668	176443	12499.3	BCL2		BCL2	58	1
12_MACS_peak_28904_lociStitched	chr9	37362299	37433364	12	63459	172276	10787.7	GRHPR	ZBTB5	GRHPR	59	1
20_MACS_peak_18114_lociStitched	chr20	52194578	52305877	20	59205	177489	16249.7	ZNF217		ZNF217	60	1
7_MACS_peak_7722_lociStitched	chr13	111804925	111869905	7	46187	176245	17369.2	ARHGEF7	ARHGEF7	ARHGEF7	61	1
3_MACS_peak_26009_lociStitched	chr7	24851889	24892309	3	34486	167011	10206	OSBPL3		DFNA5	62	1
5_MACS_peak_8595_lociStitched	chr14	94405926	94469011	5	40008	162009	7015.05	C14orf48,ASB2	OTUB2,FAM181A,C14orf86	ASB2	63	1
6_MACS_peak_6804_lociStitched	chr12	113486066	113548179	6	55656	163264	9062.29	RASAL1,DTX1	RASAL1,CCDC42B	DTX1	64	1
10_MACS_peak_2205_lociStitched	chr1	178530312	178588990	10	44122	162327	8520.05		C1orf220,C1orf49	C1orf220	65	1
17_MACS_peak_16623_lociStitched	chr2	158259858	158366019	17	57815	167915	16221.4	CYTIP		CYTIP	66	1
10_MACS_peak_5094_lociStitched	chr11	76298940	76392633	10	53258	166942	16583.7	GUCY2E,LRRC32		LRRC32	67	1
7_MACS_peak_20888_lociStitched	chr3	151941277	152022461	7	57272	176462	27237.2	MBNL1,LOC401093	MBNL1,TMEM14E	MBNL1	68	1
6_MACS_peak_21076_lociStitched	chr3	179641103	179692659	6	38627	166222	17003.2	PEX5L		PEX5L	69	1
9_MACS_peak_8233_lociStitched	chr14	64635418	64706815	9	49474	158923	10295.4	SYNE2,ESR2		SYNE2	70	1
2_MACS_peak_17070_lociStitched	chr2	214089739	214116701	2	25305	155282	6840.26		SPAG16	SPAG16	71	1
11_MACS_peak_18146_lociStitched	chr20	52504838	52566516	11	47451	157809	9819.14	BCAS1	SUMO1P1	SUMO1P1	72	1
10_MACS_peak_29454_lociStitched	chr9	124642167	124721691	10	48914	158213	11228.8	TTLL11		TTLL11	73	1
12_MACS_peak_3033_lociStitched	chr10	6078580	6152020	12	51519	158014	11118.8	RBM17,IL2RA	PFKFB3,MIR3155	IL2RA	74	1
12_MACS_peak_13445_lociStitched	chr18	77195510	77289402	12	48854	152631	9351.64	NFATC1	NFATC1	NFATC1	75	1
10_MACS_peak_8984_lociStitched	chr15	40336303	40409644	10	52245	152447	9218.96	BMF	SRP14,BUB1B,BMF	BMF	76	1
9_MACS_peak_18483_lociStitched	chr21	43248063	43316820	9	38524	151774	8904.03	C2CD2,PRDM15		PRDM15	77	1
13_MACS_peak_2930_lociStitched	chr10	334165	418283	13	56630	153339	10674.6	DIP2C		ZMYND11	78	1
15_MACS_peak_29692_lociStitched	chr9	134520171	134620333	15	72001	157435	15124.5	RAPGEF1		RAPGEF1	79	1
6_MACS_peak_29082_lociStitched	chr9	93531258	93602273	6	39858	152043	10290.1	SYK	SYK	SYK	80	1
11_MACS_peak_15824_lociStitched	chr2	68941742	69037867	11	55089	156222	14697.5	ARHGAP25	ARHGAP25	ARHGAP25	81	1
6_MACS_peak_27317_lociStitched	chr7	155501737	155561468	6	46626	155970	14699.8	RBM33	SHH	SHH	82	1
2_MACS_peak_5542_lociStitched	chr11	128471324	128501591	2	29787	146886	5938.39		ETS1	ETS1	83	1
10_MACS_peak_26441_lociStitched	chr7	69086737	69169316	10	65390	161582	20966.8	AUTS2		AUTS2	84	1
5_MACS_peak_7519_lociStitched	chr13	52355075	52409176	5	37489	151997	12015.8	NCRNA00282,DHRS12	CCDC70	DHRS12	85	1
8_MACS_peak_19395_lociStitched	chr22	46121881	46187418	8	46404	149798	10800.5	ATXN10		ATXN10	86	1
18_MACS_peak_18832_lociStitched	chr22	23516059	23624561	18	70679	152467	13964.2	FBXW4P1,BCR	RAB36,RTDR1,BCR	FBXW4P1	87	1
4_MACS_peak_19929_lociStitched	chr3	35694012	35733880	4	33151	146722	9046.05	ARPP21		ARPP21	88	1
7_MACS_peak_22336_lociStitched	chr4	146401294	146474241	7	49511	151387	13735.9	SMAD1		SMAD1	89	1
3_MACS_peak_13026_lociStitched	chr18	13605381	13630604	3	21078	147898	12190.3	C18orf1	C18orf1	C18orf1	90	1
12_MACS_peak_17837_lociStitched	chr20	37432586	37523471	12	56994	146897	11660.5	PPP1R16B	FAM83D	PPP1R16B	91	1
4_MACS_peak_16705_lociStitched	chr2	170993674	171040614	4	33795	142608	7477.54	MYO3B	MYO3B	MYO3B	92	1
9_MACS_peak_27910_lociStitched	chr8	66892495	66953905	9	44127	144621	9684.36	DNAJC5B		DNAJC5B	93	1
8_MACS_peak_21718_lociStitched	chr4	40282003	40328213	8	35272	139642	6626.51		CHRNA9	CHRNA9	94	1
8_MACS_peak_25107_lociStitched	chr6	91058940	91135675	8	40277	144377	11717.4			BACH2	95	1
20_MACS_peak_462_lociStitched	chr1	23873313	23964782	20	65154	142957	11607.4	ID3,MDS2	E2F2	ID3	96	1
19_MACS_peak_3439_lociStitched	chr10	63696871	63820232	19	77520	149180	18417.8	ARID5B		ARID5B	97	1
7_MACS_peak_20906_lociStitched	chr3	154795857	154849128	7	35659	144082	13371	MME		MME	98	1
11_MACS_peak_11947_lociStitched	chr17	37909378	37958555	11	41832	138384	7691.28	IKZF3	C17orf37,GRB7	GRB7	99	1
18_MACS_peak_20408_lociStitched	chr3	71425368	71516410	18	60777	144893	14384.6	FOXP1		MIR1284	100	1
22_MACS_peak_8570_lociStitched	chr14	91771481	91886247	22	70146	144249	14024.4	CCDC88C		CCDC88C	101	1
11_MACS_peak_12814_lociStitched	chr17	78693364	78764783	11	51944	140017	9805.83	RPTOR		RPTOR	102	1
7_MACS_peak_1420_lociStitched	chr1	108318616	108387822	7	50920	141575	11806.5	VAV3		VAV3	103	1
11_MACS_peak_22508_lociStitched	chr4	175780879	175868738	11	37873	139634	11342.6	ADAM29	GLRA3	ADAM29	104	1
4_MACS_peak_7413_lociStitched	chr13	46942494	46980113	4	36183	137644	9367.13	C13orf18		C13orf18	105	1
18_MACS_peak_9443_lociStitched	chr15	67347267	67447266	18	74349	142499	14569.9	SMAD3	SMAD3	SMAD3	106	1
12_MACS_peak_5837_lociStitched	chr12	11879523	11990784	12	60915	143671	16166.2	ETV6		ETV6	107	1
9_MACS_peak_4885_lociStitched	chr11	65835809	65902580	9	48622	138249	11464.6	PACS1,SF3B2	CATSPER1,GAL3ST3	PACS1	108	1
10_MACS_peak_19439_lociStitched	chr22	47121837	47199614	10	41941	135472	9022.13	CERK,TBC1D22A		TBC1D22A	109	1
3_MACS_peak_26291_lociStitched	chr7	50342886	50370753	3	20432	135007	8683.36	IKZF1		IKZF1	110	1
14_MACS_peak_23099_lociStitched	chr5	79465379	79571498	14	51615	137435	11683.7	SERINC5	SPZ1,LOC644936	SERINC5	111	1
16_MACS_peak_22172_lociStitched	chr4	114468130	114567587	16	68393	141488	16788.3	CAMK2D		CAMK2D	112	1
4_MACS_peak_21386_lociStitched	chr4	26460	63166	4	22506	137890	13485.8	ZNF595,ZNF718		ZNF595	113	1
10_MACS_peak_6570_lociStitched	chr12	92824686	92900971	10	42105	135147	11679.2	CLLU1	CLLU1OS	CLLU1OS	114	1
18_MACS_peak_15588_lociStitched	chr2	47918770	48015451	18	56504	133526	10480.2	MSH6		MSH6	115	1
3_MACS_peak_20884_lociStitched	chr3	151900805	151925673	3	16968	133546	10581.3			MBNL1	116	1
9_MACS_peak_28003_lociStitched	chr8	81033919	81085230	9	39557	130766	9005.08	TPD52	TPD52	TPD52	117	1
2_MACS_peak_18763_lociStitched	chr22	22379353	22417167	2	31488	129282	8001.44		TOP3B	TOP3B	118	1
13_MACS_peak_10251_lociStitched	chr16	12172505	12268630	13	47598	131057	10564.1	SNX29		SNX29	119	1
11_MACS_peak_3216_lociStitched	chr10	26719424	26777358	11	44367	130398	10074.7	APBB1IP		APBB1IP	120	1
9_MACS_peak_18789_lociStitched	chr22	22705101	22787600	9	56111	132477	12432.6			LOC96610	121	1
16_MACS_peak_20309_lociStitched	chr3	58291656	58388296	16	50142	131778	12128.3	RPP14,PXK	PDHB	PXK	122	1
14_MACS_peak_17275_lociStitched	chr2	232468621	232552645	14	39739	127691	8234.35		C2orf57,PTMA,MIR1244-2	C2orf57	123	1
11_MACS_peak_23756_lociStitched	chr5	150571124	150638050	11	44335	128183	9122.01	CCDC69,GM2A	ANXA6,SLC36A3	CCDC69	124	1
4_MACS_peak_25053_lociStitched	chr6	88606301	88643747	4	29994	126148	7118.48			SPACA1	125	1
4_MACS_peak_1499_lociStitched	chr1	111735195	111775083	4	33197	124997	6406.01	DENND2D,CHI3L2	LOC149620	DENND2D	126	1
14_MACS_peak_3084_lociStitched	chr10	11557106	11655529	14	63332	134584	16525.2	USP6NL		USP6NL	127	1
10_MACS_peak_27112_lociStitched	chr7	130740136	130813534	10	41200	132483	14848.4	FLJ43663,MKLN1		FLJ43663	128	1
6_MACS_peak_21233_lociStitched	chr3	187798349	187855480	6	30727	132424	15042.6		LOC339929,LPP,FLJ42393	LPP	129	1
24_MACS_peak_27789_lociStitched	chr8	56735034	56858189	24	63382	133352	16096.4	TGS1,LYN	TMEM68	LYN	130	1
15_MACS_peak_11659_lociStitched	chr17	21170318	21277307	15	51818	135149	18573.3	MAP2K3	KCNJ12,C17orf103,KCNJ18	MAP2K3	131	1
7_MACS_peak_23389_lociStitched	chr5	124286907	124350728	7	37551	125957	9713.56			ZNF608	132	1
12_MACS_peak_2091_lociStitched	chr1	167569022	167658109	12	45376	127270	11180.4	RCSD1	CREG1,MPZL1	RCSD1	133	1
9_MACS_peak_4087_lociStitched	chr10	125793500	125867323	9	50707	125676	9752.02	CHST15		CHST15	134	1
10_MACS_peak_12547_lociStitched	chr17	66196048	66260099	10	44950	129236	13399.5	AMZ2,ARSG,LOC440461	AMZ2,SLC16A6	AMZ2	135	1
14_MACS_peak_4271_lociStitched	chr11	3858001	3949597	14	56954	127657	12640.2	STIM1,RHOG	PGAP2,NUP98	STIM1	136	1
9_MACS_peak_5236_lociStitched	chr11	102318650	102367212	9	35317	124965	10018.3	TMEM123	MMP7	TMEM123	137	1
10_MACS_peak_9887_lociStitched	chr15	93350819	93397613	10	37470	122563	7744.41		LOC100507217,ASB9P1,CHD2	ASB9P1	138	1
12_MACS_peak_15511_lociStitched	chr2	43352450	43425007	12	37223	120923	6617.2		LOC100129726,ZFP36L2	ZFP36L2	139	1
15_MACS_peak_29295_lociStitched	chr9	112809423	112920680	15	66077	129392	15442.5	AKAP2,PALM2-AKAP2	C9orf152	AKAP2	140	1
5_MACS_peak_28100_lociStitched	chr8	96137305	96188274	5	43854	124461	10550.6	PLEKHF2		PLEKHF2	141	1
14_MACS_peak_8331_lociStitched	chr14	70076448	70170966	14	63848	128837	15018.9	KIAA0247	C14orf162	KIAA0247	142	1
1_MACS_peak_21213_lociStitched	chr3	187448551	187470161	1	21611	121803	8561.88	BCL6,LOC100131635	RTP2	BCL6	143	1
7_MACS_peak_4658_lociStitched	chr11	58803328	58877560	7	44799	126655	13666.1	LOC283194,FAM111B	FAM111A,FAM111B	LOC283194	144	1
7_MACS_peak_29964_lociStitched	chrX	12964532	13033426	7	45472	118580	5683.76	TMSL3,TMSB4X	TLR8,FAM9C,LOC349408	TMSB4X	145	1
8_MACS_peak_18040_lociStitched	chr20	48275049	48331384	8	54498	122754	10168.5	B4GALT5		B4GALT5	146	1
12_MACS_peak_9905_lociStitched	chr15	94772257	94850795	12	48826	125017	12691.7	MCTP2	MCTP2	MCTP2	147	1
5_MACS_peak_8836_lociStitched	chr14	106780837	106830699	5	42437	139190	27469		NCRNA00226	NCRNA00226	148	1
10_MACS_peak_17914_lociStitched	chr20	43199983	43247676	10	38051	117105	7349.49	PKIG	ADA,SERINC3,PKIG	ADA	149	1
14_MACS_peak_2464_lociStitched	chr1	204415099	204500780	14	44638	118668	9236.41	MDM4,PIK3C2B	PPP1R15B,MDM4	PIK3C2B	150	1
6_MACS_peak_7310_lociStitched	chr13	41004095	41061017	6	33842	119986	10786.7	LOC646982	LOC646982	LOC646982	151	1
7_MACS_peak_6101_lociStitched	chr12	48190911	48232457	7	39318	115091	6078.18	HDAC7	RAPGEF3,SLC48A1,HDAC7	HDAC7	152	1
6_MACS_peak_5044_lociStitched	chr11	73680559	73711656	6	26731	116443	7656.08	DNAJB13,UCP2,UCP3		UCP2	153	1
4_MACS_peak_2330_lociStitched	chr1	192573180	192611452	4	26533	115612	7267.85	RGS13	RGS1	RGS13	154	1
8_MACS_peak_20765_lociStitched	chr3	133160161	133225921	8	33242	124648	17058.1	BFSP2		BFSP2	155	1
13_MACS_peak_5417_lociStitched	chr11	118722098	118809127	13	49890	116271	8781.23	CXCR5,BCL9L	UPK2,FOXR1	CXCR5	156	1
3_MACS_peak_26626_lociStitched	chr7	90334533	90369775	3	29297	117581	10435.2	CDK14		CDK14	157	1
14_MACS_peak_16221_lociStitched	chr2	102312739	102398625	14	64991	120661	13544.2	MAP4K4		MAP4K4	158	1
9_MACS_peak_2775_lociStitched	chr1	230386898	230447044	9	46743	113886	7031.07	GALNT2		PGBD5	159	1
3_MACS_peak_16262_lociStitched	chr2	109210411	109254632	3	31900	114329	7482.19	LIMS1	LIMS1	LIMS1	160	1
18_MACS_peak_63_lociStitched	chr1	1751668	1840814	18	58521	117245	10546	GNB1	NADK,TMEM52,CALML6	GNB1	161	1
3_MACS_peak_28104_lociStitched	chr8	96212072	96244266	3	31690	112702	6203.78		C8orf37	C8orf37	162	1
5_MACS_peak_28256_lociStitched	chr8	123784604	123822569	5	26902	114556	8568.7	ZHX2		ZHX2	163	1
14_MACS_peak_20513_lociStitched	chr3	105515994	105602485	14	53274	120266	14348.9	CBLB		CBLB	164	1
4_MACS_peak_29125_lociStitched	chr9	96022930	96065450	4	38416	111071	6063.35	WNK2	C9orf129	C9orf129	165	1
12_MACS_peak_9783_lociStitched	chr15	85983080	86048762	12	52271	114891	10916.3	AKAP13		AKAP13	166	1
3_MACS_peak_26979_lociStitched	chr7	121006535	121037438	3	29193	115432	11733.9	FAM3C	WNT16,FAM3C	FAM3C	167	1
11_MACS_peak_16922_lociStitched	chr2	197977522	198036764	11	39440	111760	9466.87	ANKRD44		ANKRD44	168	1
14_MACS_peak_16080_lociStitched	chr2	89973201	90092087	14	48188	130501	28271.1			ANKRD36BP2	169	1
3_MACS_peak_895_lociStitched	chr1	40828930	40871151	3	33422	109487	7498.45	SMAP2	ZNF643,COL9A2	SMAP2	170	1
6_MACS_peak_8297_lociStitched	chr14	68714591	68775012	6	36368	112190	10289.7	RAD51L1		RAD51L1	171	1
24_MACS_peak_19127_lociStitched	chr22	36724049	36832686	24	54450	111309	9690.42	MYH9	TXN2	MYH9	172	1
6_MACS_peak_9607_lociStitched	chr15	75054014	75093510	6	31742	106849	5268.77	CSK	ULK3,CYP1A1,CPLX3,LMAN1L,CYP1A2	CSK	173	1
7_MACS_peak_1189_lociStitched	chr1	66794442	66847442	7	32496	110229	8660.2	PDE4B		PDE4B	174	1
10_MACS_peak_5204_lociStitched	chr11	95917984	96001520	10	39895	118404	17024.6	MAML2		MIR1260B	175	1
8_MACS_peak_21649_lociStitched	chr4	37977876	38015834	8	34688	107937	6635.06	TBC1D1	PTTG2	PTTG2	176	1
20_MACS_peak_7006_lociStitched	chr12	123525044	123639368	20	60562	112975	11878.3	PITPNM2	MIR4304	PITPNM2	177	1
8_MACS_peak_8700_lociStitched	chr14	102273636	102320267	8	39799	109457	8995.12	PPP2R5C	PPP2R5C	PPP2R5C	178	1
7_MACS_peak_3996_lociStitched	chr10	112593100	112642483	7	33875	106949	7042.02	PDCD4,LOC282997,RBM20	SHOC2,NCRNA00081	LOC282997	179	1
11_MACS_peak_18541_lociStitched	chr21	44763223	44850830	11	40946	108396	9084.85	SIK1	C21orf125,C21orf84	SIK1	180	1
7_MACS_peak_18384_lociStitched	chr21	34730568	34786233	7	35429	105764	6707.63	IFNAR1,IFNGR2		IFNGR2	181	1
4_MACS_peak_22072_lociStitched	chr4	102709814	102746012	4	25813	105340	6609.75	BANK1	BANK1	BANK1	182	1
8_MACS_peak_11095_lociStitched	chr16	85922137	85990238	8	36933	106312	8308.32	IRF8		IRF8	183	1
11_MACS_peak_12483_lociStitched	chr17	62957682	63002712	11	33740	107712	10190.3	AMZ2P1	LRRC37A3	AMZ2P1	184	1
6_MACS_peak_6554_lociStitched	chr12	92525520	92580458	6	33327	106613	9317.48	BTG1		BTG1	185	1
8_MACS_peak_12452_lociStitched	chr17	61992323	62033394	8	34132	102020	5211.91	GH1,CD79B,SCN4A	CSH2,CSH1,GH1,GH2,CD79B,CSHL1,C17orf72	CD79B	186	1
MACS_peak_5821	chr12	10538524	10552971	1	14448	100788	4017.71	KLRK1	KLRC4,KLRC3,KLRC2	KLRK1	187	1
11_MACS_peak_6953_lociStitched	chr12	122393066	122471220	11	39558	105438	8698.54	BCL7A,WDR66	MLXIP	BCL7A	188	1
6_MACS_peak_7060_lociStitched	chr12	125390622	125426140	6	21453	102402	5810.74	UBC	SCARB1,DHX37	UBC	189	1
5_MACS_peak_18178_lociStitched	chr20	56040990	56074254	5	25004	100850	4936.38	CTCFL		CTCFL	190	1
13_MACS_peak_11265_lociStitched	chr17	1083374	1133955	13	41112	102249	6494.6	ABR	TUSC5,BHLHA9,ABR	ABR	191	1
12_MACS_peak_2488_lociStitched	chr1	205242169	205295027	12	36456	101704	6448.68	NUAK2,TMCC2	KLHDC8A	NUAK2	192	1
7_MACS_peak_5221_lociStitched	chr11	102138975	102196833	7	31045	106632	11409.6	BIRC3	BIRC2	BIRC3	193	1
5_MACS_peak_4852_lociStitched	chr11	65170809	65225246	5	31776	102510	7289.11	FRMD8,MIR612,NEAT1	MALAT1,TIGD3,SLC25A45	NEAT1	194	1
6_MACS_peak_5030_lociStitched	chr11	72849904	72901275	6	27250	104155	9267.33	FCHSD2	P2RY2	FCHSD2	195	1
6_MACS_peak_27435_lociStitched	chr8	8677423	8751805	6	50210	101219	6582.81	MFHAS1		MFHAS1	196	1
5_MACS_peak_7360_lociStitched	chr13	42061497	42087475	5	21235	99529.5	5218.98		C13orf15	C13orf15	197	1
2_MACS_peak_17974_lociStitched	chr20	45963902	45990552	2	19101	97877.5	4256.01	ZMYND8	LOC100131496,ZMYND8	ZMYND8	198	1
3_MACS_peak_15746_lociStitched	chr2	64863522	64900656	3	35406	101242	7627.32	SERTAD2	LOC339807	SERTAD2	199	1
8_MACS_peak_20282_lociStitched	chr3	55750117	55794735	8	26343	99565.1	6741.78	ERC2		C3orf51	200	1
18_MACS_peak_18589_lociStitched	chr21	45552566	45643744	18	49032	101481	8680.15	C21orf33	ICOSLG,PWP2,DNMT3L	C21orf33	201	1
8_MACS_peak_18801_lociStitched	chr22	22997443	23064341	8	42658	100207	7492.58		POM121L1P,GGTLC2	GGTLC2	202	1
2_MACS_peak_24100_lociStitched	chr6	1848691	1874351	2	25288	98498.5	5788.9	GMDS		FOXC1	203	1
6_MACS_peak_19233_lociStitched	chr22	39830959	39869878	6	38213	97760.6	5187.9	TAB1,MGAT3	MGAT3,TAB1,SMCR7L,ATF4	MGAT3	204	1
6_MACS_peak_5548_lociStitched	chr11	128555577	128610042	6	41108	101844	9525.93	FLI1		FLI1	205	1
4_MACS_peak_28695_lociStitched	chr9	20356444	20399912	4	22185	100181	7967.68	MLLT3		MLLT3	206	1
2_MACS_peak_1066_lociStitched	chr1	51420555	51451209	2	22953	97936.5	6336.18	CDKN2C,FAF1		CDKN2C	207	1
6_MACS_peak_28027_lociStitched	chr8	81976532	82025097	6	36449	99558.2	8124.92	PAG1		PAG1	208	1
5_MACS_peak_28374_lociStitched	chr8	134064355	134105738	5	28860	100019	8628.36	SLA,TG		SLA	209	1
3_MACS_peak_24870_lociStitched	chr6	44030991	44055866	3	21821	95054.8	3873.04		TMEM63B,MRPL14	MRPL14	210	1
14_MACS_peak_5573_lociStitched	chr11	129984196	130060331	14	43933	100628	9593.01	ST14,APLP2	APLP2	ST14	211	1
9_MACS_peak_24261_lociStitched	chr6	12034655	12084908	9	33116	99355.2	8321.9	HIVEP1		HIVEP1	212	1
4_MACS_peak_23683_lociStitched	chr5	142774544	142817285	4	26144	98184.6	7556.61	NR3C1	NR3C1	NR3C1	213	1
6_MACS_peak_25648_lociStitched	chr6	159513038	159556140	6	25533	96061.4	5736.88		FNDC1,TAGAP	FNDC1	214	1
7_MACS_peak_21365_lociStitched	chr3	197378889	197404033	7	22408	97289.7	7236.44	KIAA0226,MIR922	LOC220729	MIR922	215	1
2_MACS_peak_20565_lociStitched	chr3	111830241	111857284	2	26993	95967.5	5992.73	MIR567,C3orf52,GCET2		GCET2	216	1
7_MACS_peak_16767_lociStitched	chr2	175446091	175501854	7	33556	98271.1	8425.79	WIPF1		WIPF1	217	1
12_MACS_peak_111_lociStitched	chr1	4059294	4133780	12	36723	96764.8	7187.9			LOC100133612	218	1
11_MACS_peak_29847_lociStitched	chr9	140551292	140601106	11	32854	95632.9	6181.92	EHMT1	C9orf37	EHMT1	219	1
MACS_peak_28881	chr9	37135039	37149626	1	14588	93896.5	4491.34	ZCCHC7		ZCCHC7	220	1
5_MACS_peak_12363_lociStitched	chr17	56394595	56423680	5	20923	94296.5	4927	BZRAP1,SUPT4H1,MIR142	MPO	MIR142	221	1
9_MACS_peak_5473_lociStitched	chr11	121276375	121339201	9	39596	98127.9	8820.77	SORL1		SORL1	222	1
10_MACS_peak_23002_lociStitched	chr5	72417638	72498646	10	42850	98189.8	9056.69	TMEM174,TMEM171	TMEM171	TMEM174	223	1
5_MACS_peak_21181_lociStitched	chr3	186226370	186258925	5	28954	98394.2	9489.78	CRYGS	TBCCD1,DNAJB11,LOC253573	CRYGS	224	1
5_MACS_peak_7497_lociStitched	chr13	51158762	51211823	5	29309	98157.5	9588.12			DLEU7	225	1
10_MACS_peak_18124_lociStitched	chr20	52322247	52381586	10	26184	95939.3	7666.6			SUMO1P1	226	1
8_MACS_peak_23863_lociStitched	chr5	158429879	158493414	8	50501	99743.6	11817.5	EBF1		EBF1	227	1
9_MACS_peak_14490_lociStitched	chr19	40441425	40478031	9	29244	92946.3	5040.65	PSMC4	PSMC4,FCGBP,ZNF546	PSMC4	228	1
7_MACS_peak_3982_lociStitched	chr10	112393856	112443266	7	31062	94358.3	6966.81	RBM20		RBM20	229	1
13_MACS_peak_29031_lociStitched	chr9	84694464	84764956	13	38856	97511.6	10200.2			FAM75D1	230	1
7_MACS_peak_8182_lociStitched	chr14	61927664	61979578	7	31143	94929.9	7864.97	PRKCH		PRKCH	231	1
5_MACS_peak_21243_lociStitched	chr3	187923501	187967002	5	26331	98943	11958.4	LPP	FLJ42393	LPP	232	1
9_MACS_peak_23602_lociStitched	chr5	139012442	139092243	9	45619	95952.7	9711.78	CXXC5		CXXC5	233	1
1_MACS_peak_11797_lociStitched	chr17	29634185	29649362	1	15178	90392.7	4164.57	EVI2A,EVI2B,NF1	OMG,EVI2A	EVI2B	234	1
8_MACS_peak_2765_lociStitched	chr1	230239434	230306592	8	41395	94397.3	8435.04	GALNT2		GALNT2	235	1
9_MACS_peak_28095_lociStitched	chr8	96062520	96109553	9	35674	92956	7285.41	MIR3150,MIR3150B,C8orf38	PLEKHF2	MIR3150B	236	1
5_MACS_peak_5641_lociStitched	chr12	2348659	2371426	5	21407	90658.2	5052	CACNA1C		CACNA1C	237	1
10_MACS_peak_17097_lociStitched	chr2	217447610	217502392	10	35508	91973.5	6683.4	IGFBP2		IGFBP2	238	1
11_MACS_peak_10831_lociStitched	chr16	67551334	67601792	11	34251	90738.6	5560.47	FAM65A,CTCF	ATP6V0D1,CTCF,AGRP	FAM65A	239	1
6_MACS_peak_21875_lociStitched	chr4	78041564	78081592	6	27748	91163.8	6408.48	CCNG2	CCNI	CCNG2	240	1
MACS_peak_21809	chr4	71525449	71548063	1	22615	89472.3	5065.54	IGJ	ENAM,RUFY3,UTP3	IGJ	241	1
15_MACS_peak_27463_lociStitched	chr8	11271406	11367112	15	52986	89705.2	5503.1	FAM167A,C8orf12,BLK		FAM167A	242	1
2_MACS_peak_5283_lociStitched	chr11	111042868	111058219	2	13858	90214.8	6071.32			C11orf53	243	1
4_MACS_peak_9912_lociStitched	chr15	98684522	98718766	4	31825	89568.6	5427.67			ARRDC4	244	1
17_MACS_peak_24754_lociStitched	chr6	37068466	37141410	17	38724	90910.1	6812.97	PIM1		PIM1	245	1
14_MACS_peak_7232_lociStitched	chr13	30968339	31042217	14	40331	93285.8	9707.57	HMGB1	LOC100188949	HMGB1	246	1
3_MACS_peak_25958_lociStitched	chr7	20229537	20264446	3	21768	93172.1	9704.7	MACC1		MACC1	247	1
4_MACS_peak_8346_lociStitched	chr14	71106460	71136975	4	25413	88118.2	5236.37	TTC9	MED6	TTC9	248	1
6_MACS_peak_29766_lociStitched	chr9	139098731	139137766	6	24702	86946.6	4399.24	QSOX2	LHX3	QSOX2	249	1
6_MACS_peak_4812_lociStitched	chr11	64614515	64656437	6	38102	88476.4	6049.34	EHD1	GPHA2,ATG2A,MEN1,MAP4K2,CDC42BPG,PPP2R5B,MIR194-2,MIR192	EHD1	250	1
11_MACS_peak_4125_lociStitched	chr10	126367014	126434934	11	52532	91766.7	9413.71	FAM53B	METTL10	FAM53B	251	1
1_MACS_peak_7598_lociStitched	chr13	74696099	74711320	1	15222	89612.1	7324.35	KLF12		KLF12	252	1
6_MACS_peak_21669_lociStitched	chr4	39027298	39056993	6	28163	87683.4	5650.96	TMEM156,KLHL5	KLHL5	KLHL5	253	1
5_MACS_peak_17067_lociStitched	chr2	214009200	214055227	5	26360	89849.3	8017.9	IKZF2		IKZF2	254	1
7_MACS_peak_19647_lociStitched	chr3	11617058	11662789	7	34970	88475.8	6832.21	VGLL4	VGLL4	VGLL4	255	1
1_MACS_peak_26312_lociStitched	chr7	52565814	52580758	1	14945	86969.6	5333.51			POM121L12	256	1
7_MACS_peak_27669_lociStitched	chr8	37727988	37756029	7	26378	88048.7	6421.39	RAB11FIP1	BRF2,GOT1L1	RAB11FIP1	257	1
10_MACS_peak_3585_lociStitched	chr10	74055597	74097355	10	27492	86217.7	4681.07	DNAJB12	DDIT4,DNAJB12	DNAJB12	258	1
6_MACS_peak_17341_lociStitched	chr2	238570074	238613548	6	30645	88652.2	7125.39	LRRFIP1		LRRFIP1	259	1
6_MACS_peak_8908_lociStitched	chr15	31616230	31660715	6	42611	87679.9	6428.08	KLF13		KLF13	260	1
15_MACS_peak_3139_lociStitched	chr10	14584707	14668472	15	51886	92744.6	11668.5	FAM107B		MIR1265	261	1
2_MACS_peak_12162_lociStitched	chr17	44761808	44780869	2	17553	87528.1	6482.65	NSF		NSFP1	262	1
19_MACS_peak_11741_lociStitched	chr17	28008486	28106930	19	45624	93029.6	12029.9	SSH2		CORO6	263	1
2_MACS_peak_20721_lociStitched	chr3	128992078	129006560	2	14390	85708.8	4770.37	C3orf37,COPG	C3orf47,H1FX	C3orf37	264	1
2_MACS_peak_12151_lociStitched	chr17	44544116	44563166	2	17544	87412.8	6505.57		LRRC37A2	LRRC37A2	265	1
3_MACS_peak_23140_lociStitched	chr5	88110469	88144375	3	30679	89315.2	8605.34	MEF2C	MEF2C	MEF2C	266	1
5_MACS_peak_17130_lociStitched	chr2	219735211	219774909	5	26866	86597.2	6355.65	WNT10A,WNT6	PRKAG3,CDK5R2	WNT10A	267	1
3_MACS_peak_28238_lociStitched	chr8	119288405	119303890	3	13377	85396.7	5156.51	SAMD12		EXT1	268	1
4_MACS_peak_10682_lociStitched	chr16	47493666	47532141	4	20368	87461.4	7225.6	ITFG1,PHKB		PHKB	269	1
4_MACS_peak_26862_lociStitched	chr7	104643179	104678769	4	22540	88864.7	8691.08	MLL5,LOC100216545		MLL5	270	1
9_MACS_peak_21980_lociStitched	chr4	86618527	86674123	9	36527	88936.9	8917.6	ARHGAP24	ARHGAP24	ARHGAP24	271	1
7_MACS_peak_22963_lociStitched	chr5	66482093	66542810	7	35530	86716	7425.69	CD180		CD180	272	1
6_MACS_peak_561_lociStitched	chr1	26608041	26663730	6	27370	84825.5	5613.45	CD52,UBXN11,AIM1L	ZNF683,CCDC21,UBXN11,SH3BGRL3	UBXN11	273	1
5_MACS_peak_22444_lociStitched	chr4	164511097	164543731	5	22502	84717.9	5648.95	MARCH1		MARCH1	274	1
6_MACS_peak_21843_lociStitched	chr4	74439013	74487380	6	35002	87302.4	8241.74	RASSF6		RASSF6	275	1
9_MACS_peak_12697_lociStitched	chr17	74952857	75004506	9	27842	84709.5	5727.87			C17orf86	276	1
11_MACS_peak_16069_lociStitched	chr2	89473656	89547555	11	36753	97731.4	18777.7			ANKRD36BP2	277	1
11_MACS_peak_3373_lociStitched	chr10	49864217	49929074	11	27382	86642.5	7808.78	WDFY4		WDFY4	278	1
4_MACS_peak_24200_lociStitched	chr6	6378051	6412822	4	27749	84587.4	6262.26	LY86-AS1		F13A1	279	1
6_MACS_peak_16547_lociStitched	chr2	144960209	145008733	6	27149	86430.9	8186	GTDC1		GTDC1	280	1
9_MACS_peak_21035_lociStitched	chr3	177035005	177080470	9	28458	89902.5	11784.5			TBL1XR1	281	1
3_MACS_peak_4360_lociStitched	chr11	10323836	10345969	3	20808	82432.1	4357.99	ADM	SBF2	ADM	282	1
2_MACS_peak_26998_lociStitched	chr7	127049473	127073933	2	12873	84347.9	6337.59		ZNF800	ZNF800	283	1
5_MACS_peak_26459_lociStitched	chr7	69393869	69431692	5	31043	87473.3	9833.98	AUTS2		AUTS2	284	1
8_MACS_peak_23791_lociStitched	chr5	156597717	156646122	8	28258	85004	7430.17	ITK	MED7,CYFIP2,FAM71B	ITK	285	1
6_MACS_peak_25991_lociStitched	chr7	23449778	23517001	6	26803	89836.8	12584.1	IGF2BP3	RPS2P32	IGF2BP3	286	1
8_MACS_peak_9324_lociStitched	chr15	63758614	63810301	8	32990	86219.1	8978.03	USP3		USP3	287	1
4_MACS_peak_6454_lociStitched	chr12	70293587	70331223	4	24819	83055.1	5826.05			RAB3IP	288	1
4_MACS_peak_26671_lociStitched	chr7	93668377	93699175	4	22335	84679.1	7511.63		BET1	BET1	289	1
3_MACS_peak_23678_lociStitched	chr5	142592384	142613034	3	20607	80912.9	3977.19	ARHGAP26		NR3C1	290	1
7_MACS_peak_3676_lociStitched	chr10	82213055	82265607	7	33679	83657.5	6884.31	TSPAN14	C10orf58,SH2D4B	TSPAN14	291	1
12_MACS_peak_3527_lociStitched	chr10	72228444	72286615	12	35716	83411.4	6916.53	KIAA1274	NODAL	KIAA1274	292	1
7_MACS_peak_945_lociStitched	chr1	43388242	43430420	7	37142	82824.9	6491.19	FLJ32224,SLC2A1		FLJ32224	293	1
10_MACS_peak_26021_lociStitched	chr7	24907917	24976714	10	56113	93529.5	17233.6	OSBPL3	OSBPL3	OSBPL3	294	1
23_MACS_peak_6755_lociStitched	chr12	111015120	111118370	23	53540	81856.6	5771.68	PPTC7,HVCN1,TCTN1		TCTN1	295	1
11_MACS_peak_19842_lociStitched	chr3	30638263	30701487	11	43634	86863.5	11102.1	TGFBR2		TGFBR2	296	1
10_MACS_peak_12554_lociStitched	chr17	66452656	66511740	10	36367	83391.2	7781.36	WIPI1,PRKAR1A	FAM20A,MIR635	PRKAR1A	297	1
18_MACS_peak_24905_lociStitched	chr6	52147442	52265048	18	44174	88639.6	13277.7	MCM3,PAQR8	EFHC1,IL17F	PAQR8	298	1
14_MACS_peak_24115_lociStitched	chr6	2846470	2912509	14	39167	83433.7	8102.99	SERPINB9,MGC39372	SERPINB1	MGC39372	299	1
3_MACS_peak_27191_lociStitched	chr7	142490614	142509385	3	15954	80493.8	5169.53		TRY6,PRSS1,PRSS2,EPHB6	PRSS2	300	1
4_MACS_peak_7773_lociStitched	chr13	115073419	115107554	4	19480	82920.7	7984.18	ZNF828	UPF3A	ZNF828	301	1
7_MACS_peak_3097_lociStitched	chr10	11702910	11742583	7	30497	80496.5	5772.42		ECHDC3,USP6NL	ECHDC3	302	1
13_MACS_peak_17502_lociStitched	chr20	4922405	4983314	13	34602	82422.1	7698.9	SLC23A2		SLC23A2	303	1
23_MACS_peak_29884_lociStitched	chrX	1570470	1657067	23	45649	81453.1	6945.08	ASMTL,P2RY8		ASMTL	304	1
10_MACS_peak_26815_lociStitched	chr7	101922332	101978522	10	35138	83121.9	8956.69	CUX1,SH2B2,MIR4285	SPDYE6	MIR4285	305	1
2_MACS_peak_27070_lociStitched	chr7	129572511	129593503	2	8906	79551.3	5583.87	UBE2H		UBE2H	306	1
15_MACS_peak_17163_lociStitched	chr2	224650263	224703710	15	39919	80881.3	7044.31	AP1S3		AP1S3	307	1
3_MACS_peak_25478_lociStitched	chr6	149785327	149816928	3	22420	77858.5	4285.1	ZC3H12D		ZC3H12D	308	1
12_MACS_peak_3584_lociStitched	chr10	74003127	74037922	12	30051	78271.4	4732.12	DDIT4	ANAPC16,ASCC1	DDIT4	309	1
9_MACS_peak_142_lociStitched	chr1	8455425	8501956	9	27294	80205.5	6891.24	RERE		RERE	310	1
9_MACS_peak_18771_lociStitched	chr22	22509632	22574865	9	36059	82134.9	8858.64		VPREB1	VPREB1	311	1
5_MACS_peak_12980_lociStitched	chr18	9094677	9148577	5	29068	93284.7	20115.5	NDUFV2,ANKRD12		ANKRD12	312	1
2_MACS_peak_13237_lociStitched	chr18	48329701	48348660	2	18384	77523.4	4553.95	MRO		MRO	313	1
MACS_peak_7668	chr13	99948196	99964118	1	15923	79054.3	6227.09	GPR183,UBAC2	MIR623,FKSG29,GPR18	GPR183	314	1
9_MACS_peak_18071_lociStitched	chr20	49406834	49466178	9	30715	78197.6	5560.53	BCAS4	BCAS4	BCAS4	315	1
9_MACS_peak_16273_lociStitched	chr2	111874506	111933270	9	51367	81552.7	9543.27	BCL2L11,ACOXL		BCL2L11	316	1
13_MACS_peak_17871_lociStitched	chr20	39610796	39681177	13	38380	81156.3	9170.64	TOP1		TOP1	317	1
6_MACS_peak_25071_lociStitched	chr6	90053464	90086012	6	25412	77483.8	5500.61	RRAGD,UBE2J1	GABRR2	UBE2J1	318	1
5_MACS_peak_12324_lociStitched	chr17	55412551	55457528	5	29992	78781.7	6858.99	MSI2		MSI2	319	1
6_MACS_peak_9257_lociStitched	chr15	57550737	57599227	6	24460	79557.5	7661.42	TCF12,LOC283663		LOC283663	320	1
6_MACS_peak_7475_lociStitched	chr13	50679667	50706685	6	21948	78444.1	6727.48	DLEU2	DLEU1,ST13P4	DLEU2	321	1
4_MACS_peak_22451_lociStitched	chr4	164581611	164602488	4	13960	75105	3841.37	MARCH1	MARCH1	MARCH1	322	1
2_MACS_peak_26967_lociStitched	chr7	116310648	116348923	2	27014	83734.2	12776.2	MET	MET	MET	323	1
8_MACS_peak_2988_lociStitched	chr10	1495618	1545068	8	25684	77132.1	6191.14	ADARB2	NCRNA00168	NCRNA00168	324	1
2_MACS_peak_15150_lociStitched	chr2	8711301	8726761	2	15143	73724.1	2878.65			ID2	325	1
14_MACS_peak_19621_lociStitched	chr3	10207560	10269048	14	34132	77198.2	6413.2	IRAK2	TATDN2,VHL	IRAK2	326	1
20_MACS_peak_235_lociStitched	chr1	9840078	9924553	20	42672	80242.8	9494.99	CTNNBIP1,CLSTN1	CTNNBIP1	CLSTN1	327	1
5_MACS_peak_25630_lociStitched	chr6	159210147	159257393	5	30810	77757.5	7153.04	EZR	MIR3918,OSTCL	EZR	328	1
9_MACS_peak_29373_lociStitched	chr9	117349173	117383600	9	24311	74586.1	4348.13	C9orf91,ATP6V1G1		C9orf91	329	1
11_MACS_peak_19941_lociStitched	chr3	36917116	36975800	11	36893	77134.2	7165.32	TRANK1		TRANK1	330	1
11_MACS_peak_26821_lociStitched	chr7	102040407	102092313	11	32644	77879.8	8024.67	PRKRIP1,ORAI2	POLR2J,SPDYE6,ALKBH4,ORAI2,LRWD1	ORAI2	331	1
3_MACS_peak_5137_lociStitched	chr11	82763603	82785399	3	21153	75664.8	5983	RAB30	SNORA70E	RAB30	332	1
19_MACS_peak_30052_lociStitched	chrX	19810059	19915925	19	49728	76562.3	7093.02	SH3KBP1		SH3KBP1	333	1
11_MACS_peak_22654_lociStitched	chr5	366707	441100	11	36477	76959.6	7565.77	LOC100310782,AHRR	LOC25845,EXOC3,C5orf55	LOC100310782	334	1
3_MACS_peak_3470_lociStitched	chr10	65001138	65035379	3	21830	75652.1	6608.51	JMJD1C		JMJD1C	335	1
2_MACS_peak_29362_lociStitched	chr9	117125831	117161089	2	29556	73946.6	5010.16	AKNA	ORM2,ORM1	AKNA	336	1
9_MACS_peak_19256_lociStitched	chr22	40768291	40815802	9	32348	74882.1	6195.43	MKL1,SGSM3	ADSL	SGSM3	337	1
5_MACS_peak_22132_lociStitched	chr4	109056532	109091101	5	24689	74506.6	5890.56	LOC641518,LEF1	LEF1,LOC641518	LEF1	338	1
22_MACS_peak_17526_lociStitched	chr20	5622683	5700446	22	41473	75850	7278.62		GPCPD1,C20orf196	C20orf196	339	1
4_MACS_peak_11623_lociStitched	chr17	19013306	19046653	4	21362	77128.3	8560.17	GRAPL		GRAPL	340	1
7_MACS_peak_17304_lociStitched	chr2	233923957	233967222	7	30253	74407.1	5845.1	INPP5D	NEU2,INPP5D,NGEF	INPP5D	341	1
4_MACS_peak_6537_lociStitched	chr12	90248181	90288915	4	22665	75300.9	6814.8			LOC338758	342	1
MACS_peak_18169	chr20	55887679	55908037	1	20359	72132.5	3861.91	MIR4325,SPO11	RAE1,BMP7,MTRNR2L3	MIR4325	343	1
12_MACS_peak_9076_lociStitched	chr15	42746063	42804072	12	34195	75713.3	7523.77	SNAP23,ZFP106	CAPN3,LRRC57,HAUS2,SNAP23	SNAP23	344	1
6_MACS_peak_7616_lociStitched	chr13	77892765	77935075	6	21337	80367.8	12181	MYCBP2		MYCBP2	345	1
14_MACS_peak_17667_lociStitched	chr20	30249012	30312162	14	38593	73948.6	5847.69	BCL2L1	COX4I2,TPX2	BCL2L1	346	1
10_MACS_peak_9200_lociStitched	chr15	52509356	52555792	10	24509	74218.7	6278.15	MYO5C	GNB5,MIR1266	MIR1266	347	1
2_MACS_peak_9469_lociStitched	chr15	68050008	68081365	2	20246	73278.2	5942.15	MAP2K5	SKOR1	SKOR1	348	1
8_MACS_peak_9673_lociStitched	chr15	78308511	78370964	8	38392	75917.9	8631	TBC1D2B	SH2D7,LOC91450	TBC1D2B	349	1
4_MACS_peak_9216_lociStitched	chr15	52965091	53003052	4	20512	73579.8	6305.32	KIAA1370		KIAA1370	350	1
5_MACS_peak_19560_lociStitched	chr3	310147	341034	5	20231	71855.5	4806.02	CHL1		CHL1	351	1
6_MACS_peak_5248_lociStitched	chr11	103732588	103780942	6	19101	75388.7	8568.33	PDGFD		DDI1	352	1
6_MACS_peak_5536_lociStitched	chr11	128337654	128393684	6	46829	77377.4	10628.9	ETS1		ETS1	353	1
4_MACS_peak_29215_lociStitched	chr9	101866074	101900254	4	30519	72820.5	6073.79	TGFBR1	TGFBR1	TGFBR1	354	1
5_MACS_peak_16534_lociStitched	chr2	143878149	143921120	5	31358	75487.2	8826.24	ARHGAP15		ARHGAP15	355	1
5_MACS_peak_25327_lociStitched	chr6	126100741	126137331	5	25109	73578.8	6992.35	NCOA7	NCOA7,HEY2	NCOA7	356	1
5_MACS_peak_11181_lociStitched	chr16	89031452	89067045	5	28047	71278.5	4765.9	CBFA2T3	CBFA2T3	CBFA2T3	357	1
1_MACS_peak_23865_lociStitched	chr5	158514747	158534215	1	19469	70417.7	3961.74	EBF1		EBF1	358	1
10_MACS_peak_11054_lociStitched	chr16	84618716	84697775	10	33227	74758.2	8419.78	COTL1,KLHL36	USP10	COTL1	359	1
5_MACS_peak_27374_lociStitched	chr8	2463918	2513117	5	40233	71279.5	5082.26			MYOM2	360	1
1_MACS_peak_7474_lociStitched	chr13	50643421	50661381	1	17961	71536.5	5513.72	DLEU2,DLEU1	MIR15A,MIR16-1	DLEU1	361	1
4_MACS_peak_20970_lociStitched	chr3	167530956	167564755	4	21517	75723.3	9865.93	SERPINI1	LOC646168	LOC646168	362	1
MACS_peak_8646	chr14	96147379	96173239	1	25861	70349.5	4569.46	TCL1B	TCL6,TCL1A	TCL1B	363	1
4_MACS_peak_21316_lociStitched	chr3	195618956	195642364	4	18775	71420.1	5664.74	TNK2		TNK2	364	1
6_MACS_peak_25642_lociStitched	chr6	159459585	159495582	6	27529	71205.7	5493.14	TAGAP	RSPH3	TAGAP	365	1
4_MACS_peak_13154_lociStitched	chr18	38950606	38975835	4	23775	71731.1	6173.54			KC6	366	1
7_MACS_peak_21917_lociStitched	chr4	81487220	81541086	7	22119	72896.9	7541.24	C4orf22		C4orf22	367	1
4_MACS_peak_11952_lociStitched	chr17	38002280	38029757	4	17182	70747.8	5399.23	ZPBP2,IKZF3	ZPBP2,GSDMB	IKZF3	368	1
6_MACS_peak_12352_lociStitched	chr17	55674726	55716080	6	26596	70591.3	5297.45	MSI2		MRPS23	369	1
9_MACS_peak_19469_lociStitched	chr22	48465120	48502249	9	27925	70062.4	4863.9			MIR3201	370	1
4_MACS_peak_11622_lociStitched	chr17	18922253	18955206	4	20090	72793.2	7760.43	SLC5A10,GRAP	FAM83G	GRAP	371	1
1_MACS_peak_29972_lociStitched	chrX	13090598	13112427	1	21830	67383.9	2372.81		FAM9C	FAM9C	372	1
7_MACS_peak_27595_lociStitched	chr8	28219912	28277477	7	33264	68790.2	3885.64	ZNF395	PNOC	ZNF395	373	1
9_MACS_peak_23949_lociStitched	chr5	173100097	173173972	9	36992	73653.4	8761.58			BOD1	374	1
13_MACS_peak_2292_lociStitched	chr1	182991119	183075156	13	32755	76616.5	11773.6	LAMC1		LAMC1	375	1
5_MACS_peak_16502_lociStitched	chr2	136717745	136759055	5	18977	70921	6283.25	DARS		DARS	376	1
6_MACS_peak_10357_lociStitched	chr16	17528889	17565495	6	24368	69514.8	5077.25	XYLT1		XYLT1	377	1
6_MACS_peak_12249_lociStitched	chr17	47800624	47842710	6	24322	69387.2	5147.12	FAM117A	MYST2,SLC35B1,SPOP	FAM117A	378	1
3_MACS_peak_28401_lociStitched	chr8	135721307	135735400	3	13807	67478.7	3558.48	ZFAT	ZFAT	ZFAT	379	1
4_MACS_peak_26643_lociStitched	chr7	90947984	90978890	4	20814	69881.6	5977.22			FZD1	380	1
6_MACS_peak_15551_lociStitched	chr2	46761105	46803039	6	32698	70860.1	6986.2	RHOQ	CRIPT,ATP6V1E2,PIGF	RHOQ	381	1
11_MACS_peak_2269_lociStitched	chr1	182556988	182621702	11	36218	71444.3	7578.01	RGS16,RGS8,LOC284648	RNASEL,RGS8	LOC284648	382	1
1_MACS_peak_21346_lociStitched	chr3	196655873	196670740	1	14868	68908.5	5090.46	NCBP2,LOC152217,SENP5	PIGZ	NCBP2	383	1
1_MACS_peak_12587_lociStitched	chr17	71577691	71593873	1	16183	65941.6	2233.12	SDK2		SDK2	384	1
7_MACS_peak_13722_lociStitched	chr19	6571985	6609995	7	24451	67688.2	4036.66	CD70	TNFSF9	CD70	385	1
2_MACS_peak_1261_lociStitched	chr1	84211331	84236852	2	14044	68232.9	4637.17			TTLL7	386	1
10_MACS_peak_10529_lociStitched	chr16	29328932	29374990	10	26640	67530.2	3951.78	RUNDC2C		RUNDC2C	387	1
6_MACS_peak_2117_lociStitched	chr1	169639952	169681619	6	30834	70033.9	6529.22	SELL	SELE,SELP	SELL	388	1
MACS_peak_26236	chr7	45058678	45070350	1	11673	66609.8	3114.09	CCM2	C7orf40,SNORA9,MYO1G	CCM2	389	1
4_MACS_peak_7491_lociStitched	chr13	51083290	51118525	4	18862	70832.9	7438.11			DLEU7	390	1
3_MACS_peak_2585_lociStitched	chr1	211499387	211527874	3	16012	67215.1	3874.23	TRAF5	C1orf97	TRAF5	391	1
5_MACS_peak_26929_lociStitched	chr7	108137001	108168474	5	17141	69105.3	5803.62	PNPLA8	DNAJB9,NRCAM,THAP5	PNPLA8	392	1
11_MACS_peak_24386_lociStitched	chr6	24882661	24952950	11	30838	71919.7	9095.4	FAM65B	FAM65B	FAM65B	393	1
1_MACS_peak_18904_lociStitched	chr22	24819490	24834944	1	15455	65379.7	2760.08	C22orf45,ADORA2A		ADORA2A	394	1
7_MACS_peak_169_lociStitched	chr1	9120585	9146230	7	24436	66056.4	3464.64	SLC2A5	SLC2A7,GPR157	SLC2A5	395	1
10_MACS_peak_10386_lociStitched	chr16	21359495	21395870	10	24935	65398.6	2906.36		CRYM,LOC100190986,NCRNA00169,NPIPL3	NPIPL3	396	1
3_MACS_peak_9296_lociStitched	chr15	59684264	59707126	3	22753	66688.5	4250.05		FAM81A,MYO1E	MYO1E	397	1
10_MACS_peak_8391_lociStitched	chr14	74207642	74255391	10	34427	68944.8	6508.19	C14orf43	PNMA1	C14orf43	398	1
5_MACS_peak_8025_lociStitched	chr14	50425951	50447434	5	17456	65750.9	3396.46		C14orf182	C14orf182	399	1
MACS_peak_5863	chr12	12866615	12880708	1	14094	65449.3	3158.24	APOLD1,CDKN1B	MIR613,GPR19	CDKN1B	400	1
5_MACS_peak_13125_lociStitched	chr18	32606291	32632097	5	21079	68765.2	6536.66	MAPRE2	MAPRE2	MAPRE2	401	1
2_MACS_peak_3346_lociStitched	chr10	45850992	45874010	2	13700	65718.7	3547.07	ALOX5	OR13A1	ALOX5	402	1
7_MACS_peak_28916_lociStitched	chr9	37559847	37591448	7	24863	67256.4	5135.16	FBXO10,TOMM5	TOMM5	FBXO10	403	1
1_MACS_peak_5896_lociStitched	chr12	15100041	15117471	1	17431	65702.4	3642.87	ARHGDIB	PDE6H,ERP27	ARHGDIB	404	1
9_MACS_peak_22123_lociStitched	chr4	108949326	108996890	9	33108	68259.1	6311.74	HADH,LEF1		HADH	405	1
5_MACS_peak_13058_lociStitched	chr18	20801572	20823865	5	20961	66803.2	4888.85	CABLES1		CABLES1	406	1
9_MACS_peak_22404_lociStitched	chr4	154330572	154372249	9	25370	67145.8	5413.84	MND1	KIAA0922	KIAA0922	407	1
9_MACS_peak_24663_lociStitched	chr6	34604278	34662695	9	25807	68593.2	6881.52	C6orf106	C6orf106	C6orf106	408	1
3_MACS_peak_18173_lociStitched	chr20	55949131	55977161	3	19447	65444.4	3907.38	RAE1,RBM38	SPO11,MTRNR2L3	RBM38	409	1
10_MACS_peak_28568_lociStitched	chr9	526421	594317	10	31776	69973.6	8717.85	KANK1		KANK1	410	1
1_MACS_peak_7565_lociStitched	chr13	67565095	67573701	1	8607	65458.1	4231.57	PCDH9		PCDH9	411	1
1_MACS_peak_20915_lociStitched	chr3	155265696	155277328	1	11633	65911.6	4740.04	PLCH1		PLCH1	412	1
5_MACS_peak_25352_lociStitched	chr6	132803734	132835742	5	23963	67277.6	6177.54	STX7	TAAR9,TAAR8	STX7	413	1
4_MACS_peak_13263_lociStitched	chr18	52978295	53021893	4	42569	74452.3	13441.3	TCF4		TCF4	414	1
6_MACS_peak_29504_lociStitched	chr9	126066171	126112932	6	25449	66438	5630.02		CRB2,STRBP	CRB2	415	1
2_MACS_peak_13363_lociStitched	chr18	60974281	60990981	2	14636	64006.1	3224.77	BCL2	KDSR	BCL2	416	1
MACS_peak_4339	chr11	9701361	9716283	1	14923	64428.7	3708.12	SWAP70		SWAP70	417	1
5_MACS_peak_28044_lociStitched	chr8	86083947	86114627	5	22718	66416.1	5789.32	E2F5	E2F5,CA13,C8orf59	E2F5	418	1
9_MACS_peak_13418_lociStitched	chr18	74756065	74815630	9	35539	67951.8	7576.67	MBP	MBP	MBP	419	1
5_MACS_peak_5344_lociStitched	chr11	116787398	116806870	5	13942	63790.3	3454.33	SIK3		APOA1	420	1
5_MACS_peak_21026_lociStitched	chr3	176892037	176920548	5	17190	68249.6	7980.23	TBL1XR1		TBL1XR1	421	1
5_MACS_peak_23795_lociStitched	chr5	156679077	156712391	5	22178	64852.4	4703.94	CYFIP2,ITK		CYFIP2	422	1
7_MACS_peak_25440_lociStitched	chr6	143159876	143209359	7	33015	68573.5	8555.61	HIVEP2		HIVEP2	423	1
9_MACS_peak_3268_lociStitched	chr10	30702896	30745874	9	33192	67178.9	7190.22	MAP3K8	LOC729668	MAP3K8	424	1
4_MACS_peak_23056_lociStitched	chr5	78011587	78032807	4	21073	63759.7	3783.53			LHFPL2	425	1
1_MACS_peak_30115_lociStitched	chrX	33143149	33163749	1	20601	61872.1	2195.96	DMD		DMD	426	1
6_MACS_peak_18375_lociStitched	chr21	34561066	34614583	6	29097	66425.3	6785.96	IFNAR2	C21orf54,IL10RB	IFNAR2	427	1
3_MACS_peak_7408_lociStitched	chr13	46739420	46759217	3	19368	66080.4	6445.9	LCP1		LCP1	428	1
5_MACS_peak_3150_lociStitched	chr10	14686556	14717099	5	21244	63104.9	3558.26	FAM107B		FAM107B	429	1
MACS_peak_28872	chr9	37071018	37086185	1	15168	63496.6	4583.47	LOC100506710	ZCCHC7,PAX5	LOC100506710	430	1
3_MACS_peak_9734_lociStitched	chr15	81576351	81605600	3	19828	63166.1	4264.5	STARD5,IL16		IL16	431	1
4_MACS_peak_6541_lociStitched	chr12	90311114	90345775	4	23352	64455.6	5788.39			LOC338758	432	1
2_MACS_peak_16565_lociStitched	chr2	145252555	145283193	2	24285	65353.9	6786.32	ZEB2		ZEB2	433	1
11_MACS_peak_24172_lociStitched	chr6	5662448	5730341	11	35789	67404.2	9090.87	FARS2		NRN1	434	1
2_MACS_peak_5146_lociStitched	chr11	83384713	83400000	2	13600	62675.2	4482.15	DLG2		DLG2	435	1
11_MACS_peak_3801_lociStitched	chr10	97989552	98067150	11	32915	63622.6	5486.18	BLNK,DNTT	BLNK	BLNK	436	1
2_MACS_peak_8142_lociStitched	chr14	59813114	59831664	2	12519	62049.8	3988.25	DAAM1		GPR135	437	1
8_MACS_peak_23833_lociStitched	chr5	158171269	158211571	8	29865	65547.2	7500.2	EBF1		EBF1	438	1
2_MACS_peak_20928_lociStitched	chr3	156529809	156546674	2	13181	63201.6	5187.67	LEKR1,PA2G4P4		LEKR1	439	1
5_MACS_peak_25853_lociStitched	chr7	5717615	5744366	5	26180	62129.2	4429.97	RNF216		RNF216	440	1
3_MACS_peak_1720_lociStitched	chr1	150532377	150553172	3	18785	61459.6	3834.6	MCL1,ADAMTSL4	MIR4257,MCL1,ENSA	MCL1	441	1
5_MACS_peak_18509_lociStitched	chr21	43923429	43959315	5	22915	62531.4	5138.88	SLC37A1	RSPH1	SLC37A1	442	1
6_MACS_peak_26942_lociStitched	chr7	110709702	110745502	6	23958	66119	8831.86	IMMP2L,LRRN3	LRRN3	LRRN3	443	1
10_MACS_peak_18875_lociStitched	chr22	24131220	24192886	10	28824	63096.7	5926.1	DERL3,SMARCB1	SLC2A11,MIF,VPREB3,C22orf15,ZNF70,MMP11,SMARCB1,CHCHD10,DERL3	DERL3	444	1
9_MACS_peak_12184_lociStitched	chr17	45259271	45322926	9	27887	64756.2	7606.77	MYL4,CDC27	CDC27,ITGB3	MYL4	445	1
7_MACS_peak_1222_lociStitched	chr1	68176128	68226756	7	30090	64388.7	7366.37	GNG12	GADD45A	GADD45A	446	1
4_MACS_peak_26285_lociStitched	chr7	50180182	50208003	4	17389	63226	6223.56	C7orf72	ZPBP	C7orf72	447	1
4_MACS_peak_4933_lociStitched	chr11	67029736	67057952	4	19202	61431.9	4449.66	ANKRD13D,ADRBK1	SSH3,LOC100130987	ADRBK1	448	1
1_MACS_peak_19044_lociStitched	chr22	33958862	33976204	1	17343	59573.2	2797.26	LARGE		LARGE	449	1
4_MACS_peak_11580_lociStitched	chr17	17640336	17671122	4	19033	60509.9	3823.62	RAI1	MIR33B,SMCR5	SMCR5	450	1
12_MACS_peak_18944_lociStitched	chr22	26920053	26983565	12	30174	63423.1	6967.27	TPST2,MIR548J	TFIP11,CRYBA4,SRRD,CRYBB1,HPS4	MIR548J	451	1
6_MACS_peak_12964_lociStitched	chr18	8704022	8758139	6	28628	70969	14606.2	KIAA0802		KIAA0802	452	1
13_MACS_peak_29105_lociStitched	chr9	95478727	95533448	13	40405	62699.3	6364.05	BICD2	ANKRD19,IPPK,BICD2	BICD2	453	1
2_MACS_peak_21925_lociStitched	chr4	81949619	81975289	2	20325	60789.1	4481.98	BMP3		BMP3	454	1
6_MACS_peak_29332_lociStitched	chr9	115548437	115582682	6	18772	60401.3	4136.8	SNX30		SNX30	455	1
5_MACS_peak_27009_lociStitched	chr7	127743371	127776818	5	20014	63843.6	7589.12		MIR593	MIR593	456	1
15_MACS_peak_30150_lociStitched	chrX	38717102	38797387	15	39520	61345.8	5138.24			MID1IP1	457	1
6_MACS_peak_16943_lociStitched	chr2	198145759	198193936	6	23244	63945.3	7939.57	ANKRD44		ANKRD44	458	1
4_MACS_peak_8060_lociStitched	chr14	51278841	51303365	4	19051	60083.8	4161.72	NIN	ABHD12B	NIN	459	1
3_MACS_peak_8317_lociStitched	chr14	69255189	69284481	3	18377	59910.9	4048.15	C14orf181,ZFP36L1		C14orf181	460	1
7_MACS_peak_921_lociStitched	chr1	42087847	42140699	7	37591	63570.4	7711.11	HIVEP3		EDN2	461	1
4_MACS_peak_21591_lociStitched	chr4	25856013	25886701	4	26180	58607.9	2792.61	SEL1L3	C4orf52	SEL1L3	462	1
MACS_peak_28868	chr9	37027819	37041650	1	13832	59087.4	3373.38	PAX5	LOC100506710	PAX5	463	1
9_MACS_peak_15301_lociStitched	chr2	24526591	24584673	9	28746	63716	8143.1	ITSN2		ITSN2	464	1
3_MACS_peak_6842_lociStitched	chr12	117238323	117258337	3	19236	58312.8	2817.97	RNFT2		HRK	465	1
3_MACS_peak_16510_lociStitched	chr2	136863567	136896817	3	29531	61206.6	5881.93	CXCR4		CXCR4	466	1
1_MACS_peak_21096_lociStitched	chr3	181201012	181209581	1	8570	58400.3	3083.13			SOX2OT	467	1
8_MACS_peak_27855_lociStitched	chr8	61589917	61653995	8	41376	67730.4	12617	CHD7		CHD7	468	1
11_MACS_peak_25199_lociStitched	chr6	107934170	107997113	11	33956	63522.1	8522.48	SOBP		SOBP	469	1
MACS_peak_18166	chr20	55851680	55867212	1	15533	57561.6	2648.21		SPO11,BMP7,MIR4325	BMP7	470	1
7_MACS_peak_23470_lociStitched	chr5	131536320	131567989	7	27937	58834.7	3930.12	P4HA2	PDLIM4	P4HA2	471	1
MACS_peak_20731	chr3	129151570	129161447	1	9878	58404.7	3620.91	MBD4,IFT122	RPL32P3,C3orf25,SNORA7B	MBD4	472	1
2_MACS_peak_4668_lociStitched	chr11	59030813	59053938	2	16645	57498	2846.69			MPEG1	473	1
4_MACS_peak_22847_lociStitched	chr5	49709679	49742757	4	20342	62414.9	7955.26	EMB		EMB	474	1
7_MACS_peak_30625_lociStitched	chrX	119858896	119904717	7	22286	57610.7	3179.98			C1GALT1C1	475	1
6_MACS_peak_13023_lociStitched	chr18	13535467	13588509	6	23560	73383.6	18999.6	C18orf1	C18orf1	C18orf1	476	1
1_MACS_peak_7357_lociStitched	chr13	42030689	42043034	1	12346	57719	3491.17	C13orf15	OR7E37P	C13orf15	477	1
6_MACS_peak_25545_lociStitched	chr6	155634353	155675712	6	22282	59267.4	5128.52	TFB1M	CLDN20	TFB1M	478	1
5_MACS_peak_23639_lociStitched	chr5	140870606	140910872	5	20450	59038	4920.51	PCDHGB3,PCDHGC3,PCDHGA2,PCDHGA3,PCDHGA8,PCDHGA11,PCDHGA5,PCDHGA10,PCDHGA12,PCDHGA4,PCDHGA9,PCDHGB6,PCDHGC5,DIAPH1,PCDHGB4,PCDHGB5,PCDHGB7,PCDHGA7,PCDHGB1,PCDHGC4,PCDHGA1,PCDHGA6,PCDHGB2	PCDHGC3,PCDHGC4	PCDHGC5	479	1
3_MACS_peak_15518_lociStitched	chr2	43444364	43468378	3	18244	58008.2	3919.08	THADA,LOC100129726,ZFP36L2		LOC100129726	480	1
7_MACS_peak_8424_lociStitched	chr14	75885607	75939337	7	25222	60242.1	6211.19	JDP2	BATF	JDP2	481	1
12_MACS_peak_20074_lociStitched	chr3	46966845	47032612	12	39721	60821.3	6800.31	CCDC12,NBEAL2	PTH1R,NRADDP	CCDC12	482	1
2_MACS_peak_25150_lociStitched	chr6	106956858	106974692	2	17834	57611	3609.6	AIM1		AIM1	483	1
4_MACS_peak_26024_lociStitched	chr7	24990350	25023000	4	25482	62358.2	8443.29	OSBPL3	OSBPL3	OSBPL3	484	1
5_MACS_peak_26896_lociStitched	chr7	106502986	106536298	5	17764	60741.1	6862.27	PIK3CG		PIK3CG	485	1
6_MACS_peak_22487_lociStitched	chr4	174150881	174187192	6	26294	59865.9	6045.78	GALNT7		GALNT7	486	1
4_MACS_peak_21961_lociStitched	chr4	86394590	86421199	4	21183	58989.5	5199.4	ARHGAP24		ARHGAP24	487	1
6_MACS_peak_25818_lociStitched	chr7	3439472	3479584	6	18851	59778.9	6000.76	SDK1		SDK1	488	1
9_MACS_peak_14410_lociStitched	chr19	38395997	38424806	9	26274	57952.2	4174.42	SIPA1L3,WDR87		SIPA1L3	489	1
3_MACS_peak_22899_lociStitched	chr5	55962768	55993180	3	18019	57524.3	3892.74			MAP3K1	490	1
3_MACS_peak_5677_lociStitched	chr12	4915961	4941805	3	17206	57937.1	4323.7	KCNA6		KCNA6	491	1
4_MACS_peak_14802_lociStitched	chr19	49827549	49861083	4	21577	57141.9	3618.32	TEAD2,CD37,SLC6A16	DKKL1,CCDC155,CD37,MIR4324	CD37	492	1
9_MACS_peak_28418_lociStitched	chr8	142094319	142137181	9	27086	60611.2	7166.53		DENND3	DENND3	493	1
3_MACS_peak_16964_lociStitched	chr2	200278510	200299667	3	16817	57669.8	4233.52	SATB2	FLJ32063	SATB2	494	1
2_MACS_peak_19580_lociStitched	chr3	5219348	5241760	2	22343	57182	3877.28	EDEM1,ARL8B		EDEM1	495	1
MACS_peak_18165	chr20	55829306	55851631	1	22326	57185.5	3906.88	BMP7	MIR4325	BMP7	496	1
5_MACS_peak_8954_lociStitched	chr15	37303999	37339247	5	20486	58159.2	5001.69	MEIS2		MEIS2	497	1
3_MACS_peak_21023_lociStitched	chr3	176848531	176870440	3	17714	59960.6	6829.04	TBL1XR1		TBL1XR1	498	1
7_MACS_peak_26271_lociStitched	chr7	47740634	47778958	7	25393	59340.9	6384.78		C7orf65	C7orf65	499	1
MACS_peak_25735	chr7	1029885	1042687	1	12803	54735	1933.1	C7orf50	CYP2W1,ADAP1,MIR339,COX19	CYP2W1	500	1
4_MACS_peak_7456_lociStitched	chr13	50095609	50116193	4	18161	57598.1	4864	RCBTB1,PHF11		PHF11	501	1
2_MACS_peak_21256_lociStitched	chr3	188468254	188488106	2	9883	58358.9	5788.84	LPP		TPRG1	502	1
5_MACS_peak_2039_lociStitched	chr1	161674084	161711741	5	22593	57784.7	5588.3	FCRLB,FCRLA	FCGR2B,RPL31P11,ATF6,FCRLA,DUSP12	FCRLB	503	1
MACS_peak_25738	chr7	1056515	1071144	1	14630	54381.8	2220.68	C7orf50,MIR339	GPR146,CYP2W1,COX19	MIR339	504	1
2_MACS_peak_23177_lociStitched	chr5	96255951	96273878	2	12843	55742.2	3719.85	LNPEP	ERAP2,LNPEP	LNPEP	505	1
5_MACS_peak_11190_lociStitched	chr16	89150688	89190203	5	17814	56597.3	4607.45	ACSF3	CDH15,C16orf81	ACSF3	506	1
1_MACS_peak_16830_lociStitched	chr2	182168231	182179528	1	11298	55191.5	3303.24			ITGA4	507	1
1_MACS_peak_23443_lociStitched	chr5	128828337	128839223	1	10887	54393	2577.8	ADAMTS19		ADAMTS19	508	1
3_MACS_peak_28720_lociStitched	chr9	22510294	22530086	3	17916	55973.8	4164.24			DMRTA1	509	1
4_MACS_peak_27870_lociStitched	chr8	61820770	61842514	4	18919	56095.2	4300.96		LOC100130298	LOC100130298	510	1
7_MACS_peak_14267_lociStitched	chr19	28874905	28928413	7	32042	57226.8	5666.5			LOC148145	511	1
3_MACS_peak_23252_lociStitched	chr5	110558967	110592333	3	28074	57846.6	6339.54	CAMK4		CAMK4	512	1
MACS_peak_20956	chr3	160115735	160124930	1	9196	55294.1	3850.87	MIR15B,MIR16-2,SMC4,IFT80	IFT80,TRIM59	SMC4	513	1
8_MACS_peak_17932_lociStitched	chr20	43583592	43627585	8	24861	58453.5	7047.68	STK4,TOMM34	PABPC1L	STK4	514	1
5_MACS_peak_20425_lociStitched	chr3	72125623	72152092	5	22312	55222.3	3853.89			PROK2	515	1
5_MACS_peak_5812_lociStitched	chr12	10364530	10405835	5	19078	56877	5650.52	GABARAPL1	C12orf59,OLR1	GABARAPL1	516	1
4_MACS_peak_3269_lociStitched	chr10	30776570	30801040	4	23952	55676.6	4475.56			MAP3K8	517	1
8_MACS_peak_1425_lociStitched	chr1	108401255	108444499	8	26201	57683.2	6594.71	VAV3		VAV3	518	1
MACS_peak_6821	chr12	113644027	113662357	1	18331	54489.6	3429.54	TPCN1,IQCD	DDX54,C12orf52	IQCD	519	1
5_MACS_peak_13538_lociStitched	chr19	1646447	1672720	5	13948	53652.1	2643.06	TCF3	UQCR11	TCF3	520	1
15_MACS_peak_18756_lociStitched	chr22	22161979	22223093	15	28749	58632.8	7669.81	MAPK1		MAPK1	521	1
5_MACS_peak_15748_lociStitched	chr2	64947577	64980321	5	21012	56693	5753.12			SERTAD2	522	1
6_MACS_peak_23205_lociStitched	chr5	106694426	106732657	6	20405	56964.2	6036.67	EFNA5		EFNA5	523	1
9_MACS_peak_23735_lociStitched	chr5	150431338	150475486	9	26112	56942.1	6021.79	TNIP1	ANXA6,GPX3	TNIP1	524	1
6_MACS_peak_14344_lociStitched	chr19	35806400	35846488	6	26189	55578	4722.37	FFAR1,CD22	HAMP,USF2,MAG,FFAR3	CD22	525	1
3_MACS_peak_12577_lociStitched	chr17	68093733	68120407	3	15991	54884.4	4054.45	KCNJ16	KCNJ16,KCNJ2,FLJ36644	KCNJ16	526	1
6_MACS_peak_16314_lociStitched	chr2	112425773	112468813	6	24954	55250.4	4424.51			ANAPC1	527	1
5_MACS_peak_8747_lociStitched	chr14	104145056	104181925	5	22181	56944.2	6149.75	XRCC3,KLC1	ZFYVE21,XRCC3	XRCC3	528	1
9_MACS_peak_15141_lociStitched	chr2	8654485	8696478	9	32806	55787.7	5139.94			ID2	529	1
1_MACS_peak_20745_lociStitched	chr3	129606262	129613512	1	7251	54107.5	3465.5	TMCC1	TMCC1	TMCC1	530	1
8_MACS_peak_12498_lociStitched	chr17	63017983	63053865	8	31095	57038	6455.17	GNA13	AMZ2P1	GNA13	531	1
3_MACS_peak_30116_lociStitched	chrX	33181749	33204288	3	21465	53325	2864.71	DMD	DMD	DMD	532	1
6_MACS_peak_16028_lociStitched	chr2	88897606	88928380	6	24403	56276.4	5856.29	EIF2AK3		EIF2AK3	533	1
6_MACS_peak_29733_lociStitched	chr9	137094111	137144772	6	20355	54673.4	4275.79			RNU6ATAC	534	1
7_MACS_peak_21371_lociStitched	chr3	197435156	197480299	7	23956	60044.7	9692.2	KIAA0226,FYTTD1	LRCH3,MIR922	KIAA0226	535	1
4_MACS_peak_16932_lociStitched	chr2	198054922	198083625	4	23652	55996.7	5703.29	ANKRD44		ANKRD44	536	1
13_MACS_peak_19367_lociStitched	chr22	44412140	44477683	13	29331	56852	6560.85	PARVB		PARVB	537	1
5_MACS_peak_28385_lociStitched	chr8	134508538	134540138	5	16528	55606.5	5343.56	ST3GAL1		ST3GAL1	538	1
7_MACS_peak_15078_lociStitched	chr2	427671	465783	7	28926	54919.4	4863.09			FAM150B	539	1
3_MACS_peak_16990_lociStitched	chr2	201980374	201997777	3	16985	53448.1	3485.82	CFLAR	CASP10,FAM126B,NDUFB3	CFLAR	540	1
4_MACS_peak_7759_lociStitched	chr13	114808446	114835320	4	20910	57023.9	7081.3	RASA3		RASA3	541	1
2_MACS_peak_27905_lociStitched	chr8	66857618	66877698	2	11991	53183.9	3319.22			DNAJC5B	542	1
6_MACS_peak_16564_lociStitched	chr2	145182335	145230964	6	35707	58486.1	8621.92	ZEB2	ZEB2	ZEB2	543	1
4_MACS_peak_22591_lociStitched	chr4	186104950	186141853	4	19288	55568.5	5756.87	KIAA1430,SNX25	SLC25A4	KIAA1430	544	1
2_MACS_peak_28377_lociStitched	chr8	134138696	134160482	2	12344	54070.7	4625.17	TG	SLA,WISP1	SLA	545	1
5_MACS_peak_24823_lociStitched	chr6	42738292	42759356	5	18647	52428.3	3024.79		TBCC,LOC442211,PRPH2,KIAA0240	TBCC	546	1
2_MACS_peak_28327_lociStitched	chr8	128745843	128761831	2	15676	53724.5	4339.14	MYC	PVT1,MIR1204	MYC	547	1
3_MACS_peak_1297_lociStitched	chr1	87857933	87879359	3	20651	53267.2	3976.67			LMO4	548	1
1_MACS_peak_28220_lociStitched	chr8	116457247	116468130	1	10884	52887	3628.39	TRPS1		TRPS1	549	1
3_MACS_peak_7624_lociStitched	chr13	79962456	79981990	3	14800	55753.9	6506.78	RBM26		RBM26	550	1
5_MACS_peak_18032_lociStitched	chr20	48227047	48259497	5	20266	53873.5	4633.86	B4GALT5	PTGIS	PTGIS	551	1
5_MACS_peak_4510_lociStitched	chr11	44616124	44638693	5	22222	52066.7	3134.83	CD82	CD82	CD82	552	1
3_MACS_peak_20894_lociStitched	chr3	152090896	152121707	3	21574	58670.3	9807.14	MBNL1	TMEM14E	TMEM14E	553	1
4_MACS_peak_6075_lociStitched	chr12	46599341	46628345	4	23872	54118.6	5278.73	SLC38A1	SLC38A1	SLC38A1	554	1
5_MACS_peak_30222_lociStitched	chrX	42790941	42816200	5	18519	50778.2	1995.46			PPP1R2P9	555	1
8_MACS_peak_26751_lociStitched	chr7	99778118	99820321	8	20102	56028.7	7296.9	STAG3,GATS,PVRIG	C7orf59,GPC2,GAL3ST4,C7orf43	PVRIG	556	1
11_MACS_peak_24726_lociStitched	chr6	36689773	36750454	11	27264	53514.6	4957.64	CPNE5	CDKN1A	CDKN1A	557	1
5_MACS_peak_1493_lociStitched	chr1	111668964	111691659	5	20768	52697.8	4146.38	CEPT1,DRAM2		CEPT1	558	1
3_MACS_peak_6291_lociStitched	chr12	56314637	56334486	3	12738	51575.6	3048.81	DGKA,WIBG	SILV,RAB5B,CDK2	DGKA	559	1
7_MACS_peak_1880_lociStitched	chr1	155914126	155959596	7	20988	52645.2	4174.15	ARHGEF2	ARHGEF2,SCARNA4,SSR2,RIT1,RXFP4,SNORA42,KIAA0907	ARHGEF2	560	1
4_MACS_peak_21308_lociStitched	chr3	195349866	195362448	4	10614	52334.8	4022.47		APOD,SDHAP2	SDHAP2	561	1
3_MACS_peak_19070_lociStitched	chr22	36138913	36155945	3	14561	51831.8	3580.13	RBFOX2	APOL5	APOL5	562	1
1_MACS_peak_9242_lociStitched	chr15	56898032	56909887	1	11856	51110.5	2927			ZNF280D	563	1
7_MACS_peak_26856_lociStitched	chr7	104562811	104602037	7	18728	53625.9	5601.47	LOC723809		LOC723809	564	0
6_MACS_peak_12393_lociStitched	chr17	57694042	57724602	6	22139	53217.2	5201.31	CLTC		CLTC	565	0
5_MACS_peak_2182_lociStitched	chr1	174907031	174941274	5	17069	54090.2	6098.68	RABGAP1L	CACYBP	CACYBP	566	0
2_MACS_peak_5267_lociStitched	chr11	108091029	108108951	2	12180	52744.4	4765.46	ATM,NPAT		ATM	567	0
11_MACS_peak_9836_lociStitched	chr15	90701038	90760817	11	26498	53436.4	5493.69	SEMA4B	C15orf58,TTLL13,NGRN,CIB1	SEMA4B	568	0
7_MACS_peak_12819_lociStitched	chr17	78844242	78886221	7	26102	51940.6	4038.38	RPTOR		CHMP6	569	0
5_MACS_peak_28698_lociStitched	chr9	20974512	20999632	5	20521	51905.5	4059.39	KIAA1797	PTPLAD2	PTPLAD2	570	0
4_MACS_peak_13226_lociStitched	chr18	47812463	47843808	4	16848	54458.8	6613.8	CXXC1	MBD1,CXXC1,CCDC11	CXXC1	571	0
4_MACS_peak_13244_lociStitched	chr18	48664333	48686878	4	12232	51756.6	3958.9		MEX3C	MEX3C	572	0
7_MACS_peak_25984_lociStitched	chr7	23385268	23425932	7	20442	56169.2	8433.71	IGF2BP3	C7orf30	C7orf30	573	0
3_MACS_peak_16514_lociStitched	chr2	136982790	137014439	3	21642	52629.1	5038.52			CXCR4	574	0
7_MACS_peak_19702_lociStitched	chr3	14441918	14496221	7	27137	53396.1	5821.28	SLC6A6		SLC6A6	575	0
MACS_peak_8643	chr14	96124871	96135812	1	10942	49444.6	2002.2	TCL6	TCL1A,TCL1B	TCL6	576	0
5_MACS_peak_14575_lociStitched	chr19	42612548	42638564	5	19277	50811.8	3389.88	MIR4323,POU2F2	GRIK5,ZNF574	POU2F2	577	0
6_MACS_peak_27690_lociStitched	chr8	38790380	38824484	6	26807	54082.1	6848.08	PLEKHA2	ADAM9,TM2D2,HTRA4	HTRA4	578	0
2_MACS_peak_17486_lociStitched	chr20	4789354	4805395	2	13428	50059.1	2845.67	RASSF2		RASSF2	579	0
5_MACS_peak_29039_lociStitched	chr9	84782337	84807372	5	18059	51441.9	4316.03			FAM75D1	580	0
7_MACS_peak_26451_lociStitched	chr7	69335501	69371838	7	27647	54956.1	7834.26	AUTS2		AUTS2	581	0
4_MACS_peak_7828_lociStitched	chr14	23018324	23040109	4	20846	50959.5	3936.55	DAD1	ABHD4	DAD1	582	0
5_MACS_peak_3157_lociStitched	chr10	14764350	14803888	5	19275	50924.9	3934.03	FAM107B		FAM107B	583	0
6_MACS_peak_6840_lociStitched	chr12	117143972	117183067	6	23663	51840	4984.61	RNFT2,C12orf49	RNFT2	C12orf49	584	0
6_MACS_peak_29232_lociStitched	chr9	102841446	102862919	6	21123	51359.1	4505.04	INVS,ERP44	INVS	ERP44	585	0
2_MACS_peak_22722_lociStitched	chr5	14663488	14686674	2	18706	51201.6	4354.33	FAM105B		FAM105B	586	0
4_MACS_peak_1314_lociStitched	chr1	90307666	90331866	4	19442	51219.3	4375.36	LRRC8D		LRRC8D	587	0
6_MACS_peak_8989_lociStitched	chr15	40452254	40491434	6	19607	51964.4	5120.83	BUB1B	PAK6	BUB1B	588	0
5_MACS_peak_7815_lociStitched	chr14	22886871	22920342	5	19260	52117.7	5281.72			DAD1	589	0
11_MACS_peak_20018_lociStitched	chr3	42155200	42218468	11	27880	55486	8680.37	TRAK1		TRAK1	590	0
5_MACS_peak_19080_lociStitched	chr22	36407153	36426101	5	15278	49723.3	2940.73	RBFOX2		RBFOX2	591	0
5_MACS_peak_13110_lociStitched	chr18	31405890	31436103	5	25958	53875.8	7118.18	NOL4		NOL4	592	0
4_MACS_peak_333_lociStitched	chr1	16156279	16179556	4	17199	51023.2	4390.04	SPEN,FLJ37453	UQCRHL	SPEN	593	0
4_MACS_peak_23819_lociStitched	chr5	157824773	157865831	4	14784	52127.2	5571.57			CLINT1	594	0
6_MACS_peak_21798_lociStitched	chr4	68409024	68448044	6	17541	52774.6	6223.69	CENPC1,STAP1		STAP1	595	0
4_MACS_peak_11125_lociStitched	chr16	87731304	87759672	4	19368	50109.2	3682.17	JPH3,LOC100129637,KLHDC4	KLHDC4	LOC100129637	596	0
9_MACS_peak_10111_lociStitched	chr16	3656685	3711947	9	21758	52239.2	6034.61	SLX4,DNASE1,TRAP1	NLRC3	DNASE1	597	0
9_MACS_peak_1977_lociStitched	chr1	160397973	160462137	9	21944	53840	7635.52	VANGL2,SLAMF6	SLAMF6	VANGL2	598	0
3_MACS_peak_8933_lociStitched	chr15	32904359	32930241	3	15844	52294.6	6398.03	ARHGAP11A	SCG5	ARHGAP11A	599	0
7_MACS_peak_20937_lociStitched	chr3	156781455	156823798	7	24520	56155.3	10268.2	LOC100498859,LOC339894		LOC100498859	600	0
4_MACS_peak_19706_lociStitched	chr3	14713602	14733948	4	15836	49050.1	3208.56	C3orf19,C3orf20	C3orf20	C3orf20	601	0
8_MACS_peak_25448_lociStitched	chr6	143223135	143269853	8	24696	53651	7900.01	HIVEP2		HIVEP2	602	0
2_MACS_peak_25631_lociStitched	chr6	159274044	159292444	2	12800	48576	2837.28	OSTCL	EZR,C6orf99	OSTCL	603	0
4_MACS_peak_16978_lociStitched	chr2	201557192	201581643	4	18886	50371.5	4640.8	AOX2P		AOX2P	604	0
12_MACS_peak_21910_lociStitched	chr4	81383783	81462989	12	30233	56814.5	11112.6	C4orf22		C4orf22	605	0
1_MACS_peak_27978_lociStitched	chr8	79764069	79774268	1	10200	48542.1	2889.38		IL7	IL7	606	0
3_MACS_peak_1545_lociStitched	chr1	114470033	114491257	3	17009	48972.3	3357.64	HIPK1	HIPK1,BCL2L15,DCLRE1B,OLFML3,AP4B1	HIPK1	607	0
2_MACS_peak_19508_lociStitched	chr22	50622891	50641788	2	16543	48198.7	2615.34	TRABD,SELO	PANX2,TUBGCP6,HDAC10,MOV10L1	SELO	608	0
14_MACS_peak_12630_lociStitched	chr17	73315791	73375653	14	31927	52858.1	7351.05	GRB2	LOC100287042,MIR3678,MIF4GD,SLC25A19	GRB2	609	0
9_MACS_peak_23665_lociStitched	chr5	142350698	142411131	9	25144	52026.8	6556.98	ARHGAP26		ARHGAP26	610	0
7_MACS_peak_24316_lociStitched	chr6	15878777	15917197	7	22071	49730.8	4337.62			MYLIP	611	0
5_MACS_peak_15249_lociStitched	chr2	16789806	16818007	5	16632	49543.5	4185.03	FAM49A		FAM49A	612	0
4_MACS_peak_1073_lociStitched	chr1	51956118	51985303	4	16171	49985.1	4663.76	EPS15		EPS15	613	0
7_MACS_peak_10345_lociStitched	chr16	17434546	17475348	7	26994	50484.3	5210.42	XYLT1		XYLT1	614	0
6_MACS_peak_7190_lociStitched	chr13	27997518	28030384	6	16126	49831.4	4657.11	MTIF3,GTF3A		MTIF3	615	0
MACS_peak_28864	chr9	36992514	37008010	1	15497	48087.2	2965.93	PAX5		PAX5	616	0
6_MACS_peak_23381_lociStitched	chr5	124223362	124272140	6	19283	51690	6589.91			ZNF608	617	0
2_MACS_peak_6242_lociStitched	chr12	54140358	54152886	2	11584	47250.6	2290.12		CALCOCO1	CALCOCO1	618	0
5_MACS_peak_4326_lociStitched	chr11	9615310	9642363	5	15617	48314	3443.85		WEE1,SWAP70	WEE1	619	0
4_MACS_peak_8053_lociStitched	chr14	51113183	51145235	4	15420	49421	4673.18	SAV1		SAV1	620	0
4_MACS_peak_13933_lociStitched	chr19	12887968	12908090	4	18239	47799.8	3082.69	JUNB,PRDX2	ASNA1,HOOK2,RNASEH2A,RTBDN,C19orf43,MAST1,BEST2	JUNB	621	0
4_MACS_peak_15685_lociStitched	chr2	61089503	61118581	4	12379	48915	4204.68	REL,FLJ16341		FLJ16341	622	0
6_MACS_peak_18417_lociStitched	chr21	36216065	36263359	6	26018	50954.6	6261.73	RUNX1		RUNX1	623	0
5_MACS_peak_19676_lociStitched	chr3	13365293	13392175	5	21160	47411.8	2787.66	NUP210		NUP210	624	0
1_MACS_peak_7756_lociStitched	chr13	114785700	114794234	1	8535	47443.9	2850.36	RASA3		RASA3	625	0
4_MACS_peak_4643_lociStitched	chr11	58333609	58364778	4	16037	51204.4	6667.05	ZFP91,LPXN,ZFP91-CNTF	CNTF	ZFP91	626	0
9_MACS_peak_5680_lociStitched	chr12	6304685	6343675	9	34812	49603.1	5185.67	CD9		CD9	627	0
14_MACS_peak_14016_lociStitched	chr19	15392780	15445553	14	34960	51796.7	7451.55		EPHX3,BRD4,AKAP8	BRD4	628	0
6_MACS_peak_9708_lociStitched	chr15	79262937	79318040	6	19918	49477	5141.11	RASGRF1	CTSH	RASGRF1	629	0
1_MACS_peak_3437_lociStitched	chr10	63656415	63665590	1	9176	46552.1	2402.01	ARID5B		ARID5B	630	0
5_MACS_peak_26447_lociStitched	chr7	69266569	69311528	5	23162	53757.5	9675.18	AUTS2		AUTS2	631	0
6_MACS_peak_10798_lociStitched	chr16	66549129	66584821	6	21006	47420.4	3397.88	TK2	CKLF,CMTM1,CMTM2,TK2	TK2	632	0
5_MACS_peak_15154_lociStitched	chr2	8792561	8826655	5	15363	49299.9	5281.16	ID2		ID2	633	0
4_MACS_peak_20341_lociStitched	chr3	62780840	62813658	4	23926	49755.4	5749.71	CADPS	CADPS	CADPS	634	0
1_MACS_peak_5332_lociStitched	chr11	115086445	115097585	1	11141	46488.3	2500.93	CADM1		CADM1	635	0
4_MACS_peak_26530_lociStitched	chr7	74505511	74523206	4	9667	48146.3	4179.56	GTF2IRD2B	WBSCR16	GTF2IRD2B	636	0
1_MACS_peak_26614_lociStitched	chr7	86840509	86850585	1	10077	46655.9	2689.28	C7orf23		C7orf23	637	0
4_MACS_peak_26521_lociStitched	chr7	74253050	74270715	4	9636	47905.7	4103.58	GTF2IRD2	PMS2P5,STAG3L2	GTF2IRD2	638	0
2_MACS_peak_8199_lociStitched	chr14	62213083	62233727	2	13771	47266.5	3565.22	SNAPC1,HIF1A		SNAPC1	639	0
7_MACS_peak_17223_lociStitched	chr2	231067196	231099055	7	21232	48629.6	4963.63	SP110,SP140	SP110	SP110	640	0
MACS_peak_7671	chr13	100002221	100020207	1	17987	49166.5	5530.69	FKSG29,UBAC2,MIR623	GPR183	MIR623	641	0
4_MACS_peak_9431_lociStitched	chr15	66983812	67014281	4	19122	47342.7	3756.83	SMAD6	SMAD6	SMAD6	642	0
4_MACS_peak_5537_lociStitched	chr11	128413526	128435757	4	15761	47412.1	3857.08	ETS1	ETS1	ETS1	643	0
3_MACS_peak_4556_lociStitched	chr11	47122854	47148138	3	13271	45847.5	2404.51	C11orf49		ARFGAP2	644	0
MACS_peak_24607	chr6	32904601	32916599	1	11999	45837.2	2536.38	HLA-DMA,HLA-DMB	LOC100294145,BRD2	HLA-DMB	645	0
3_MACS_peak_25063_lociStitched	chr6	88870629	88891063	3	14022	47588.7	4323.83	CNR1	CNR1	CNR1	646	0
2_MACS_peak_5149_lociStitched	chr11	84252443	84280460	2	18979	49206.3	6001.24	DLG2		DLG2	647	0
3_MACS_peak_21657_lociStitched	chr4	38759598	38785229	3	11686	46171.7	3019.33	TLR10	TLR1,TLR10	TLR10	648	0
11_MACS_peak_2216_lociStitched	chr1	178607066	178654617	11	25865	49091.7	5991.43		RALGPS2	RALGPS2	649	0
3_MACS_peak_523_lociStitched	chr1	25341535	25361878	3	18051	45924.3	2845.99			RUNX3	650	0
7_MACS_peak_13599_lociStitched	chr19	2610616	2637745	7	23532	46241.4	3203.93	GNG7		GNG7	651	0
MACS_peak_744	chr1	32711878	32723759	1	11882	45233.3	2205.11	LCK,FAM167B	EIF3I,IQCC,C1orf91,DCDC2B,CCDC28B,LCK,HDAC1,MTMR9LP	LCK	652	0
3_MACS_peak_14332_lociStitched	chr19	35691349	35716505	3	17872	45899.6	2872.82	FAM187B	FXYD5,LSR,USF2	FAM187B	653	0
MACS_peak_4945	chr11	67199823	67214675	1	14853	46020.4	3014.96	CORO1B,RPS6KB2,PTPRCAP	PPP1CA,AIP,CABP4,TBC1D10C,GPR152,TMEM134,CARNS1,RAD9A	PTPRCAP	654	0
16_MACS_peak_3809_lociStitched	chr10	98426972	98481436	16	34469	46681.1	3698.11	PIK3AP1		PIK3AP1	655	0
4_MACS_peak_2188_lociStitched	chr1	175155295	175196285	4	20477	49134.7	6185.39	KIAA0040	KIAA0040	KIAA0040	656	0
3_MACS_peak_26263_lociStitched	chr7	47704297	47721419	3	13660	45291.1	2573.44		C7orf65	C7orf65	657	0
5_MACS_peak_1939_lociStitched	chr1	157739627	157779900	5	22637	49229.7	6512.14	FCRL2,FCRL1	FCRL1,CD5L	FCRL2	658	0
7_MACS_peak_18963_lociStitched	chr22	27037897	27071448	7	22083	46974.8	4260.98	MIAT	CRYBA4,CRYBB1	MIAT	659	0
5_MACS_peak_1576_lociStitched	chr1	118195422	118228113	5	20688	47709.2	5096.53		FAM46C	FAM46C	660	0
13_MACS_peak_8916_lociStitched	chr15	31726250	31782689	13	25535	49429.3	6947.64	OTUD7A		KLF13	661	0
2_MACS_peak_16353_lociStitched	chr2	114642221	114661179	2	18892	46809.2	4337.59	ACTR3		ACTR3	662	0
7_MACS_peak_19314_lociStitched	chr22	42227261	42261920	7	24678	47299.1	4841.86	SREBF2	CCDC134,MIR33A	SREBF2	663	0
6_MACS_peak_15679_lociStitched	chr2	61021327	61072264	6	19107	48517.5	6066.6	PAPOLG	FLJ16341,REL	FLJ16341	664	0
1_MACS_peak_24208_lociStitched	chr6	6584483	6594510	1	10028	44568	2124.72	LY86-AS1,LY86		LY86	665	0
3_MACS_peak_4390_lociStitched	chr11	14783680	14811880	3	16238	47533.9	5115.48	PDE3B		CYP2R1	666	0
4_MACS_peak_23546_lociStitched	chr5	134366405	134392383	4	13527	45635.6	3307	PITX1		PITX1	667	0
10_MACS_peak_14067_lociStitched	chr19	17177883	17222454	10	28338	46336	4011.39	HAUS8,MYO9B	CPAMD8,HAUS8	MYO9B	668	0
1_MACS_peak_7564_lociStitched	chr13	67456284	67464925	1	8642	45420.6	3206.68	PCDH9		PCDH9	669	0
7_MACS_peak_7080_lociStitched	chr12	129267568	129326783	7	24576	48816.8	6643.92	SLC15A4	GLT1D1	SLC15A4	670	0
4_MACS_peak_26246_lociStitched	chr7	47511674	47542511	4	20791	48145.8	6099.56	TNS3		TNS3	671	0
1_MACS_peak_15201_lociStitched	chr2	11967016	11977795	1	10780	44370.7	2328.26	LPIN1,MIR4262		MIR4262	672	0
3_MACS_peak_16035_lociStitched	chr2	89036094	89057635	3	15308	45600.1	3571.5	RPIA	ANKRD36BP2	ANKRD36BP2	673	0
4_MACS_peak_8220_lociStitched	chr14	64318802	64341709	4	20137	45795.7	3793.4	SYNE2	SYNE2	SYNE2	674	0
5_MACS_peak_4858_lociStitched	chr11	65238587	65275473	5	17219	46398.9	4418.94	MALAT1	NEAT1,MIR612,SCYL1	MALAT1	675	0
5_MACS_peak_905_lociStitched	chr1	41156516	41179762	5	19391	45359.9	3542.69	NFYC,LOC100130557	NFYC,MIR30E,MIR30C1,RIMS3	LOC100130557	676	0
6_MACS_peak_15760_lociStitched	chr2	65131268	65175443	6	21139	46304.2	4572.11	LOC400958	SLC1A4	LOC400958	677	0
1_MACS_peak_22400_lociStitched	chr4	154261606	154272828	1	11223	44032.9	2340.91	MND1	ANXA2P1	MND1	678	0
6_MACS_peak_27174_lociStitched	chr7	139908757	139933453	6	14520	45519.7	3827.88		LOC100134229,JHDM1D	LOC100134229	679	0
2_MACS_peak_1610_lociStitched	chr1	121257233	121272375	2	8917	45530.5	3852.12	EMBP1		EMBP1	680	0
2_MACS_peak_8889_lociStitched	chr15	30915518	30933320	2	11532	47032.9	5358.4	ARHGAP11B		ARHGAP11B	681	0
6_MACS_peak_5325_lociStitched	chr11	114009733	114051939	6	22838	46557.4	4976.09	ZBTB16		ZBTB16	682	0
3_MACS_peak_311_lociStitched	chr1	14985619	15006305	3	15760	44580.4	3024.29	KAZ		KAZ	683	0
6_MACS_peak_1511_lociStitched	chr1	112134256	112173759	6	22720	47146.8	5613.38	LOC100129269,RAP1A	RAP1A,ADORA3	LOC100129269	684	0
2_MACS_peak_22394_lociStitched	chr4	153580666	153603405	2	14211	45493.9	4002.06	TMEM154		TMEM154	685	0
MACS_peak_10324	chr16	15727373	15738359	1	10987	44048.4	2609.18	KIAA0430,NDE1,MIR484	NDE1,KIAA0430	KIAA0430	686	0
14_MACS_peak_191_lociStitched	chr1	9570010	9630887	14	30009	47283.2	5856.37	SLC25A33	TMEM201	SLC25A33	687	0
9_MACS_peak_21823_lociStitched	chr4	71767046	71811815	9	22498	46756.7	5345.42	MOBKL1A	DCK	MOBKL1A	688	0
7_MACS_peak_13715_lociStitched	chr19	6515923	6552637	7	17939	44736	3344.65	TNFSF9	DENND1C,TUBB4,CD70	TNFSF9	689	0
5_MACS_peak_26515_lociStitched	chr7	74057268	74085515	5	13702	45104.8	3776.62	GTF2I	GTF2I	GTF2I	690	0
7_MACS_peak_24931_lociStitched	chr6	53173629	53225541	7	25629	48921.9	7594.73	ELOVL5		ELOVL5	691	0
13_MACS_peak_8467_lociStitched	chr14	78008235	78084165	13	27481	50334	9020.48	SPTLC2	ISM2	SPTLC2	692	0
3_MACS_peak_24698_lociStitched	chr6	35680814	35700853	3	13108	44085.8	2787.42	FKBP5,LOC285847	FKBP5,C6orf126,C6orf81,C6orf127	FKBP5	693	0
4_MACS_peak_21831_lociStitched	chr4	71844554	71876497	4	16409	45608.2	4376.19	MOBKL1A,DCK		DCK	694	0
1_MACS_peak_27217_lociStitched	chr7	146349191	146357769	1	8579	43819	2596.56	CNTNAP2		CNTNAP2	695	0
3_MACS_peak_25890_lociStitched	chr7	7286650	7316817	3	19982	46122.3	4941.35	C1GALT1		C1GALT1	696	0
5_MACS_peak_19350_lociStitched	chr22	43505867	43545329	5	22465	44994.6	3867.28	BIK,MCAT	TSPO,TTLL12,TTLL1,MCAT	MCAT	697	0
3_MACS_peak_30180_lociStitched	chrX	40007579	40037409	3	17232	42967.1	1918.07	BCOR		BCOR	698	0
7_MACS_peak_30135_lociStitched	chrX	37604566	37657150	7	25778	44780.5	3796.56	CYBB	DYNLT3	CYBB	699	0
3_MACS_peak_24197_lociStitched	chr6	6307371	6335292	3	13204	45234.8	4291.46	F13A1		F13A1	700	0
2_MACS_peak_8447_lociStitched	chr14	77582248	77592190	2	9709	42728.7	1827.34	KIAA1737	ZDHHC22	ZDHHC22	701	0
1_MACS_peak_5950_lociStitched	chr12	27088124	27096465	1	8342	42855.2	1958.47	FGFR1OP2,C12orf11		FGFR1OP2	702	0
2_MACS_peak_1215_lociStitched	chr1	68137985	68153838	2	12940	43733.7	2937.56	GADD45A		GADD45A	703	0
7_MACS_peak_9527_lociStitched	chr15	70270578	70309740	7	24151	44742.6	4061.1			MIR629	704	0
6_MACS_peak_8453_lociStitched	chr14	77813732	77844161	6	14390	44995.4	4348.3	SAMD15,TMED8	C14orf148,POMT2,GSTZ1	TMED8	705	0
5_MACS_peak_28883_lociStitched	chr9	37187165	37216118	5	22070	45540.2	4895.95	ZCCHC7		ZCCHC7	706	0
10_MACS_peak_29937_lociStitched	chrX	7000536	7066955	10	32416	44872.7	4237.53	HDHD1		HDHD1	707	0
3_MACS_peak_17817_lociStitched	chr20	36403436	36436969	3	13241	44967.8	4429.71	CTNNBL1		CTNNBL1	708	0
6_MACS_peak_23173_lociStitched	chr5	96196180	96233971	6	23109	46399.8	5868.94	ERAP2	ERAP1,LNPEP	ERAP2	709	0
7_MACS_peak_2222_lociStitched	chr1	178670209	178698686	7	20719	45130.3	4624.66	RALGPS2		RALGPS2	710	0
9_MACS_peak_28976_lociStitched	chr9	74381651	74432908	9	20326	46418.3	5915.06	TMEM2		TMEM2	711	0
7_MACS_peak_13411_lociStitched	chr18	74677239	74717494	7	19223	46156.4	5696.08	MBP,ZNF236	MBP	MBP	712	0
2_MACS_peak_18993_lociStitched	chr22	30697110	30709465	2	11984	42648.2	2236.26	TBC1D10A	OSM,GATSL3,SF3A1,CCDC157	GATSL3	713	0
2_MACS_peak_27050_lociStitched	chr7	128774222	128787647	2	11013	44129.3	3752.29	TSPAN33	LOC407835,SMO	TSPAN33	714	0
5_MACS_peak_15164_lociStitched	chr2	9674988	9697458	5	19746	44054.7	3689.57	ADAM17		ADAM17	715	0
6_MACS_peak_9920_lociStitched	chr15	100012535	100053962	6	21384	45358.4	5004.38			MEF2A	716	0
4_MACS_peak_5381_lociStitched	chr11	117856111	117883699	4	15227	43616.6	3294.01	IL10RA		IL10RA	717	0
4_MACS_peak_22739_lociStitched	chr5	17254314	17283951	4	24202	45344.6	5097.56	BASP1	LOC285696	BASP1	718	0
3_MACS_peak_9801_lociStitched	chr15	86227656	86263084	3	21788	45744.6	5516.14	AKAP13		AKAP13	719	0
7_MACS_peak_12521_lociStitched	chr17	65796197	65827261	7	22482	44225.8	4060.06	BPTF		BPTF	720	0
8_MACS_peak_24369_lociStitched	chr6	24492681	24526929	8	20096	44433.4	4301.55	ALDH5A1	GPLD1	ALDH5A1	721	0
3_MACS_peak_25602_lociStitched	chr6	158701077	158714991	3	13401	42848.2	2722.97		TULP4	TULP4	722	0
1_MACS_peak_13248_lociStitched	chr18	48714062	48725228	1	11167	43364.3	3239.26	MEX3C		MEX3C	723	0
6_MACS_peak_4808_lociStitched	chr11	64529514	64572172	6	22433	44816.5	4769.16	SF1,MEN1,MAP4K2	RASGRP2,PYGM,MEN1,NRXN2,CDC42BPG	SF1	724	0
6_MACS_peak_29902_lociStitched	chrX	2409324	2440752	6	16776	42892.9	2863.09	DHRSX,ZBED1		DHRSX	725	0
3_MACS_peak_3417_lociStitched	chr10	61988160	61999902	3	11499	42661	2639.6	ANK3		ANK3	726	0
8_MACS_peak_180_lociStitched	chr1	9459541	9489870	8	21977	43325	3393.82			SPSB1	727	0
6_MACS_peak_485_lociStitched	chr1	24213546	24243785	6	17464	43244.8	3329.31	CNR2	PNRC2,FUCA1	CNR2	728	0
2_MACS_peak_18135_lociStitched	chr20	52480057	52490645	2	10042	42248.2	2391.83		SUMO1P1	SUMO1P1	729	0
4_MACS_peak_27116_lociStitched	chr7	130903204	130921259	4	13501	43019.6	3249.9	MKLN1		MKLN1	730	0
3_MACS_peak_12995_lociStitched	chr18	10474702	10492789	3	17722	45492.4	5724.54	APCDD1	NAPG	APCDD1	731	0
9_MACS_peak_15950_lociStitched	chr2	85115365	85175084	9	19604	45010.2	5392.63	TMSB10	C2orf89,KCMF1	TMSB10	732	0
3_MACS_peak_29167_lociStitched	chr9	98253719	98279451	3	16372	44086.6	4564.86	PTCH1	PTCH1	PTCH1	733	0
3_MACS_peak_7963_lociStitched	chr14	38589127	38608770	3	14678	42764.8	3288.24			SSTR1	734	0
4_MACS_peak_8903_lociStitched	chr15	31546172	31566385	4	15446	41808.6	2350.77			KLF13	735	0
1_MACS_peak_5929_lociStitched	chr12	25203449	25212480	1	9032	41306.9	2057.26	LRMP		LRMP	736	0
3_MACS_peak_4030_lociStitched	chr10	118596384	118610406	3	12909	42105.3	2868.9			HSPA12A	737	0
4_MACS_peak_12945_lociStitched	chr18	3703574	3727843	4	19742	41524.3	2439.03	DLGAP1		FLJ35776	738	0
7_MACS_peak_14182_lociStitched	chr19	19256661	19286331	7	22086	42083.9	3056.01	MEF2B,LOC729991-MEF2B	TMEM161A,LOC729991,NCAN,NR2C2AP,RFXANK	MEF2B	739	0
6_MACS_peak_9599_lociStitched	chr15	74906353	74955475	6	18679	44116.5	5098.86	CLK3,EDC3		CLK3	740	0
7_MACS_peak_6084_lociStitched	chr12	47583621	47620284	7	20687	44006.6	5085.16	LOC100233209,FAM113B		FAM113B	741	0
4_MACS_peak_23835_lociStitched	chr5	158234906	158257422	4	22298	44144.9	5266.49	EBF1		EBF1	742	0
2_MACS_peak_5827_lociStitched	chr12	10692068	10715712	2	12148	42921	4062.04		KLRAP1	KLRAP1	743	0
5_MACS_peak_10572_lociStitched	chr16	30193731	30227635	5	17433	44668.5	5814.54	SLX1B,LOC606724,SULT1A4,SULT1A3,CORO1A,BOLA2B,SLX1A-SULT1A3,LOC388242	LOC613037,CORO1A	CORO1A	744	0
5_MACS_peak_17514_lociStitched	chr20	5566729	5592304	5	19302	43544	4762.06	GPCPD1		GPCPD1	745	0
4_MACS_peak_1928_lociStitched	chr1	157596060	157630604	4	23015	44337.2	5654.85		FCRL4,FCRL3	FCRL4	746	0
4_MACS_peak_28793_lociStitched	chr9	34114252	34128007	4	8844	40111	1431.9	DCAF12		DCAF12	747	0
1_MACS_peak_13168_lociStitched	chr18	42679857	42688607	1	8751	41239.6	2577.75			MIR4319	748	0
3_MACS_peak_23467_lociStitched	chr5	130965345	130985004	3	14433	41688.9	3039.28	FNIP1,RAPGEF6		RAPGEF6	749	0
1_MACS_peak_9241_lociStitched	chr15	56822121	56832498	1	10378	40586.5	1945.69			MNS1	750	0
3_MACS_peak_15638_lociStitched	chr2	55223707	55247678	3	16653	43600.9	5045.9	RTN4		RTN4	751	0
7_MACS_peak_18973_lociStitched	chr22	29758513	29785529	7	20517	41629	3117.65	AP1B1	RASL10A,MIR3653,RFPL1,SNORD125	AP1B1	752	0
4_MACS_peak_14474_lociStitched	chr19	39887908	39904904	4	15586	41402.3	2993	ZFP36,PLEKHG2,MED29	SUPT5H,RPS16,PAF1	ZFP36	753	0
3_MACS_peak_27146_lociStitched	chr7	134831135	134857027	3	12890	43294	4885.82	TMEM140,C7orf49	C7orf49,WDR91	TMEM140	754	0
3_MACS_peak_26253_lociStitched	chr7	47605558	47623042	3	16692	42190.6	3865.71		TNS3	TNS3	755	0
3_MACS_peak_18827_lociStitched	chr22	23477592	23499750	3	13992	41373.4	3048.94	RTDR1,RAB36	BCR	RAB36	756	0
7_MACS_peak_22785_lociStitched	chr5	35854111	35910061	7	24305	46153.2	7844.19	IL7R,CAPSL		IL7R	757	0
2_MACS_peak_16813_lociStitched	chr2	179911396	179925521	2	8787	40343.8	2086.26	CCDC141		CCDC141	758	0
1_MACS_peak_20556_lociStitched	chr3	111257238	111270379	1	13142	41072.2	2859.48	CD96	CD96,ZBED2	CD96	759	0
3_MACS_peak_16227_lociStitched	chr2	103029425	103060135	3	16083	42306.1	4115.14	IL18RAP	SLC9A4	IL18RAP	760	0
4_MACS_peak_19016_lociStitched	chr22	31680489	31705045	4	15474	41430.9	3280.68	PIK3IP1	PATZ1,LIMK2	PIK3IP1	761	0
1_MACS_peak_20788_lociStitched	chr3	136467221	136473086	1	5866	40286.7	2215.21	STAG1		STAG1	762	0
2_MACS_peak_16196_lociStitched	chr2	100750817	100767585	2	12009	40865.3	2798.58	AFF3	AFF3	AFF3	763	0
6_MACS_peak_6050_lociStitched	chr12	42839857	42873543	6	20286	41811.1	3769.46	PPHLN1,PRICKLE1		PRICKLE1	764	0
2_MACS_peak_28949_lociStitched	chr9	71250642	71264720	2	12797	40758.6	2743.8			PIP5K1B	765	0
1_MACS_peak_3276_lociStitched	chr10	30988169	30996354	1	8186	40210.4	2206.68			LYZL2	766	0
3_MACS_peak_21969_lociStitched	chr4	86508562	86533251	3	14408	41741.7	3752.73	ARHGAP24		ARHGAP24	767	0
4_MACS_peak_1805_lociStitched	chr1	154809695	154843463	4	19015	42115.4	4177.1	KCNN3		KCNN3	768	0
MACS_peak_14968	chr19	55762223	55772453	1	10231	39565.5	1637.82	PPP6R1	TMEM86B,PTPRH,BRSK1,HSPBP1	PPP6R1	769	0
6_MACS_peak_16282_lociStitched	chr2	111947948	111985460	6	26543	42669.9	4805.29			BCL2L11	770	0
3_MACS_peak_19090_lociStitched	chr22	36541053	36561278	3	15579	40840.3	3029.7	APOL3	APOL3,APOL4	APOL3	771	0
1_MACS_peak_1893_lociStitched	chr1	156115647	156129598	1	13952	39959.8	2151.24	SEMA4A	LMNA,SEMA4A,SLC25A44	SEMA4A	772	0
5_MACS_peak_22245_lociStitched	chr4	124362665	124401084	5	19341	43444.2	5643.75		SPRY1	SPRY1	773	0
2_MACS_peak_28068_lociStitched	chr8	91637109	91659389	2	12527	42216.1	4625.33	TMEM64	TMEM64	TMEM64	774	0
4_MACS_peak_23135_lociStitched	chr5	88025568	88045695	4	16989	41077.2	3520.21	MEF2C	LOC645323	LOC645323	775	0
4_MACS_peak_27726_lociStitched	chr8	42740190	42756181	4	14561	41902.8	4349.55	HOOK3,RNF170	THAP1,RNF170	RNF170	776	0
2_MACS_peak_2815_lociStitched	chr1	234734270	234750614	2	11051	40632.8	3187.08	IRF2BP2	NCRNA00184	IRF2BP2	777	0
2_MACS_peak_6482_lociStitched	chr12	75864571	75879326	2	12723	40667.7	3237.25	GLIPR1	KRR1	GLIPR1	778	0
2_MACS_peak_4240_lociStitched	chr11	2398437	2423013	2	20747	39535.4	2113.54	CD81	KCNQ1,TSSC4,TRPM5	CD81	779	0
4_MACS_peak_13250_lociStitched	chr18	51734736	51752008	4	15716	41309.4	3974.29	MBD2,SNORA37	POLI	SNORA37	780	0
4_MACS_peak_1092_lociStitched	chr1	53092874	53108129	4	13804	39412.8	2175.36	FAM159A	GPX7	FAM159A	781	0
6_MACS_peak_30173_lociStitched	chrX	39610103	39637337	6	21291	39208.8	1971.74			BCOR	782	0
10_MACS_peak_25503_lociStitched	chr6	150999272	151053057	10	28560	45765.7	8562.57	PLEKHG1		PLEKHG1	783	0
1_MACS_peak_5797_lociStitched	chr12	9799368	9806678	1	7311	38959.4	1833.35	LOC374443	CLEC2D,KLRB1	LOC374443	784	0
6_MACS_peak_18259_lociStitched	chr20	62256920	62274706	6	15590	39474.2	2358.42	STMN3,GMEB2	RTEL1	GMEB2	785	0
MACS_peak_2560	chr1	207993302	208003077	1	9776	38916.2	1811.31	LOC148696	MIR29C,MIR29B2	LOC148696	786	0
4_MACS_peak_2365_lociStitched	chr1	198491568	198526949	4	16721	42528	5643.27	ATP6V1G3	ATP6V1G3	ATP6V1G3	787	0
2_MACS_peak_27270_lociStitched	chr7	150587702	150597011	2	8765	38888.3	2019.12		ABP1	ABP1	788	0
4_MACS_peak_20645_lociStitched	chr3	121781757	121812030	4	16123	41813.1	4958.72	CD86	ILDR1	CD86	789	0
8_MACS_peak_28585_lociStitched	chr9	610981	658695	8	26515	43758.5	6918.53	KANK1	KANK1	KANK1	790	0
3_MACS_peak_6273_lociStitched	chr12	55377003	55395631	3	11397	40035.3	3224.51	KIAA0748	NEUROD4,KIAA0748	KIAA0748	791	0
MACS_peak_16451	chr2	131126083	131139637	1	13555	39290.3	2483.09	PTPN18	IMP4,CCDC115,PTPN18	PTPN18	792	0
2_MACS_peak_16811_lociStitched	chr2	179884131	179898888	2	11356	39479.4	2811.21	CCDC141		CCDC141	793	0
3_MACS_peak_28208_lociStitched	chr8	110531214	110564687	3	14468	42735	6108.82	EBAG9,PKHD1L1		EBAG9	794	0
1_MACS_peak_19203_lociStitched	chr22	38786489	38797441	1	10953	40108.4	3532.02	LOC400927	KCNJ4	LOC400927	795	0
2_MACS_peak_22948_lociStitched	chr5	65219940	65235009	2	10628	39083	2521.04	ERBB2IP	LOC100303749	ERBB2IP	796	0
8_MACS_peak_23457_lociStitched	chr5	130585570	130625209	8	25818	42457.3	5898.28	CDC42SE2		CDC42SE2	797	0
2_MACS_peak_27903_lociStitched	chr8	66741830	66755737	2	12565	39712.8	3177.75	PDE7A	PDE7A	PDE7A	798	0
2_MACS_peak_10791_lociStitched	chr16	64345986	64366975	2	15955	39492.9	2974.14			CDH11	799	0
1_MACS_peak_2375_lociStitched	chr1	198897362	198908215	1	10854	39240.1	2753.41			MIR181A1	800	0
4_MACS_peak_28193_lociStitched	chr8	103817959	103844018	4	17949	40334.1	3880.19	AZIN1		AZIN1	801	0
5_MACS_peak_9497_lociStitched	chr15	69108355	69145637	5	19067	41226.4	4816.83	MIR548H4,ANP32A	MIR4312,C15orf28	MIR548H4	802	0
4_MACS_peak_28171_lociStitched	chr8	103241956	103255477	4	11552	38567.3	2224.2	RRM2B		RRM2B	803	0
4_MACS_peak_4570_lociStitched	chr11	47413844	47430866	4	13773	38876.5	2565.22	SLC39A13	PSMC3,SLC39A13,RAPSN,MYBPC3,SPI1	SLC39A13	804	0
8_MACS_peak_9775_lociStitched	chr15	85922325	85958552	8	21908	42095.8	5814.43	AKAP13	AKAP13	AKAP13	805	0
MACS_peak_11484	chr17	7735833	7749043	1	13211	38793.8	2544.25	DNAH2,KDM6B	LSMD1,CYB5D1,CHD3,TMEM88	KDM6B	806	0
5_MACS_peak_21614_lociStitched	chr4	26986216	27011889	5	18703	38892	2754.71	STIM2		STIM2	807	0
4_MACS_peak_15653_lociStitched	chr2	55635208	55653546	4	13288	39289.2	3174.31	CCDC88A	CCDC88A	CCDC88A	808	0
6_MACS_peak_22414_lociStitched	chr4	154385092	154420489	6	26361	42487	6459.95	KIAA0922	KIAA0922	KIAA0922	809	0
13_MACS_peak_1353_lociStitched	chr1	93409338	93460102	13	28163	43367.7	7376.01	FAM69A		FAM69A	810	0
7_MACS_peak_5715_lociStitched	chr12	6711704	6754071	7	18168	39320.8	3338.52	LPAR5,ACRBP,CHD4	IFFO1,ZNF384,NOP2,SCARNA11,ING4	LPAR5	811	0
4_MACS_peak_27159_lociStitched	chr7	138778539	138804490	4	15442	40740.5	4821.7	ZC3HAV1	TTC26	ZC3HAV1	812	0
4_MACS_peak_21105_lociStitched	chr3	182107765	182133008	4	23001	42307.3	6457.16			ATP11B	813	0
8_MACS_peak_2438_lociStitched	chr1	203420431	203458950	8	24896	39786.3	4036.79	PRELP	PRELP,OPTC	PRELP	814	0
1_MACS_peak_20847_lociStitched	chr3	143688549	143698655	1	10107	40121.8	4391.06	C3orf58		C3orf58	815	0
8_MACS_peak_829_lociStitched	chr1	36816231	36864027	8	23296	40177.3	4473.71	LSM10,STK40	C1orf113,FAM176B	STK40	816	0
MACS_peak_16453	chr2	131142181	131150576	1	8396	37269.6	1568.19		IMP4,CCDC115,PTPN18	PTPN18	817	0
9_MACS_peak_24276_lociStitched	chr6	13448005	13489016	9	27476	40797.7	5097.67	C6orf114,GFOD1		C6orf114	818	0
4_MACS_peak_17858_lociStitched	chr20	39554271	39575004	4	15856	38385.1	2697.36			TOP1	819	0
8_MACS_peak_6028_lociStitched	chr12	32668209	32704753	8	18198	40702.7	5035.76	FGD4		FGD4	820	0
2_MACS_peak_2070_lociStitched	chr1	167295538	167312798	2	9086	38410.4	2749.52	POU2F1		POU2F1	821	0
10_MACS_peak_22854_lociStitched	chr5	49789205	49856849	10	20294	46809.6	11208.6			EMB	822	0
11_MACS_peak_24076_lociStitched	chr5	180575909	180620045	11	24087	41055.3	5455.21	OR2V2	TRIM41,TRIM7,SNORD96A	OR2V2	823	0
5_MACS_peak_10013_lociStitched	chr16	1754635	1774304	5	17485	38224.7	2645.48	MAPK8IP3	MRPS34,HN1L,MAPK8IP3,MIR3177,EME2,NME3	MAPK8IP3	824	0
4_MACS_peak_12144_lociStitched	chr17	44424937	44452574	4	10539	40842	5425.14	NSFP1,ARL17B,ARL17A		ARL17B	825	0
3_MACS_peak_970_lociStitched	chr1	44296031	44319847	3	12554	38358	2943.66	ST3GAL3		ARTN	826	0
8_MACS_peak_23530_lociStitched	chr5	133859440	133892285	8	19911	38835.9	3445.44	PHF15		PHF15	827	0
4_MACS_peak_12153_lociStitched	chr17	44642872	44670495	4	10541	40848.9	5483.17	ARL17A,NSFP1,NSF		NSF	828	0
1_MACS_peak_15576_lociStitched	chr2	47878371	47891584	1	13214	37473.4	2160.33			KCNK12	829	0
MACS_peak_28879	chr9	37119511	37129640	1	10130	38882.2	3625.17	ZCCHC7	LOC100506710	ZCCHC7	830	0
MACS_peak_5698	chr12	6549436	6557820	1	8385	36457	1211.49	LOC678655,CD27	NCAPD2,VAMP1,MRPL51,TAPBPL	CD27	831	0
2_MACS_peak_20534_lociStitched	chr3	107841294	107854239	2	10267	37969	2724.92		CD47	CD47	832	0
6_MACS_peak_24696_lociStitched	chr6	35630219	35657495	6	18975	39861.1	4653.29	FKBP5	C6orf81,LOC285847	FKBP5	833	0
7_MACS_peak_16727_lociStitched	chr2	172172226	172204804	7	21273	40706.2	5515.46	METTL8		TLK1	834	0
4_MACS_peak_15664_lociStitched	chr2	60563189	60599852	4	16325	40054.3	4868.85			BCL11A	835	0
1_MACS_peak_28399_lociStitched	chr8	135693196	135705737	1	12542	38675.2	3679.53	ZFAT		ZFAT	836	0
7_MACS_peak_27649_lociStitched	chr8	37247635	37279433	7	17506	39944.6	5033.62			ZNF703	837	0
3_MACS_peak_16200_lociStitched	chr2	100850277	100877572	3	14555	37893.6	3084.34			LONRF2	838	0
8_MACS_peak_3940_lociStitched	chr10	105579645	105619404	8	20388	38737.2	3936.14	SH3PXD2A		SH3PXD2A	839	0
5_MACS_peak_884_lociStitched	chr1	40504196	40531947	5	15598	38709.9	3948.97	CAP1	PPT1	CAP1	840	0
5_MACS_peak_27024_lociStitched	chr7	128145082	128184011	5	13251	43826.3	9074.35		METTL2B,C7orf68	METTL2B	841	0
12_MACS_peak_4602_lociStitched	chr11	47920875	47973395	12	21448	40277.6	5582.88		PTPRJ	PTPRJ	842	0
2_MACS_peak_13165_lociStitched	chr18	42330862	42342646	2	7467	36702.4	2057.49	SETBP1		SETBP1	843	0
3_MACS_peak_27343_lociStitched	chr7	158319976	158337140	3	12258	37920.4	3292.06	MIR595,PTPRN2	PTPRN2	MIR595	844	0
3_MACS_peak_20782_lociStitched	chr3	135901058	135916905	3	12772	39381.4	4766.78	MSL2		MSL2	845	0
2_MACS_peak_15255_lociStitched	chr2	16830671	16848154	2	17226	37897.9	3304.29	FAM49A		FAM49A	846	0
3_MACS_peak_6066_lociStitched	chr12	45221680	45248605	3	16116	38642.8	4089.91	NELL2	NELL2	NELL2	847	0
7_MACS_peak_27088_lociStitched	chr7	130581308	130656335	7	27225	53419.2	18891.8	FLJ43663,LOC646329	MIR29A,MIR29B1	LOC646329	848	0
3_MACS_peak_24056_lociStitched	chr5	180228625	180244447	3	11394	36610.5	2208.75	MGAT1	LOC729678,MGAT1,ZFP62	MGAT1	849	0
2_MACS_peak_4369_lociStitched	chr11	10625325	10646155	2	12292	37400.3	3078.67	MRVI1	LYVE1	MRVI1	850	0
1_MACS_peak_25193_lociStitched	chr6	107809109	107821007	1	11899	36747	2428.38	SOBP	PDSS2	SOBP	851	0
2_MACS_peak_10304_lociStitched	chr16	14696040	14705849	2	7675	35487	1248.69	PARN	BFAR	PARN	852	0
4_MACS_peak_1530_lociStitched	chr1	113476618	113503541	4	13270	37993.7	3763.84	SLC16A1	AKR7A2P1	SLC16A1	853	0
7_MACS_peak_28324_lociStitched	chr8	126579403	126623983	7	20526	41040.3	6820.74			TRIB1	854	0
8_MACS_peak_30601_lociStitched	chrX	118799220	118828651	8	18106	36376.7	2239.7	SEPT6	MIR766	SEPT6	855	0
4_MACS_peak_27500_lociStitched	chr8	18938067	18956989	4	16149	35594.2	1462.67			PSD3	856	0
3_MACS_peak_1811_lociStitched	chr1	154907698	154929572	3	15423	37080.8	2974.86	PMVK,PBXIP1,PYGO2	MIR4258,FLAD1,ZBTB7B,SHC1,CKS1B,LENEP	PMVK	857	0
4_MACS_peak_1355_lociStitched	chr1	93486760	93505247	4	17300	37343.7	3240.77		MTF2	MTF2	858	0
3_MACS_peak_8578_lociStitched	chr14	92327252	92356573	3	13328	36689.4	2650.62	FBLN5,TC2N	TC2N	TC2N	859	0
6_MACS_peak_26165_lociStitched	chr7	39987478	40025865	6	18763	40482.9	6449.02	CDK13		CDK13	860	0
2_MACS_peak_26379_lociStitched	chr7	64936248	64944863	2	8614	35928	1898.75			ZNF92	861	0
5_MACS_peak_27421_lociStitched	chr8	8181956	8221365	5	20273	36701.6	2691.63	SGK223		SGK223	862	0
5_MACS_peak_2152_lociStitched	chr1	173375232	173400550	5	15669	37640.3	3681.24		PRDX6,LOC646870	LOC646870	863	0
4_MACS_peak_24981_lociStitched	chr6	73328735	73364361	4	17541	39637.5	5693.03	KCNQ5	KCNQ5	KCNQ5	864	0
5_MACS_peak_12431_lociStitched	chr17	60529317	60569010	5	13398	42455.6	8545.9	TLK2	METTL2A	TLK2	865	0
1_MACS_peak_1267_lociStitched	chr1	84763157	84770938	1	7782	35950.6	2044.07	SAMD13		SAMD13	866	0
1_MACS_peak_8670_lociStitched	chr14	100529979	100541285	1	11307	35930.5	2053.17	EVL		EVL	867	0
1_MACS_peak_29750_lociStitched	chr9	137819983	137830456	1	10474	35344.3	1530.11		FCN2,FCN1	FCN1	868	0
3_MACS_peak_11776_lociStitched	chr17	29132754	29153293	3	15259	36787.4	3062.36	CRLF3	ATAD5	CRLF3	869	0
8_MACS_peak_19149_lociStitched	chr22	37613907	37663895	8	19037	38180.8	4498.92	RAC2	CYTH4,SSTR3,C1QTNF6	RAC2	870	0
3_MACS_peak_4231_lociStitched	chr11	1536441	1548405	3	11295	35786.7	2109.25	MOB2	MOB2,LOC338651,DUSP8	MOB2	871	0
1_MACS_peak_7225_lociStitched	chr13	30943847	30952090	1	8244	35599.9	1944.52	LOC100188949		LOC100188949	872	0
3_MACS_peak_27481_lociStitched	chr8	12607676	12625493	3	15215	35160.1	1521.57	LOC340357,LONRF1	MIR3926-2,MIR3926-1	LONRF1	873	0
3_MACS_peak_14761_lociStitched	chr19	48746468	48763493	3	11690	37054.9	3447.56	CARD8	CARD8,ZNF114	CARD8	874	0
1_MACS_peak_7599_lociStitched	chr13	74859813	74865903	1	6091	36787.3	3223.44			KLF12	875	0
5_MACS_peak_23559_lociStitched	chr5	136389941	136412648	5	10462	36163.2	2631.74	SPOCK1		SPOCK1	876	0
2_MACS_peak_3980_lociStitched	chr10	112369136	112380228	2	11071	35604.2	2099.72		SMC3,RBM20	RBM20	877	0
6_MACS_peak_15115_lociStitched	chr2	3697920	3716273	6	16448	36329.8	2846.55	ALLC		ALLC	878	0
1_MACS_peak_22191_lociStitched	chr4	114677168	114685158	1	7991	35257.5	1796.95	CAMK2D		CAMK2D	879	0
4_MACS_peak_7432_lociStitched	chr13	49050076	49081577	4	15085	39099	5648.13	RB1,RCBTB2	LPAR6	RCBTB2	880	0
4_MACS_peak_25687_lociStitched	chr6	166873337	166902807	4	12811	37052.6	3654.28	RPS6KA2	MIR1913	MIR1913	881	0
4_MACS_peak_2547_lociStitched	chr1	207077811	207104991	4	11958	37715	4318.9	FAIM3,PIGR	IL20,FAIM3,IL24,FCAMR	FAIM3	882	0
9_MACS_peak_1860_lociStitched	chr1	155498656	155534784	9	19601	37558.7	4176.4	LOC645676,ASH1L	MSTO1	LOC645676	883	0
4_MACS_peak_29132_lociStitched	chr9	96212427	96230300	4	15772	36343	2972.28	FAM120A,FAM120AOS		FAM120AOS	884	0
1_MACS_peak_20536_lociStitched	chr3	107935545	107943893	1	8349	35494	2173.82	IFT57		IFT57	885	0
MACS_peak_6941	chr12	122236807	122245872	1	9066	35136.8	1824.78	LOC338799,SETD1B	RHOF	LOC338799	886	0
4_MACS_peak_8481_lociStitched	chr14	81395145	81427185	4	19093	37794.4	4533.66	C14orf145,TSHR		C14orf145	887	0
1_MACS_peak_6176_lociStitched	chr12	51314170	51322891	1	8722	35063.7	1811.35	METTL7A	HIGD1C	METTL7A	888	0
7_MACS_peak_11917_lociStitched	chr17	37023505	37056146	7	19287	36995.3	3753.72	LASP1	SNORA21,CWC25,C17orf98,RPL23	LASP1	889	0
1_MACS_peak_6072_lociStitched	chr12	46118093	46128004	1	9912	35424.9	2185.38	ARID2,LOC400027		ARID2	890	0
5_MACS_peak_27863_lociStitched	chr8	61674054	61715234	5	24952	40813.5	7585.36	CHD7		CHD7	891	0
3_MACS_peak_26152_lociStitched	chr7	37375421	37393571	3	11205	37528.8	4308.81	ELMO1		ELMO1	892	0
10_MACS_peak_24341_lociStitched	chr6	18379499	18414146	10	19885	38049.3	4829.79	RNF144B		RNF144B	893	0
3_MACS_peak_3968_lociStitched	chr10	111966490	111987914	3	12927	36086.6	2892.24	MXI1		MXI1	894	0
1_MACS_peak_7509_lociStitched	chr13	51482164	51492260	1	10097	36222.4	3070.19	RNASEH2B		RNASEH2B	895	0
7_MACS_peak_17682_lociStitched	chr20	30935772	30957201	7	17284	36300.7	3173.63	ASXL1		ASXL1	896	0
2_MACS_peak_25933_lociStitched	chr7	16792535	16811962	2	11618	37692.3	4594.49	TSPAN13	AGR2	TSPAN13	897	0
4_MACS_peak_15236_lociStitched	chr2	12848674	12869765	4	15468	37329	4287.8	TRIB2	MIR3125	TRIB2	898	0
3_MACS_peak_12078_lociStitched	chr17	42274701	42299838	3	13662	35752.4	2712.28	UBTF,ATXN7L3	TMUB2,C17orf65,ASB16,SLC4A1	UBTF	899	0
7_MACS_peak_15416_lociStitched	chr2	33699994	33723095	7	17930	36878.4	3927.17	RASGRP3	RASGRP3	RASGRP3	900	0
2_MACS_peak_25571_lociStitched	chr6	157097380	157113595	2	12505	35849.7	2939.78	ARID1B		ARID1B	901	0
MACS_peak_17594	chr20	17943003	17954836	1	11834	35301.4	2487.3	C20orf72,SNX5,SNORD17		SNX5	902	0
2_MACS_peak_816_lociStitched	chr1	36688241	36702648	2	11424	35095.5	2335.37	THRAP3		THRAP3	903	0
3_MACS_peak_29664_lociStitched	chr9	134127341	134154175	3	15694	35316.2	2686.08	FAM78A	PPAPDC3	FAM78A	904	0
1_MACS_peak_13436_lociStitched	chr18	77153202	77166851	1	13650	34739.4	2122.42	NFATC1	NFATC1	NFATC1	905	0
5_MACS_peak_19167_lociStitched	chr22	37867748	37890373	5	17476	34878.7	2273.81	CARD10,MFNG	ELFN2	MFNG	906	0
MACS_peak_4941	chr11	67167532	67181067	1	13536	35488.8	2904.61	PPP1CA,TBC1D10C	CLCF1,PPP1CA,CABP4,RPS6KB2,PTPRCAP,CORO1B,GPR152,CARNS1,POLD4,RAD9A	TBC1D10C	907	0
3_MACS_peak_1608_lociStitched	chr1	121174273	121203287	3	10193	37956.1	5387.9			EMBP1	908	0
7_MACS_peak_16252_lociStitched	chr2	108191207	108226512	7	18316	36042.9	3488.13			LOC729121	909	0
MACS_peak_24610	chr6	32934222	32939905	1	5684	34003.1	1461.67	BRD2	HLA-DMA,BRD2,HLA-DOA,HLA-DMB	BRD2	910	0
3_MACS_peak_24162_lociStitched	chr6	5485823	5509795	3	11631	35934	3404.02	FARS2		FARS2	911	0
1_MACS_peak_24020_lociStitched	chr5	177539553	177549949	1	10397	34319.3	1831.78	N4BP3	NHP2,RMND5B	N4BP3	912	0
2_MACS_peak_24418_lociStitched	chr6	26155079	26176323	2	11938	35624.1	3154.73	HIST1H2BD,HIST1H1E	HIST1H2BG,HIST1H4D,HIST1H2AC,HIST1H3E,HIST1H2BE,HIST1H3D,HIST1H2BC,HIST1H4E,HIST1H2BF,HIST1H2AE,HIST1H1T,HIST1H2AD	HIST1H2BD	913	0
6_MACS_peak_3665_lociStitched	chr10	81932962	81966341	6	14499	36843.7	4386	ANXA11	ANXA11,PLAC9	ANXA11	914	0
5_MACS_peak_23082_lociStitched	chr5	79431329	79450266	5	17456	35287.2	2861.38	SERINC5		THBS4	915	0
4_MACS_peak_717_lociStitched	chr1	32228177	32255323	4	17801	35984.7	3577.84	BAI2	MIR4254,SPOCD1	BAI2	916	0
4_MACS_peak_28987_lociStitched	chr9	74509696	74527335	4	15714	35886.5	3513.69	C9orf85,FAM108B1		FAM108B1	917	0
5_MACS_peak_5463_lociStitched	chr11	121233616	121257293	5	15909	35139	2777.31			SORL1	918	0
1_MACS_peak_20869_lociStitched	chr3	150315511	150326479	1	10969	36031	3669.89	SELT		SELT	919	0
2_MACS_peak_21052_lociStitched	chr3	178783461	178793439	2	9765	35932.8	3628	ZMAT3		ZMAT3	920	0
1_MACS_peak_12708_lociStitched	chr17	75135544	75144661	1	9118	34179.6	1942.83	SEC14L1	SEC14L1	SEC14L1	921	0
7_MACS_peak_5559_lociStitched	chr11	129808984	129844494	7	19812	36965.9	4815.16	PRDM10	NFRKB,PRDM10,NCRNA00167	PRDM10	922	0
5_MACS_peak_30662_lociStitched	chrX	128893270	128920849	5	19304	34079.4	1949.84	SASH3,XPNPEP2		SASH3	923	0
6_MACS_peak_2516_lociStitched	chr1	206728129	206754509	6	13598	35359.8	3292.22	RASSF5	LGTN,RASSF5	RASSF5	924	0
7_MACS_peak_29221_lociStitched	chr9	101993499	102029315	7	17732	36098.9	4068.7		SEC61B,ALG2	SEC61B	925	0
4_MACS_peak_16298_lociStitched	chr2	112124135	112146639	4	13921	37732.5	5776.78	LOC541471		LOC541471	926	0
2_MACS_peak_24530_lociStitched	chr6	30646580	30659662	2	12866	34454.1	2499.97	KIAA1949,NRM	MDC1,TUBB,DHX16,C6orf136	KIAA1949	927	0
1_MACS_peak_1265_lociStitched	chr1	84606958	84614868	1	7911	34274.8	2335.82	PRKACB		PRKACB	928	0
1_MACS_peak_23153_lociStitched	chr5	90672957	90681110	1	8154	34651.9	2762.24	ARRDC3,LOC100129716		LOC100129716	929	0
1_MACS_peak_8510_lociStitched	chr14	89768226	89776868	1	8643	33907.8	2045.56	FOXN3		FOXN3	930	0
MACS_peak_15850	chr2	70309866	70318243	1	8378	33749.3	1894.04	LOC400960,PCBP1	LOC100133985	LOC400960	931	0
5_MACS_peak_29741_lociStitched	chr9	137158295	137186517	5	15406	34639.7	2822.2		RXRA	RXRA	932	0
6_MACS_peak_22921_lociStitched	chr5	59789695	59838412	6	19743	39840.8	8033.43	PART1	PDE4D	PDE4D	933	0
4_MACS_peak_16009_lociStitched	chr2	87861271	87883793	4	13939	37454.1	5650.77			NCRNA00152	934	0
7_MACS_peak_8198_lociStitched	chr14	62160825	62194422	7	20868	37588.3	5866.04	HIF1A	HIF1A,SNAPC1	HIF1A	935	0
6_MACS_peak_29670_lociStitched	chr9	134268224	134299517	6	21372	37004	5310.42		BAT2L1	BAT2L1	936	0
4_MACS_peak_9545_lociStitched	chr15	70592390	70621785	4	11387	35276.9	3589.13			TLE3	937	0
5_MACS_peak_724_lociStitched	chr1	32389370	32411159	5	18701	35141.3	3475.35	PTP4A2	PTP4A2	PTP4A2	938	0
3_MACS_peak_28632_lociStitched	chr9	5608241	5633107	3	13258	35710.1	4085.48	KIAA1432	KIAA1432	KIAA1432	939	0
5_MACS_peak_20943_lociStitched	chr3	156846174	156894818	5	14640	42247.3	10750.3	CCNL1	LOC100498859,LOC339894	CCNL1	940	0
1_MACS_peak_20495_lociStitched	chr3	104237353	104246921	1	9569	33133	1642.83			MIR548A3	941	0
2_MACS_peak_20245_lociStitched	chr3	53005514	53023680	2	9181	34346.5	2924.73	SFMBT1		SFMBT1	942	0
7_MACS_peak_611_lociStitched	chr1	27729051	27773012	7	22792	37617.4	6211.69	WASF2	GPR3,CD164L2,MAP3K6,FCN3	GPR3	943	0
1_MACS_peak_27826_lociStitched	chr8	59632940	59638222	1	5283	32727.3	1364.87			NSMAF	944	0
4_MACS_peak_2000_lociStitched	chr1	160673145	160697081	4	13867	35023.2	3698.11	CD48	SLAMF7	CD48	945	0
3_MACS_peak_4305_lociStitched	chr11	7513381	7543276	3	16969	34902.4	3581.42	OLFML1,PPFIBP2		PPFIBP2	946	0
3_MACS_peak_8263_lociStitched	chr14	65661164	65678546	3	11801	33848	2532.56			MAX	947	0
6_MACS_peak_19246_lociStitched	chr22	40572333	40613184	6	17648	37983.3	6781.27	TNRC6B	TNRC6B	TNRC6B	948	0
2_MACS_peak_2937_lociStitched	chr10	494984	505559	2	9927	33210.8	2018.77	DIP2C		C10orf108	949	0
2_MACS_peak_25462_lociStitched	chr6	146170836	146190063	2	9266	33737.6	2553.35		FBXO30	FBXO30	950	0
8_MACS_peak_14455_lociStitched	chr19	39332473	39361705	8	16795	33950	2774.12	HNRNPL,RINL	ECH1,SIRT2,NFKBIB,LGALS4	HNRNPL	951	0
1_MACS_peak_15979_lociStitched	chr2	86260990	86269801	1	8812	32213	1044.98	POLR1A	LOC90784	LOC90784	952	0
2_MACS_peak_10402_lociStitched	chr16	21651974	21669240	2	9508	34806.5	3655.21	IGSF6,METTL9	OTOA	IGSF6	953	0
3_MACS_peak_13867_lociStitched	chr19	11142243	11164111	3	12896	33385.9	2248.03	SMARCA4	LDLR,SMARCA4	LDLR	954	0
3_MACS_peak_3922_lociStitched	chr10	104936195	104954307	3	14435	33757.1	2660.65	NT5C2	NT5C2	NT5C2	955	0
5_MACS_peak_18198_lociStitched	chr20	57462872	57484130	5	16298	34469.8	3386.4	GNAS	GNAS,GNAS-AS	GNAS	956	0
3_MACS_peak_8818_lociStitched	chr14	106313539	106330453	3	10488	32801.3	1728.61			KIAA0125	957	0
3_MACS_peak_3613_lociStitched	chr10	75517863	75535660	3	13185	33979.8	2920.49	FUT11,SEC24C	BMS1P4,SEC24C,KIAA0913,NDST2,CHCHD1	FUT11	958	0
3_MACS_peak_2747_lociStitched	chr1	229460982	229488592	3	14761	34081.8	3031.58	C1orf96	SPHAR	C1orf96	959	0
3_MACS_peak_16849_lociStitched	chr2	184354960	184372144	3	10490	33546.6	2498.55			NUP35	960	0
2_MACS_peak_22878_lociStitched	chr5	53463369	53475589	2	10950	33019.7	2008.97	ARL15		ARL15	961	0
2_MACS_peak_19654_lociStitched	chr3	11676801	11697784	2	11297	34716.4	3734.97	VGLL4		VGLL4	962	0
6_MACS_peak_14205_lociStitched	chr19	19554764	19601598	6	20707	35607.9	4655.3	GATAD2A	TSSK6,CILP2,NDUFA13,YJEFN3	TSSK6	963	0
2_MACS_peak_5970_lociStitched	chr12	31469086	31485736	2	13148	33901.1	2952.05	FLJ13224,FAM60A		FLJ13224	964	0
2_MACS_peak_9808_lociStitched	chr15	89163940	89185220	2	13380	33669.2	2774.91	ISG20,AEN	MIR1179,MIR7-2	ISG20	965	0
MACS_peak_4718	chr11	61593425	61603704	1	10280	32724.2	1910.87	FADS2	MIR611,FEN1,FADS1,MIR1908,C11orf10	FADS2	966	0
5_MACS_peak_11883_lociStitched	chr17	35629599	35659050	5	14194	34652	3869.86	ACACA		ACACA	967	0
7_MACS_peak_14422_lociStitched	chr19	38441341	38479077	7	16778	35019	4275.49	SIPA1L3	WDR87	SIPA1L3	968	0
5_MACS_peak_2868_lociStitched	chr1	244815202	244832307	5	14073	33994.5	3251.66	PPPDE1		PPPDE1	969	0
1_MACS_peak_28403_lociStitched	chr8	135840936	135847684	1	6749	32595.5	1855.03		MIR30D,MIR30B	MIR30D	970	0
1_MACS_peak_5000_lociStitched	chr11	71748479	71755558	1	7080	32508.2	1799.48	NUMA1	LRTOMT,MIR3165,IL18BP	MIR3165	971	0
4_MACS_peak_6640_lociStitched	chr12	99989261	100014470	4	14520	34385.1	3680.51	ANKS1B	FAM71C	FAM71C	972	0
2_MACS_peak_10672_lociStitched	chr16	46942325	46955401	2	12983	32372.3	1668.5	GPT2		GPT2	973	0
3_MACS_peak_23869_lociStitched	chr5	158624906	158637564	3	9667	32872.8	2173.38	RNF145		RNF145	974	0
2_MACS_peak_19637_lociStitched	chr3	10428331	10442653	2	13873	32488	1797.41	MIR885,ATP2B2		MIR885	975	0
4_MACS_peak_24890_lociStitched	chr6	46593261	46623938	4	14200	34889	4224.22	SLC25A27,CYP39A1	TDRD6	CYP39A1	976	0
8_MACS_peak_9631_lociStitched	chr15	75287605	75322437	8	16872	34117.9	3469.27	PPCDC,SCAMP5	SCAMP5,RPP25	PPCDC	977	0
2_MACS_peak_10732_lociStitched	chr16	56449022	56460152	2	8050	32442.8	1801.95	AMFR	NUDT21,OGFOD1	AMFR	978	0
6_MACS_peak_15771_lociStitched	chr2	65243841	65285174	6	17571	35525.7	4997.16	SLC1A4,CEP68		CEP68	979	0
7_MACS_peak_14311_lociStitched	chr19	34840052	34858704	7	15201	32531	2018.15	GPI,KIAA0355	PDCD2L	GPI	980	0
2_MACS_peak_2165_lociStitched	chr1	174230439	174249843	2	18583	34936.9	4540.54	RABGAP1L		RABGAP1L	981	0
2_MACS_peak_28314_lociStitched	chr8	126434340	126450027	2	10259	34167.9	3833.9	TRIB1		TRIB1	982	0
5_MACS_peak_9937_lociStitched	chr15	101457744	101484055	5	22557	34796.3	4464.98	LRRK1	ALDH1A3	LRRK1	983	0
4_MACS_peak_8139_lociStitched	chr14	59761099	59798099	4	16353	35890	5598.1	DAAM1		DAAM1	984	0
2_MACS_peak_11368_lociStitched	chr17	3859448	3870699	2	10987	31952.8	1669.65	ATP2A3	P2RX1,ATP2A3	ATP2A3	985	0
7_MACS_peak_29484_lociStitched	chr9	125924808	125957186	7	18136	34981.2	4698.05	STRBP	NCRNA00287	NCRNA00287	986	0
6_MACS_peak_12297_lociStitched	chr17	53495636	53517217	6	13441	33603.8	3345.05	MMD		MMD	987	0
3_MACS_peak_8313_lociStitched	chr14	69141165	69157233	3	11712	32333.6	2151.51			ZFP36L1	988	0
2_MACS_peak_7719_lociStitched	chr13	111359869	111370790	2	8732	34396.8	4237.35	ING1	CARS2	ING1	989	0
4_MACS_peak_5802_lociStitched	chr12	9874026	9896092	4	13075	33549.1	3426.85	CLECL1	CD69	CLECL1	990	0
2_MACS_peak_16998_lociStitched	chr2	202117117	202129260	2	11990	32444.9	2336.31	CASP8	CASP8	CASP8	991	0
3_MACS_peak_20857_lociStitched	chr3	148846085	148870825	3	9736	37303	7216.66	HPS3	HLTF	HPS3	992	0
1_MACS_peak_44_lociStitched	chr1	1706404	1715253	1	8850	31737.8	1667.15	NADK	NADK,SLC35E2	NADK	993	0
2_MACS_peak_1488_lociStitched	chr1	111323254	111332220	2	8658	31507.4	1441.73			CD53	994	0
5_MACS_peak_3351_lociStitched	chr10	45931627	45966614	5	15262	34448.2	4390.87	MARCH8,ALOX5		ALOX5	995	0
MACS_peak_25742	chr7	1099444	1106995	1	7552	31198.5	1148.51	C7orf50	GPR146,GPER,MIR339	GPR146	996	0
2_MACS_peak_24189_lociStitched	chr6	5996535	6010720	2	8234	32468	2463.93	NRN1		NRN1	997	0
2_MACS_peak_20385_lociStitched	chr3	71166544	71186926	2	13656	33569.2	3579.08	FOXP1		MIR1284	998	0
8_MACS_peak_7710_lociStitched	chr13	111288696	111333827	8	16778	36583.2	6625.23	CARS2,CARKD	ING1	CARKD	999	0
3_MACS_peak_1931_lociStitched	chr1	157660725	157676136	3	12306	32423.2	2478.09	FCRL3		FCRL3	1000	0
4_MACS_peak_9128_lociStitched	chr15	45001845	45022548	4	14067	33534.7	3591.97	B2M	SPG11,PATL2,TRIM69	B2M	1001	0
4_MACS_peak_6007_lociStitched	chr12	32404994	32427927	4	13074	33429.4	3492.7	BICD1		BICD1	1002	0
8_MACS_peak_30404_lociStitched	chrX	64886895	64926342	8	17744	31936.3	2007.85	MSN		MSN	1003	0
1_MACS_peak_23692_lociStitched	chr5	143562491	143572098	1	9608	31902.9	1986.73	KCTD16	YIPF5	KCTD16	1004	0
3_MACS_peak_11075_lociStitched	chr16	85336823	85362471	3	13908	32237	2346.79			LOC400548	1005	0
4_MACS_peak_9422_lociStitched	chr15	66678101	66711147	4	15377	34103.5	4249.72	MAP2K1	SCARNA14,TIPIN	MAP2K1	1006	0
5_MACS_peak_26756_lociStitched	chr7	99935728	99968345	5	14987	35852.6	6021.1	PILRB	SPDYE3,PMS2P1,PILRA	PILRB	1007	0
3_MACS_peak_10995_lociStitched	chr16	81500060	81516515	3	10261	32187.6	2374.46	CMIP	CMIP	CMIP	1008	0
1_MACS_peak_7654_lociStitched	chr13	97873160	97879721	1	6562	32922.4	3146	MBNL2	MBNL2	MBNL2	1009	0
7_MACS_peak_13862_lociStitched	chr19	11064781	11092385	7	18400	32318.8	2558.89	SMARCA4	YIPF2,C19orf52,SMARCA4	SMARCA4	1010	0
3_MACS_peak_13102_lociStitched	chr18	30379541	30396893	3	9495	33411.3	3692.51		KLHL14	KLHL14	1011	0
1_MACS_peak_11488_lociStitched	chr17	7782789	7792046	1	9258	31803.3	2087.45	CHD3	SCARNA21,CNTROB,LOC284023,KDM6B,TRAPPC1,LSMD1,KCNAB3,CYB5D1,CHD3,TMEM88	CHD3	1012	0
6_MACS_peak_6349_lociStitched	chr12	57451554	57488819	6	18395	34119.8	4464.35	NAB2,TMEM194A	MYO1A,LRP1,TAC3,STAT6	TMEM194A	1013	0
9_MACS_peak_11328_lociStitched	chr17	2141149	2175950	9	16440	33026.1	3375.7	SMG6	SRR	SMG6	1014	0
2_MACS_peak_23143_lociStitched	chr5	88170322	88186442	2	12929	33292.6	3694.7	MEF2C	MEF2C	MEF2C	1015	0
7_MACS_peak_15927_lociStitched	chr2	75039920	75077652	7	18143	34181.4	4584.44	HK2		HK2	1016	0
2_MACS_peak_7986_lociStitched	chr14	40748171	40765999	2	8641	32095.7	2522.66			FBXO33	1017	0
4_MACS_peak_22291_lociStitched	chr4	140215756	140238484	4	15220	33044.2	3481.93	NAA15,NDUFC1	C4orf49,NDUFC1	NDUFC1	1018	0
6_MACS_peak_504_lociStitched	chr1	25061540	25079328	6	14418	31972.2	2419.17	CLIC4		CLIC4	1019	0
3_MACS_peak_23131_lociStitched	chr5	87954824	87976691	3	11459	32944.8	3422.19	LOC645323,MIR9-2		MIR9-2	1020	0
2_MACS_peak_28773_lociStitched	chr9	33808055	33821783	2	9872	31828.4	2350.23	UBE2R2	PRSS3	UBE2R2	1021	0
7_MACS_peak_18889_lociStitched	chr22	24524811	24560505	7	18502	32756.4	3301.7	CABIN1	SUSD2	SUSD2	1022	0
3_MACS_peak_13081_lociStitched	chr18	23089282	23107332	3	11477	32847.4	3395.2			ZNF521	1023	0
2_MACS_peak_5288_lociStitched	chr11	111151703	111175379	2	14742	36676.5	7237.75	C11orf93,C11orf92,C11orf53		C11orf93	1024	0
3_MACS_peak_29174_lociStitched	chr9	99160434	99183768	3	11907	32634.9	3206.09	ZNF367	SLC35D2,HABP4	ZNF367	1025	0
4_MACS_peak_8829_lociStitched	chr14	106715020	106735705	4	19036	34273	4863.04		NCRNA00226	NCRNA00226	1026	0
5_MACS_peak_21625_lociStitched	chr4	36243058	36271537	5	14738	33474.2	4098.13	ARAP2	DTHD1	ARAP2	1027	0
10_MACS_peak_13820_lociStitched	chr19	10330131	10359747	10	24353	32693.1	3334.76	S1PR2,MIR4322	ICAM4,ICAM1,DNMT1,ICAM5,MRPL4	S1PR2	1028	0
3_MACS_peak_23341_lociStitched	chr5	123367859	123395479	3	11369	32704.8	3413.83			CSNK1G3	1029	0
2_MACS_peak_25909_lociStitched	chr7	8006352	8017362	2	8930	32018.2	2737.09	GLCCI1		GLCCI1	1030	0
5_MACS_peak_5996_lociStitched	chr12	32027039	32052922	5	13754	32384.8	3105.96			C12orf35	1031	0
2_MACS_peak_20601_lociStitched	chr3	113929917	113942735	2	10546	31470.8	2211.11		ZNF80,DRD3	ZNF80	1032	0
3_MACS_peak_14731_lociStitched	chr19	47596771	47617752	3	10201	31628.9	2404.42	ZC3H4	SAE1,TMEM160	ZC3H4	1033	0
MACS_peak_1645	chr1	145434356	145442711	1	8356	31211.8	2019.4	TXNIP	LIX1L,HFE2,ANKRD34A,POLR3GL	TXNIP	1034	0
9_MACS_peak_420_lociStitched	chr1	21698127	21740070	9	15164	32719.7	3544.18		NBPF3,ECE1	ECE1	1035	0
3_MACS_peak_25196_lociStitched	chr6	107852383	107881770	3	13859	34039	4904.69	SOBP		SOBP	1036	0
1_MACS_peak_14058_lociStitched	chr19	16691967	16700771	1	8805	30434.5	1310.04	MED26	SLC35E1,CHERP	SLC35E1	1037	0
4_MACS_peak_6527_lociStitched	chr12	90088853	90126873	4	16863	34351.1	5242.96	LOC338758	ATP2B1	LOC338758	1038	0
3_MACS_peak_17851_lociStitched	chr20	39090087	39101299	3	10831	31051.6	2029.37			MAFB	1039	0
5_MACS_peak_15756_lociStitched	chr2	65065127	65100762	5	15876	33315.2	4304.71			LOC400958	1040	0
5_MACS_peak_3231_lociStitched	chr10	27069533	27109791	5	14121	34678.2	5672.35	ABI1	ABI1	ABI1	1041	0
2_MACS_peak_4936_lociStitched	chr11	67111267	67125614	2	9716	32351.1	3360.07	LOC100130987,POLD4	CLCF1,PPP1CA,TBC1D10C,SSH3,RAD9A	POLD4	1042	0
6_MACS_peak_3539_lociStitched	chr10	72299349	72345221	6	17851	34362.7	5385.37	KIAA1274	PRF1	PRF1	1043	0
3_MACS_peak_6657_lociStitched	chr12	102126874	102144146	3	9291	31051.6	2136.55	SYCP3,GNPTAB	CHPT1,SYCP3	SYCP3	1044	0
3_MACS_peak_5952_lociStitched	chr12	27140095	27165660	3	13273	32610.7	3724.82	TM7SF3	FGFR1OP2,MED21,C12orf11	TM7SF3	1045	0
2_MACS_peak_30455_lociStitched	chrX	75362552	75372226	2	9620	30484.7	1627.17		CXorf26	CXorf26	1046	0
2_MACS_peak_577_lociStitched	chr1	27018275	27033599	2	13570	31742.1	2916.16	ARID1A		ARID1A	1047	0
1_MACS_peak_4323_lociStitched	chr11	9589551	9600433	1	10883	31019.1	2212.31	WEE1		WEE1	1048	0
6_MACS_peak_12386_lociStitched	chr17	57427565	57451542	6	15522	31887	3129	YPEL2		YPEL2	1049	0
2_MACS_peak_17122_lociStitched	chr2	219260105	219272329	2	8948	30604	1913.06	SLC11A1,CTDSP1,MIR26B	C2orf62,VIL1	MIR26B	1050	0
6_MACS_peak_7763_lociStitched	chr13	114893673	114933653	6	17342	35586.2	6916.54	RASA3		RASA3	1051	0
4_MACS_peak_18885_lociStitched	chr22	24456558	24468719	4	10035	30346.6	1685.51	CABIN1		CABIN1	1052	0
3_MACS_peak_17394_lociStitched	chr2	242253521	242280165	3	16105	32902.7	4252.38	SEPT2,HDLBP	SEPT2,HDLBP,FARP2	SEPT2	1053	0
7_MACS_peak_8901_lociStitched	chr15	31492832	31532357	7	18810	33264.2	4640.23			KLF13	1054	0
1_MACS_peak_26046_lociStitched	chr7	26236546	26244533	1	7988	31641.3	3075.79	HNRNPA2B1,CBX3	NFE2L3,HNRNPA2B1	HNRNPA2B1	1055	0
3_MACS_peak_7257_lociStitched	chr13	31874938	31898986	3	10070	30312.5	1774.74	B3GALTL		B3GALTL	1056	0
4_MACS_peak_2138_lociStitched	chr1	172345443	172369069	4	12617	32367.6	3836.86	DNM3	PIGC,C1orf105	C1orf105	1057	0
10_MACS_peak_27094_lociStitched	chr7	130672631	130726003	10	33031	41865	13348.3	FLJ43663		FLJ43663	1058	0
4_MACS_peak_24129_lociStitched	chr6	3053244	3076982	4	14376	32307.4	3798.08		BPHL,LOC401233,FAM136B,RIPK1	RIPK1	1059	0
1_MACS_peak_25531_lociStitched	chr6	152617318	152624511	1	7194	30278.9	1786.02	SYNE1		SYNE1	1060	0
3_MACS_peak_29388_lociStitched	chr9	120046732	120065386	3	18157	31129.8	2661.93	ASTN2		SNORA70C	1061	0
2_MACS_peak_29578_lociStitched	chr9	130727300	130746714	2	17472	30812	2387.92	FAM102A	FAM102A,PIP5KL1,ST6GALNAC4,DPM2	FAM102A	1062	0
2_MACS_peak_26133_lociStitched	chr7	36220470	36233974	2	13493	31726.3	3330.09	EEPD1		EEPD1	1063	0
2_MACS_peak_8004_lociStitched	chr14	48386518	48405861	2	11106	31420.8	3062			MIR548Y	1064	0
4_MACS_peak_4697_lociStitched	chr11	60774722	60811056	4	11882	31160	2812.25	CD6		CD6	1065	0
5_MACS_peak_9869_lociStitched	chr15	91524398	91538991	5	13667	30659.9	2329.04	PRC1	PRC1,UNC45A,RCCD1,HDDC3,VPS33B	PRC1	1066	0
4_MACS_peak_7596_lociStitched	chr13	74629591	74651043	4	14355	34018.6	5740.56	KLF12		KLF12	1067	0
4_MACS_peak_15393_lociStitched	chr2	33129904	33144912	4	8807	30776.9	2501.83	LOC285045	LTBP1,LOC100271832	LOC100271832	1068	0
4_MACS_peak_23448_lociStitched	chr5	130542436	130560657	4	12620	31573.3	3403.68		LYRM7,HINT1,CDC42SE2	LYRM7	1069	0
6_MACS_peak_3335_lociStitched	chr10	43891193	43917380	6	17025	30879.7	2718.21	HNRNPF	FXYD4,ZNF487P	HNRNPF	1070	0
3_MACS_peak_19409_lociStitched	chr22	46448042	46477762	3	16059	31081.2	2939.31	C22orf26,LOC150381	LOC400931,MIRLET7A3,MIR3619,LOC100271722,MIRLET7B,LOC730668	C22orf26	1071	0
7_MACS_peak_18448_lociStitched	chr21	37660107	37703616	7	15162	31913.9	3772.23	DOPEY2,MORC3		MORC3	1072	0
6_MACS_peak_15283_lociStitched	chr2	24114172	24151167	6	13985	33129	5009.12	ATAD2B	UBXN2A	ATAD2B	1073	0
2_MACS_peak_28615_lociStitched	chr9	3506770	3528590	2	12639	32127.8	4014.88	RFX3		RFX3	1074	0
MACS_peak_28828	chr9	35615556	35622704	1	7149	29523.4	1450.33	CD72	TESK1,SIT1,CCDC107,C9orf100,RMRP	CD72	1075	0
10_MACS_peak_14650_lociStitched	chr19	45577479	45641291	10	19576	32735.6	4664.66	GEMIN7,ZNF296	NKPD1,GEMIN7,BLOC1S3,CLASRP,TRAPPC6A	GEMIN7	1076	0
10_MACS_peak_11292_lociStitched	chr17	1469561	1512539	10	18699	31141.9	3085.82	SLC43A2	RILP,SCARF1,LOC100306951,INPP5K,PITPNA	PITPNA	1077	0
8_MACS_peak_4575_lociStitched	chr11	47520255	47575464	8	21042	34362.1	6376.64	CELF1	CELF1,NDUFS3,PTPMT1,KBTBD4,RAPSN,FAM180B,C1QTNF4	CELF1	1078	0
1_MACS_peak_25269_lociStitched	chr6	111797979	111807252	1	9274	30494.3	2515.76	LOC643749,REV3L	LOC643749	REV3L	1079	0
6_MACS_peak_25226_lociStitched	chr6	108878250	108920193	6	19183	33780.9	5804.91	FOXO3		FOXO3	1080	0
7_MACS_peak_17382_lociStitched	chr2	242037535	242072925	7	17325	31529	3620.4	PASK,MTERFD2	PPP1R7	MTERFD2	1081	0
5_MACS_peak_27574_lociStitched	chr8	27217609	27244729	5	18166	29625.9	1814.33	PTK2B	TRIM35	PTK2B	1082	0
8_MACS_peak_14563_lociStitched	chr19	42431455	42457622	8	19257	30814.3	3024.91		RABAC1,ARHGEF1,ATP1A3	RABAC1	1083	0
3_MACS_peak_22020_lociStitched	chr4	90214561	90246640	3	20748	33586.7	5799.88	GPRIN3		GPRIN3	1084	0
5_MACS_peak_19500_lociStitched	chr22	50565192	50588076	5	16303	30536.4	2750.66	MOV10L1	MOV10L1,MLC1,TRABD,PANX2	MOV10L1	1085	0
MACS_peak_19972	chr3	39186946	39196245	1	9300	29213.7	1438.56	CSRNP1	GORASP1,XIRP1,TTC21A	CSRNP1	1086	0
5_MACS_peak_6624_lociStitched	chr12	98884234	98920514	5	14269	31545.5	3773.12	TMPO,LOC100128191	LOC121456	TMPO	1087	0
1_MACS_peak_26433_lociStitched	chr7	69061486	69069985	1	8500	30604	2832.72	AUTS2		AUTS2	1088	0
3_MACS_peak_5124_lociStitched	chr11	82616915	82644251	3	11100	32453.3	4682.66	C11orf82	PRCP	C11orf82	1089	0
4_MACS_peak_29256_lociStitched	chr9	108005919	108023427	4	15389	30828.1	3095.41	SLC44A1		SLC44A1	1090	0
1_MACS_peak_1490_lociStitched	chr1	111413047	111421839	1	8793	30034.4	2317.57	CD53		CD53	1091	0
1_MACS_peak_22009_lociStitched	chr4	89195455	89207355	1	11901	30299.8	2610.86	PPM1K		PPM1K	1092	0
6_MACS_peak_813_lociStitched	chr1	36614108	36641866	6	17910	30847.5	3161.64	MAP7D1,TRAPPC3	THRAP3,COL8A2	MAP7D1	1093	0
9_MACS_peak_22773_lociStitched	chr5	32274846	32313937	9	18939	32289.2	4628.37	MTMR12		MTMR12	1094	0
10_MACS_peak_9702_lociStitched	chr15	79206030	79245408	10	18171	31191.3	3559.77	CTSH	MORF4L1	CTSH	1095	0
4_MACS_peak_5600_lociStitched	chr12	766766	795333	4	17307	32740.6	5159.2	NINJ2		NINJ2	1096	0
6_MACS_peak_18663_lociStitched	chr22	18471217	18494142	6	17028	31001.5	3420.41	MICAL3	FLJ41941,MIR648	MIR648	1097	0
3_MACS_peak_25183_lociStitched	chr6	107421718	107440661	3	9486	30068.2	2487.22	BEND3		BEND3	1098	0
2_MACS_peak_17179_lociStitched	chr2	225381653	225393682	2	11825	30201.2	2643.97	CUL3		CUL3	1099	0
2_MACS_peak_15139_lociStitched	chr2	8613480	8629008	2	10995	30096.4	2543.49			C2orf46	1100	0
4_MACS_peak_18174_lociStitched	chr20	56000011	56027803	4	14054	29743	2198.35		RBM38	RBM38	1101	0
2_MACS_peak_8058_lociStitched	chr14	51244211	51263873	2	15420	31634.2	4111.32	NIN		NIN	1102	0
3_MACS_peak_2014_lociStitched	chr1	161004645	161018951	3	9580	29363.1	1846.9	ARHGAP30,USF1,TSTD1	ARHGAP30,KLHDC9,TSTD1,PVRL4,F11R	TSTD1	1103	0
3_MACS_peak_25112_lociStitched	chr6	91167593	91189793	3	13670	30154.3	2675.1			MAP3K7	1104	0
3_MACS_peak_19241_lociStitched	chr22	40436815	40452056	3	12295	29579.7	2103.26	TNRC6B	FAM83F	TNRC6B	1105	0
1_MACS_peak_7771_lociStitched	chr13	115043643	115049537	1	5895	29457.6	1996.89	UPF3A	ZNF828,CDC16,UPF3A	UPF3A	1106	0
4_MACS_peak_5072_lociStitched	chr11	75525004	75548238	4	11965	31986.2	4556.19	UVRAG	DGAT2	UVRAG	1107	0
1_MACS_peak_16673_lociStitched	chr2	162695644	162702904	1	7261	29000.8	1581.23	SLC4A10		SLC4A10	1108	0
6_MACS_peak_27925_lociStitched	chr8	67434114	67460418	6	16006	31122.9	3706.23		C8orf46	C8orf46	1109	0
4_MACS_peak_30415_lociStitched	chrX	65220294	65244783	4	13974	29401.5	2030.14	VSIG4,MIR223	VSIG4	MIR223	1110	0
MACS_peak_26229	chr7	45016711	45023353	1	6643	29403.5	2040.42	MYO1G,C7orf40	CCM2,SNORA9	MYO1G	1111	0
4_MACS_peak_1707_lociStitched	chr1	150120562	150138455	4	12507	30035.2	2678.58	PLEKHO1		PLEKHO1	1112	0
2_MACS_peak_18191_lociStitched	chr20	57224513	57245759	2	15472	30732.3	3380.24	STX16	NPEPL1	STX16	1113	0
5_MACS_peak_596_lociStitched	chr1	27461915	27489182	5	15549	30533.6	3192.97	SLC9A1		SLC9A1	1114	0
1_MACS_peak_11293_lociStitched	chr17	1527683	1533901	1	6219	28605.3	1264.74	SLC43A2	RILP,SCARF1	SLC43A2	1115	0
3_MACS_peak_12770_lociStitched	chr17	77773323	77788564	3	9993	29381.6	2100.21		CBX2,CBX4,CBX8	CBX8	1116	0
MACS_peak_14855	chr19	50423502	50429349	1	5848	28444.5	1167.06	NUP62,IL4I1	SIGLEC16,AKT1S1,IL4I1,NUP62,ATF5,TBC1D17,SIGLEC11	ATF5	1117	0
3_MACS_peak_7418_lociStitched	chr13	47158039	47174044	3	15740	31429	4166.1	LRCH1	LRCH1	LRCH1	1118	0
3_MACS_peak_3046_lociStitched	chr10	6239227	6251265	3	9898	29071.8	1830.98	PFKFB3	MIR3155	PFKFB3	1119	0
1_MACS_peak_24878_lociStitched	chr6	44223050	44233797	1	10748	28438.7	1230.53	SLC35B2,NFKBIE	HSP90AB1,SLC29A1,AARS2,TMEM151B,TCTE1	SLC35B2	1120	0
2_MACS_peak_20458_lociStitched	chr3	89224780	89234811	2	8175	29660.7	2455.59	EPHA3		EPHA3	1121	0
2_MACS_peak_25552_lociStitched	chr6	155732253	155743698	2	8687	29296.9	2116.18	NOX3		NOX3	1122	0
4_MACS_peak_9081_lociStitched	chr15	42887623	42925073	4	11057	30424.4	3269.39	STARD9	HAUS2,LRRC57	STARD9	1123	0
2_MACS_peak_23194_lociStitched	chr5	100223553	100242761	2	12904	31084.3	3931.88	ST8SIA4		ST8SIA4	1124	0
1_MACS_peak_28367_lociStitched	chr8	133987735	134000168	1	12434	30760.5	3676.44	TG		SLA	1125	0
1_MACS_peak_21110_lociStitched	chr3	182510172	182514797	1	4626	29203.2	2149.7	ATP11B		ATP11B	1126	0
2_MACS_peak_16600_lociStitched	chr2	149873862	149896053	2	11412	30601.4	3559.44	LYPD6B,KIF5C		LYPD6B	1127	0
4_MACS_peak_14838_lociStitched	chr19	50311867	50328678	4	13059	28992.3	1961.84	FUZ,MED25	AP2A1,TSKS,PNKP,FUZ,PTOV1	MED25	1128	0
9_MACS_peak_19555_lociStitched	chr3	225283	291964	9	24684	35334.3	8341.79	CHL1		CHL1	1129	0
2_MACS_peak_22991_lociStitched	chr5	71576530	71605243	2	21103	31627.4	4651.51	MRPS27	PTCD2	MRPS27	1130	0
3_MACS_peak_25916_lociStitched	chr7	8214270	8231534	3	9680	29657.8	2686.28	ICA1		ICA1	1131	0
1_MACS_peak_27293_lociStitched	chr7	152032238	152041952	1	9715	30977	4009.94	MLL3		MLL3	1132	0
1_MACS_peak_5151_lociStitched	chr11	84427784	84435179	1	7396	29204.3	2257.69	DLG2		DLG2	1133	0
4_MACS_peak_28085_lociStitched	chr8	95940067	95973809	4	15337	31957	5010.69	TP53INP1	CCNE2	TP53INP1	1134	0
MACS_peak_9891	chr15	93442202	93452266	1	10065	29608.3	2665.95	CHD2,MIR3175	LOC100507217	MIR3175	1135	0
2_MACS_peak_13101_lociStitched	chr18	30339313	30355190	2	12359	31893.7	4974.26	KLHL14		KLHL14	1136	0
8_MACS_peak_27473_lociStitched	chr8	11380944	11417028	8	19021	28982.7	2103.7	BLK		BLK	1137	0
2_MACS_peak_13175_lociStitched	chr18	43263959	43270346	2	6336	28468.1	1612.72		SLC14A1	SLC14A1	1138	0
1_MACS_peak_27846_lociStitched	chr8	60963791	60972421	1	8631	28603.3	1774.33			CA8	1139	0
6_MACS_peak_158_lociStitched	chr1	8556320	8594468	6	18131	32299.9	5489.5	RERE		RERE	1140	0
5_MACS_peak_29410_lociStitched	chr9	123630350	123668545	5	16210	31556.7	4747.64	PHF19,TRAF1	PSMD5,LOC253039	PHF19	1141	0
1_MACS_peak_7584_lociStitched	chr13	74338211	74344184	1	5974	29032.4	2238.08	KLF12		KLF12	1142	0
3_MACS_peak_24294_lociStitched	chr6	14091419	14120675	3	12907	30803.6	4098.77	CD83		CD83	1143	0
MACS_peak_9890	chr15	93423006	93430453	1	7448	28265.8	1581.74	LOC100507217	MIR3175,CHD2	LOC100507217	1144	0
5_MACS_peak_12157_lociStitched	chr17	44702302	44735300	5	20870	36575	9892.8	NSFP1,NSF		NSFP1	1145	0
2_MACS_peak_27548_lociStitched	chr8	23304458	23316500	2	12014	28231.3	1551.01	ENTPD4	LOXL2	ENTPD4	1146	0
3_MACS_peak_2176_lociStitched	chr1	174838886	174847466	3	7934	28695	2038.61	RABGAP1L		RABGAP1L	1147	0
1_MACS_peak_13342_lociStitched	chr18	60188907	60199160	1	10254	29378.9	2731.4	ZCCHC2		ZCCHC2	1148	0
1_MACS_peak_5148_lociStitched	chr11	83433000	83442009	1	9010	28948.6	2308.11	DLG2	DLG2	DLG2	1149	0
MACS_peak_24411	chr6	26025639	26035575	1	9937	29385.7	2746.31	HIST1H3B,HIST1H4B,HIST1H2AB	HIST1H1A,HIST1H4A,HIST1H3C,HIST1H1C,HIST1H3A,HIST1H2BB	HIST1H3B	1150	0
5_MACS_peak_12147_lociStitched	chr17	44484722	44517726	5	20873	36482.6	9878.1	NSFP1	ARL17B,ARL17A	ARL17A	1151	0
3_MACS_peak_24236_lociStitched	chr6	10527999	10541070	3	11499	28850.3	2262.59	GCNT2	GCNT2	GCNT2	1152	0
1_MACS_peak_2196_lociStitched	chr1	178510629	178515926	1	5298	27453.3	878.243	C1orf220	C1orf49	C1orf220	1153	0
1_MACS_peak_12969_lociStitched	chr18	8909444	8913952	1	4509	28812	2240.93			NDUFV2	1154	0
9_MACS_peak_29499_lociStitched	chr9	125979374	126032352	9	24794	33365.5	6802.38	STRBP	STRBP	STRBP	1155	0
3_MACS_peak_27962_lociStitched	chr8	74079297	74105444	3	10115	29263.7	2716.67			LOC100130301	1156	0
4_MACS_peak_15470_lociStitched	chr2	39345267	39371333	4	14629	29942	3417.25	SOS1		SOS1	1157	0
6_MACS_peak_30041_lociStitched	chrX	19762903	19796300	6	19167	28845	2334.45	SH3KBP1		SH3KBP1	1158	0
5_MACS_peak_26258_lociStitched	chr7	47659301	47688858	5	15166	30963.9	4460.15		C7orf65	C7orf65	1159	0
3_MACS_peak_6467_lociStitched	chr12	70860999	70887221	3	14002	29489.3	3002.42			KCNMB4	1160	0
5_MACS_peak_9472_lociStitched	chr15	68114706	68156799	5	15899	31169.9	4701.79	SKOR1		SKOR1	1161	0
1_MACS_peak_20872_lociStitched	chr3	150477105	150485953	1	8849	29910.7	3443.64	SIAH2		SIAH2	1162	0
MACS_peak_18861	chr22	24092311	24098521	1	6211	27781.1	1314.04	ZNF70,VPREB3	C22orf15,LOC91316,MMP11,SMARCB1,CHCHD10	VPREB3	1163	0
2_MACS_peak_18562_lociStitched	chr21	45223805	45237954	2	8221	28122.6	1678.07	RRP1,LOC284837	AGPAT3,CSTB	LOC284837	1164	0
2_MACS_peak_12312_lociStitched	chr17	55320073	55339626	2	9034	29034.2	2614.24	MSI2		MSI2	1165	0
2_MACS_peak_16022_lociStitched	chr2	88125389	88137027	2	8792	28652.8	2233.33	RGPD1	RGPD2	RGPD2	1166	0
2_MACS_peak_9773_lociStitched	chr15	85868813	85875633	2	6786	27738.3	1347.63		AKAP13	AKAP13	1167	0
2_MACS_peak_24268_lociStitched	chr6	13258738	13275270	2	9691	28643.3	2266.54	PHACTR1		TBC1D7	1168	0
3_MACS_peak_22831_lociStitched	chr5	42991688	43021112	3	12294	30642.2	4287.08	LOC648987	LOC153684,C5orf39,LOC100132356	LOC648987	1169	0
1_MACS_peak_21015_lociStitched	chr3	173533044	173539279	1	6236	28909.2	2576.3	NLGN1		NLGN1	1170	0
2_MACS_peak_25312_lociStitched	chr6	119202110	119218125	2	8138	28735.7	2421.47	MCM9,ASF1A	MCM9	ASF1A	1171	0
4_MACS_peak_28662_lociStitched	chr9	9606114	9632307	4	13965	29836.4	3538.67	PTPRD		PTPRD	1172	0
5_MACS_peak_10868_lociStitched	chr16	68103795	68126033	5	15275	29549.9	3302.34	NFATC3,DUS2L	NFATC3,DDX28	NFATC3	1173	0
5_MACS_peak_6732_lociStitched	chr12	110430892	110451159	5	16679	28236	2020.62	GIT2,ANKRD13A	GIT2	ANKRD13A	1174	0
3_MACS_peak_19765_lociStitched	chr3	16865435	16892072	3	10605	30019.9	3809.09		PLCL2	PLCL2	1175	0
1_MACS_peak_6420_lociStitched	chr12	68380946	68388252	1	7307	27507.1	1299.01			IFNG	1176	0
3_MACS_peak_19716_lociStitched	chr3	14919072	14933468	3	12444	27578.4	1428.08	FGD5		NR2C2	1177	0
1_MACS_peak_1626_lociStitched	chr1	144997020	145002930	1	5911	29619.1	3480.4	PDE4DIP	PDE4DIP	PDE4DIP	1178	0
5_MACS_peak_25910_lociStitched	chr7	8152724	8174546	5	14519	28656.7	2544.45	ICA1		ICA1	1179	0
5_MACS_peak_9507_lociStitched	chr15	69954094	69991825	5	19349	29920.7	3822.15			LOC145837	1180	0
1_MACS_peak_12712_lociStitched	chr17	75200450	75210066	1	9617	27749.9	1713.57	SEC14L1		SEC14L1	1181	0
1_MACS_peak_12505_lociStitched	chr17	64533180	64540812	1	7633	27875.1	1853.81	PRKCA		PRKCA	1182	0
2_MACS_peak_1477_lociStitched	chr1	110879617	110895125	2	15019	28961.2	2940.32	RBM15,LOC440600	SLC16A4	RBM15	1183	0
3_MACS_peak_5011_lociStitched	chr11	72429856	72456104	3	13834	29718	3748.21	ARAP1	PDE2A,STARD10,ARAP1	ARAP1	1184	0
5_MACS_peak_27932_lociStitched	chr8	67563431	67593999	5	16412	30671.9	4707.47	C8orf44,VCPIP1	MYBL1,SGK3	VCPIP1	1185	0
3_MACS_peak_9723_lociStitched	chr15	80350589	80366091	3	12510	28601.2	2636.89	ZFAND6		ZFAND6	1186	0
5_MACS_peak_11003_lociStitched	chr16	81763620	81787172	5	12472	28457.9	2496.51		PLCG2	PLCG2	1187	0
1_MACS_peak_3058_lociStitched	chr10	6387536	6394414	1	6879	27320.1	1381.1			PFKFB3	1188	0
4_MACS_peak_29163_lociStitched	chr9	98187879	98228436	4	13323	30227.1	4347.71	PTCH1	PTCH1	PTCH1	1189	0
6_MACS_peak_6000_lociStitched	chr12	32258798	32294570	6	13618	30184.4	4317.68	BICD1		BICD1	1190	0
6_MACS_peak_17897_lociStitched	chr20	42337080	42382316	6	20068	29941.7	4075.76	GTSF1L,MYBL2	GTSF1L	GTSF1L	1191	0
1_MACS_peak_15650_lociStitched	chr2	55587203	55593535	1	6333	27487.8	1640.62	CCDC88A		CCDC88A	1192	0
1_MACS_peak_24599_lociStitched	chr6	32781624	32790542	1	8919	27658.3	1838.89	HLA-DOB,TAP2	PSMB8,PSMB9,TAP2,TAP1,LOC100507463	HLA-DOB	1193	0
2_MACS_peak_30751_lociStitched	chrX	143284106	143296025	2	9067	28088.3	2300.37			UBE2NL	1194	0
2_MACS_peak_29470_lociStitched	chr9	125659477	125668496	2	8888	27561.2	1785.76	RC3H2	SNORD90,ZBTB6,RABGAP1,ZBTB26	RC3H2	1195	0
3_MACS_peak_23883_lociStitched	chr5	159844959	159867102	3	14777	29348.3	3584.95	PTTG1,SLU7	MIR3142,C5orf54,MIR146A,C1QTNF2	PTTG1	1196	0
4_MACS_peak_7588_lociStitched	chr13	74540126	74571198	4	20081	34775.8	9128.95	KLF12		KLF12	1197	0
1_MACS_peak_7451_lociStitched	chr13	49970907	49977198	1	6292	27941.5	2327.67	CAB39L	SETDB2	CAB39L	1198	0
4_MACS_peak_18695_lociStitched	chr22	19861699	19885074	4	10778	27304.3	1715.72	TXNRD2	COMT,GNB1L,C22orf29	GNB1L	1199	0
5_MACS_peak_30633_lociStitched	chrX	120467016	120483138	5	13251	26707.7	1131.76			GLUD2	1200	0
3_MACS_peak_2570_lociStitched	chr1	209259340	209287892	3	15143	28740.4	3169.27			LOC642587	1201	0
2_MACS_peak_22160_lociStitched	chr4	113199446	113211941	2	11127	28336.2	2808.88	TIFA	AP1AR,ALPK1	TIFA	1202	0
1_MACS_peak_13029_lociStitched	chr18	13722967	13728411	1	5445	28358.9	2832.51	C18orf19,RNMT	C18orf19	C18orf19	1203	0
7_MACS_peak_10163_lociStitched	chr16	9029468	9058798	7	23852	29582.2	4079.8	USP7		USP7	1204	0
4_MACS_peak_16937_lociStitched	chr2	198104991	198127627	4	9859	28598.3	3101.13	ANKRD44		ANKRD44	1205	0
1_MACS_peak_15559_lociStitched	chr2	47203860	47215389	1	11530	27247.6	1772.01	TTC7A	MCFD2	MCFD2	1206	0
3_MACS_peak_10354_lociStitched	chr16	17488931	17512497	3	10559	27989.3	2526.28	XYLT1		XYLT1	1207	0
10_MACS_peak_10577_lociStitched	chr16	30336250	30363608	10	17354	27965.3	2530.61	LOC595101,CD2BP2	ZNF48,TBC1D10B,SEPT1,MYLPF	LOC595101	1208	0
3_MACS_peak_19681_lociStitched	chr3	13442756	13470434	3	10889	28475.1	3061.19	NUP210		NUP210	1209	0
5_MACS_peak_19769_lociStitched	chr3	16925097	16955219	5	13937	29625	4262.26	PLCL2	PLCL2,MIR3714	PLCL2	1210	0
4_MACS_peak_23272_lociStitched	chr5	112240213	112267888	4	13272	28458.2	3105.14	REEP5	SRP19,DCP2	REEP5	1211	0
1_MACS_peak_25962_lociStitched	chr7	20343540	20351494	1	7955	28010	2657.43		ITGB8	ITGB8	1212	0
5_MACS_peak_28010_lociStitched	chr8	81274276	81304221	5	14051	29537.7	4195.29			ZBTB10	1213	0
1_MACS_peak_26256_lociStitched	chr7	47638728	47643193	1	4466	26462.3	1152.42			C7orf65	1214	0
5_MACS_peak_17184_lociStitched	chr2	225424885	225461438	5	20156	31139.5	5830.2	CUL3		CUL3	1215	0
1_MACS_peak_27294_lociStitched	chr7	152127145	152135107	1	7963	27894.1	2585.26	MLL3,FABP5P3	LOC100128822	MLL3	1216	0
3_MACS_peak_12649_lociStitched	chr17	73658963	73688061	3	12984	28431.7	3130.94	SAP30BP,RECQL5	LOC643008,LOC100130933,ITGB4	SAP30BP	1217	0
6_MACS_peak_13497_lociStitched	chr19	1066290	1102327	6	15845	28555.7	3275.76	HMHA1,POLR2E	SBNO2,ABCA7,GPX4,CNN2,C19orf6	POLR2E	1218	0
4_MACS_peak_10429_lociStitched	chr16	23508215	23533478	4	13191	28337.5	3097.24	GGA2,EARS2	COG7,EARS2,UBFD1	GGA2	1219	0
5_MACS_peak_3687_lociStitched	chr10	84147703	84173756	5	18089	28871.9	3696.92	NRG3		NRG3	1220	0
4_MACS_peak_5409_lociStitched	chr11	118683228	118705916	4	10840	27572.7	2400.39		CXCR5,DDX6	DDX6	1221	0
2_MACS_peak_12956_lociStitched	chr18	5286919	5297555	2	9313	28987.4	3818.32	ZFP161	C18orf18,LOC339290	ZFP161	1222	0
1_MACS_peak_18093_lociStitched	chr20	51615109	51621366	1	6258	26550.3	1409.7	TSHZ2		TSHZ2	1223	0
4_MACS_peak_9151_lociStitched	chr15	45861742	45899813	4	15407	29249.9	4111.67	PLDN	SLC30A4,SQRDL	PLDN	1224	0
2_MACS_peak_12441_lociStitched	chr17	61771600	61784407	2	11024	26979.2	1876.23	STRADA,MAP3K3,LIMD2	STRADA	LIMD2	1225	0
MACS_peak_8647	chr14	96173268	96181202	1	7935	26588.4	1486.04	TCL1A	TCL1B	TCL1A	1226	0
2_MACS_peak_17941_lociStitched	chr20	43672242	43683163	2	7862	27389.9	2293.41	STK4	KCNS1	KCNS1	1227	0
3_MACS_peak_12989_lociStitched	chr18	9912842	9928423	3	15314	31383.3	6286.93	VAPA	TXNDC2,VAPA	VAPA	1228	0
MACS_peak_8619	chr14	95948905	95957792	1	8888	26590.8	1519.68		GLRX5,C14orf49,SCARNA13,SNHG10	C14orf49	1229	0
1_MACS_peak_22305_lociStitched	chr4	141070669	141080368	1	9700	27273.6	2223.98	MAML3		MAML3	1230	0
2_MACS_peak_28658_lociStitched	chr9	7972196	7983562	2	7423	26787.4	1740.13			C9orf123	1231	0
4_MACS_peak_29571_lociStitched	chr9	130660654	130680321	4	13494	27093.3	2049.3	ST6GALNAC4,ST6GALNAC6	FAM102A,PIP5KL1,AK1,ENG,DPM2	ST6GALNAC6	1232	0
3_MACS_peak_29354_lociStitched	chr9	116273967	116289963	3	13046	27287.6	2279.43	RGS3	RGS3	RGS3	1233	0
1_MACS_peak_1335_lociStitched	chr1	93001086	93004973	1	3888	26075.6	1112.46	EVI5	GFI1	GFI1	1234	0
5_MACS_peak_24398_lociStitched	chr6	25386626	25414512	5	14754	29174.3	4219.15	LRRC16A		LRRC16A	1235	0
MACS_peak_28834	chr9	35644113	35652470	1	8358	26814.3	1860.27	SIT1	TESK1,CCDC107,TPM2,CD72,CA9,C9orf100,RMRP	SIT1	1236	0
2_MACS_peak_20944_lociStitched	chr3	157814662	157829555	2	8852	29404.7	4455.99	RSRC1,SHOX2	SHOX2	SHOX2	1237	0
1_MACS_peak_16658_lociStitched	chr2	161990924	161998010	1	7087	26649.7	1730.4	TANK	TANK	TANK	1238	0
4_MACS_peak_23045_lociStitched	chr5	77778787	77809588	4	16255	29254.8	4370.66	LHFPL2		SCAMP1	1239	0
3_MACS_peak_19391_lociStitched	chr22	46066153	46092918	3	14320	29024	4156.6	ATXN10	ATXN10	ATXN10	1240	0
1_MACS_peak_10290_lociStitched	chr16	13482107	13487331	1	5225	25945.5	1086.07			SHISA9	1241	0
3_MACS_peak_23430_lociStitched	chr5	126919222	126945743	3	12900	29141.3	4304.36		CTXN3	CTXN3	1242	0
3_MACS_peak_4020_lociStitched	chr10	116248751	116261334	3	11225	27081.1	2251.1	ABLIM1		ABLIM1	1243	0
5_MACS_peak_23594_lociStitched	chr5	138922489	138957271	5	13607	28107.3	3314.72	UBE2D2		UBE2D2	1244	0
2_MACS_peak_29416_lociStitched	chr9	123690074	123707574	2	11472	27238.8	2525.25	TRAF1	TRAF1	TRAF1	1245	0
1_MACS_peak_17560_lociStitched	chr20	7997421	8004123	1	6703	26239	1534.09	TMX4		TMX4	1246	0
3_MACS_peak_24337_lociStitched	chr6	18324151	18338520	3	9774	26860	2191.27		RNF144B	RNF144B	1247	0
3_MACS_peak_8243_lociStitched	chr14	64966204	64977965	3	10989	27125.6	2459.23	ZBTB1,ZBTB25	AKAP5,HSPA2,C14orf50	ZBTB1	1248	0
1_MACS_peak_12843_lociStitched	chr17	79478419	79487403	1	8985	26262.9	1600.05	ACTG1	FSCN2,C17orf70	ACTG1	1249	0
4_MACS_peak_278_lociStitched	chr1	11967549	11991863	4	11934	27513.7	2871.48	KIAA2013	NPPB,PLOD1,MFN2	KIAA2013	1250	0
3_MACS_peak_3709_lociStitched	chr10	88148951	88174462	3	12803	27388.6	2775.6		GRID1	GRID1	1251	0
3_MACS_peak_29608_lociStitched	chr9	131445097	131466960	3	10654	26799.7	2205.98	SET,PKN3	ZDHHC12,WDR34	SET	1252	0
6_MACS_peak_8959_lociStitched	chr15	37367647	37403705	6	15109	29221.4	4629.85	MEIS2		MEIS2	1253	0
3_MACS_peak_10472_lociStitched	chr16	27241630	27255155	3	9691	26450.8	1907.03	NSMCE1	FLJ21408,JMJD5	FLJ21408	1254	0
MACS_peak_24461	chr6	27774416	27784826	1	10411	27164.9	2646.22	HIST1H2BM,HIST1H2BL,HIST1H3H,HIST1H2AJ,HIST1H2AI	HIST1H2AL,HIST1H2BN,HIST1H4K,HIST1H4J,HIST1H2AK	HIST1H3H	1255	0
4_MACS_peak_22708_lociStitched	chr5	6707552	6731330	4	14740	28022.4	3509.63	PAPD7	PAPD7	PAPD7	1256	0
6_MACS_peak_22698_lociStitched	chr5	6175328	6198249	6	13006	26691.5	2209.58			FLJ33360	1257	0
3_MACS_peak_4185_lociStitched	chr11	256427	271542	3	7174	26274.4	1902.98		ATHL1,IFITM3,IFITM1,IFITM5,RIC8A,PSMD13,NLRP6,IFITM2,SIRT3,BET1L	NLRP6	1258	0
3_MACS_peak_15672_lociStitched	chr2	60757400	60785237	3	12296	28975.5	4648.78	BCL11A		BCL11A	1259	0
6_MACS_peak_26465_lociStitched	chr7	69469921	69508348	6	21392	33200.9	8915.06	AUTS2		AUTS2	1260	0
3_MACS_peak_26049_lociStitched	chr7	26367858	26378098	3	8841	26379.3	2101.25	SNX10		SNX10	1261	0
1_MACS_peak_22813_lociStitched	chr5	39071599	39079557	1	7959	26011.5	1757.13	RICTOR		RICTOR	1262	0
2_MACS_peak_21021_lociStitched	chr3	176821906	176832483	2	10570	28762	4511.09	TBL1XR1		TBL1XR1	1263	0
5_MACS_peak_640_lociStitched	chr1	28194819	28219540	5	16537	26973.1	2731.67	RPA2,C1orf38	PPP1R8,SCARNA1,SMPDL3B	C1orf38	1264	0
1_MACS_peak_17854_lociStitched	chr20	39370037	39375886	1	5850	25320.9	1094.35			MAFB	1265	0
1_MACS_peak_6632_lociStitched	chr12	99781204	99790817	1	9614	25754.2	1565.96	ANKS1B		ANKS1B	1266	0
5_MACS_peak_1820_lociStitched	chr1	155033908	155059400	5	14837	26899.2	2727.64	EFNA4,ADAM15,EFNA3	ADAM15,EFNA4,DCST2,DCST1,EFNA1,SLC50A1	EFNA3	1267	0
4_MACS_peak_23359_lociStitched	chr5	123918896	123940589	4	9882	27244.2	3089.08			ZNF608	1268	0
1_MACS_peak_5613_lociStitched	chr12	1311706	1317693	1	5988	26347.6	2193.64	ERC1		ERC1	1269	0
3_MACS_peak_26252_lociStitched	chr7	47574476	47592818	3	11933	26469.3	2386.29	TNS3		TNS3	1270	0
2_MACS_peak_12235_lociStitched	chr17	47286650	47297634	2	10777	25647.6	1572.91	GNGT2,ABI3	PHOSPHO1,FLJ40194,ABI3	GNGT2	1271	0
2_MACS_peak_20375_lociStitched	chr3	69127829	69142316	2	9668	26450.4	2380.21	ARL6IP5,UBA3	TMF1,UBA3,MIR3136,LMOD3	ARL6IP5	1272	0
17_MACS_peak_11382_lociStitched	chr17	4237967	4285915	17	23526	28965.4	4900.29	UBE2G1		UBE2G1	1273	0
6_MACS_peak_11207_lociStitched	chr16	89591358	89641890	6	18026	27519.7	3466.5	RPL13,SNORD68,SPG7	DPEP1,ANKRD11,CPNE7	RPL13	1274	0
5_MACS_peak_22309_lociStitched	chr4	141154565	141174792	5	14134	27221.5	3197.89		SCOC	SCOC	1275	0
4_MACS_peak_19796_lociStitched	chr3	20079558	20098169	4	12547	26896.6	2905.18	KAT2B	C3orf48	KAT2B	1276	0
3_MACS_peak_3559_lociStitched	chr10	73838255	73850331	3	10020	25875.2	1891.1	SPOCK2		SPOCK2	1277	0
6_MACS_peak_30649_lociStitched	chrX	123092503	123117935	6	12971	25866.9	1887.05	STAG2	STAG2	STAG2	1278	0
4_MACS_peak_27774_lociStitched	chr8	54923420	54936158	4	12266	26290	2313.22	TCEA1		TCEA1	1279	0
2_MACS_peak_27619_lociStitched	chr8	29938518	29954912	2	12329	25192.7	1232.83	LEPROTL1,TMEM66	MBOAT4	TMEM66	1280	0
2_MACS_peak_21140_lociStitched	chr3	183414736	183421809	2	6473	25882.2	1923.15	YEATS2		YEATS2	1281	0
1_MACS_peak_5331_lociStitched	chr11	115061601	115066724	1	5124	25067.4	1110.15	CADM1		CADM1	1282	0
1_MACS_peak_4837_lociStitched	chr11	64897014	64904044	1	7031	25398	1447.48	SYVN1	C11orf2,SYVN1,MRPL49,CAPN1,FAU,SPDYC,TM7SF2,ZNHIT2,ZFPL1,CDCA5	SYVN1	1283	0
3_MACS_peak_7452_lociStitched	chr13	50012181	50030127	3	10691	27871.9	3931.97	SETDB2,CAB39L	PHF11,CAB39L	SETDB2	1284	0
5_MACS_peak_10746_lociStitched	chr16	56944529	56973913	5	11714	26765.9	2847.31	SLC12A3,HERPUD1	SLC12A3,NLRC5,CETP,HERPUD1	HERPUD1	1285	0
2_MACS_peak_1958_lociStitched	chr1	159878866	159896287	2	9730	25842.3	1926.76	TAGLN2	SLAMF9,CCDC19,IGSF9,VSIG8	TAGLN2	1286	0
1_MACS_peak_22271_lociStitched	chr4	133184439	133191749	1	7311	25544.1	1641.83			PCDH10	1287	0
1_MACS_peak_26475_lociStitched	chr7	69919549	69925461	1	5913	25812.4	1930.86	AUTS2		WBSCR17	1288	0
3_MACS_peak_20779_lociStitched	chr3	135157957	135182225	3	13099	28531.9	4683.72			PPP2R3A	1289	0
9_MACS_peak_17550_lociStitched	chr20	5740390	5785971	9	17309	27959.4	4156.99	C20orf196		C20orf196	1290	0
1_MACS_peak_25697_lociStitched	chr6	167366110	167374162	1	8053	25438.7	1659.52	RNASET2	MIR3939,FGFR1OP	RNASET2	1291	0
6_MACS_peak_10187_lociStitched	chr16	10960993	10991450	6	18419	27980.8	4215.25	CIITA	CLEC16A,FAM18A,DEXI	CIITA	1292	0
2_MACS_peak_27426_lociStitched	chr8	8599303	8613358	2	13831	24871.7	1115.97		CLDN23	CLDN23	1293	0
1_MACS_peak_29072_lociStitched	chr9	91534856	91544266	1	9411	25505.8	1753.08			C9orf47	1294	0
4_MACS_peak_22758_lociStitched	chr5	31991989	32020885	4	14414	26928.2	3184.34	PDZD2		MIR4279	1295	0
5_MACS_peak_12801_lociStitched	chr17	78634026	78653812	5	9774	25753.5	2018.17	RPTOR		RPTOR	1296	0
4_MACS_peak_13207_lociStitched	chr18	46571605	46591897	4	13384	27231.9	3498.34	DYM		SMAD7	1297	0
1_MACS_peak_20955_lociStitched	chr3	160084951	160090402	1	5452	26110.8	2464.4	IFT80	MIR16-2,SMC4,MIR15B	IFT80	1298	0
3_MACS_peak_532_lociStitched	chr1	25755937	25779181	3	12071	27646.4	4002.62	TMEM57	RHCE	TMEM57	1299	0
1_MACS_peak_13333_lociStitched	chr18	57619990	57630046	1	10057	26258.2	2641.71			PMAIP1	1300	0
3_MACS_peak_23168_lociStitched	chr5	96140509	96154698	3	10790	26102.1	2487.33	ERAP1		ERAP1	1301	0
4_MACS_peak_1983_lociStitched	chr1	160508293	160524415	4	13198	25390.5	1781.48	CD84	SLAMF6,CD84	SLAMF6	1302	0
2_MACS_peak_28463_lociStitched	chr8	144512846	144520792	2	6953	25212.7	1627.34	ZC3H3	MAFA	MAFA	1303	0
1_MACS_peak_16792_lociStitched	chr2	178125739	178131963	1	6225	25078.4	1503.1	NFE2L2	HNRNPA3,MIR3128,NFE2L2	NFE2L2	1304	0
2_MACS_peak_16956_lociStitched	chr2	200167134	200178352	2	9724	26072.9	2513.95	SATB2		SATB2	1305	0
10_MACS_peak_23216_lociStitched	chr5	106763619	106813551	10	21928	30323.7	6770.78	EFNA5		EFNA5	1306	0
2_MACS_peak_21186_lociStitched	chr3	186489017	186503954	2	6722	26631.2	3103.91	EIF4A2,SNORD2	RFC4,SNORA4,SNORA63,MIR1248,SNORA81	EIF4A2	1307	0
4_MACS_peak_1933_lociStitched	chr1	157693863	157718043	4	8829	26160.3	2633.2	FCRL2	FCRL3	FCRL3	1308	0
4_MACS_peak_7390_lociStitched	chr13	44832487	44855731	4	10340	27388.4	3886.4			SERP2	1309	0
4_MACS_peak_3018_lociStitched	chr10	5847072	5861388	4	13381	25575.5	2093	GDI2		GDI2	1310	0
2_MACS_peak_6418_lociStitched	chr12	68022247	68045840	2	11382	26874.8	3439.86	DYRK2	DYRK2	DYRK2	1311	0
1_MACS_peak_30127_lociStitched	chrX	33348481	33359108	1	10628	24869.3	1439.96	DMD		DMD	1312	0
3_MACS_peak_23299_lociStitched	chr5	118405723	118420159	3	9388	25732.2	2318.42	DMXL1		DMXL1	1313	0
3_MACS_peak_3175_lociStitched	chr10	18637813	18654565	3	7384	25379.3	1975.06	CACNB2	CACNB2	CACNB2	1314	0
4_MACS_peak_22906_lociStitched	chr5	56467579	56483860	4	12334	26119.6	2735.21	GPBP1	GPBP1	GPBP1	1315	0
1_MACS_peak_16853_lociStitched	chr2	185460677	185467425	1	6749	25177.5	1795.64	ZNF804A		ZNF804A	1316	0
2_MACS_peak_8892_lociStitched	chr15	31210197	31221836	2	8786	24987.8	1613.17	FAN1	FAN1	FAN1	1317	0
3_MACS_peak_20737_lociStitched	chr3	129293177	129313069	3	10084	26715	3375.67	PLXND1	H1FOO,RHO	PLXND1	1318	0
3_MACS_peak_26841_lociStitched	chr7	102769727	102791224	3	9048	28055.7	4718.59	RPL19P12,NAPEPLD	NAPEPLD	RPL19P12	1319	0
2_MACS_peak_27519_lociStitched	chr8	22395079	22410437	2	11388	24979.8	1646.38	PPP3CC,SORBS3	PDLIM2,SORBS3,C8orf58	SORBS3	1320	0
2_MACS_peak_5406_lociStitched	chr11	118655745	118664849	2	7810	25351	2028.37	DDX6		DDX6	1321	0
1_MACS_peak_13382_lociStitched	chr18	71727204	71734957	1	7754	25025.9	1704.11			FBXO15	1322	0
2_MACS_peak_4537_lociStitched	chr11	46135443	46144547	2	9050	25722.4	2402.55	PHF21A	PHF21A	PHF21A	1323	0
4_MACS_peak_16060_lociStitched	chr2	89428353	89460706	4	11014	30347.1	7043.25			ANKRD36BP2	1324	0
3_MACS_peak_30177_lociStitched	chrX	39954955	39969677	3	13811	24797.7	1519.31	BCOR		BCOR	1325	0
2_MACS_peak_16294_lociStitched	chr2	112098215	112106435	2	7807	25766.4	2526.01			LOC541471	1326	0
2_MACS_peak_26047_lociStitched	chr7	26330496	26345651	2	5964	25786.2	2555.13	SNX10		SNX10	1327	0
2_MACS_peak_4236_lociStitched	chr11	1865487	1876518	2	7812	24328.9	1106.41	LSP1	LSP1,MIR4298,SYT8,TNNI2	LSP1	1328	0
1_MACS_peak_24526_lociStitched	chr6	30578951	30586785	1	7835	24870.6	1649.06	PPP1R10,MRPS18B	ABCF1,ATAT1,MIR877,C6orf136	PPP1R10	1329	0
1_MACS_peak_27680_lociStitched	chr8	38236820	38245000	1	8181	25845.5	2629.05	LETM2,WHSC1L1		WHSC1L1	1330	0
MACS_peak_14559	chr19	42378221	42384356	1	6136	24076.2	863.808	CD79A	ARHGEF1,RPS19,LYPD4,DMRTC2	CD79A	1331	0
2_MACS_peak_5176_lociStitched	chr11	88573576	88585677	2	8870	26212	3038.56	GRM5		GRM5	1332	0
2_MACS_peak_20966_lociStitched	chr3	167449757	167469245	2	10754	30303.8	7148.2	PDCD10,SERPINI1		SERPINI1	1333	0
4_MACS_peak_25764_lociStitched	chr7	1958851	1981435	4	12983	25635.1	2497.79	MAD1L1		ELFN1	1334	0
4_MACS_peak_28153_lociStitched	chr8	102062180	102071523	4	8342	24437.6	1325.77	FLJ42969		FLJ42969	1335	0
2_MACS_peak_12125_lociStitched	chr17	43527688	43540982	2	7258	25749.1	2637.53	PLEKHM1	ARHGAP27,SH3D20,MIR4315-1	MIR4315-1	1336	0
MACS_peak_25737	chr7	1046197	1056423	1	10227	24448.3	1364.15	C7orf50	GPR146,CYP2W1,MIR339,COX19	MIR339	1337	0
4_MACS_peak_16661_lociStitched	chr2	162087965	162108156	4	18955	26157.4	3075.09	TANK		PSMD14	1338	0
5_MACS_peak_23978_lociStitched	chr5	176411944	176434752	5	12213	25807.3	2764.33	UIMC1	ZNF346	UIMC1	1339	0
MACS_peak_4948	chr11	67224636	67230008	1	5373	24078.4	1043.78	CABP4	AIP,TMEM134,CDK2AP2,PTPRCAP,CORO1B,GPR152,PITPNM1,CARNS1,RPS6KB2	CABP4	1340	0
2_MACS_peak_16013_lociStitched	chr2	87901490	87909649	2	7761	25540.1	2512.16			NCRNA00152	1341	0
5_MACS_peak_28157_lociStitched	chr8	102107110	102150639	5	14419	27558.2	4553.13		FLJ42969	FLJ42969	1342	0
2_MACS_peak_27647_lociStitched	chr8	37124519	37136104	2	6924	25576.2	2596.2			ZNF703	1343	0
3_MACS_peak_25562_lociStitched	chr6	156878036	156892378	3	10862	25970.5	3004.65			ARID1B	1344	0
6_MACS_peak_30200_lociStitched	chrX	41563216	41595448	6	15797	25215.1	2262.69	GPR82,CASK	GPR34	GPR82	1345	0
1_MACS_peak_18598_lociStitched	chr21	45659224	45671252	1	12029	24938.9	1987.03	DNMT3L,ICOSLG	AIRE,DNMT3L,PFKL	ICOSLG	1346	0
4_MACS_peak_14048_lociStitched	chr19	16546551	16561430	4	10167	24452.1	1511.71	EPS15L1	C19orf44,CALR3	EPS15L1	1347	0
2_MACS_peak_27686_lociStitched	chr8	38756756	38764612	2	7716	24696.1	1766.81	PLEKHA2		PLEKHA2	1348	0
1_MACS_peak_2705_lociStitched	chr1	226588505	226596765	1	8261	24773.4	1844.46	PARP1		PARP1	1349	0
1_MACS_peak_3403_lociStitched	chr10	60023304	60030907	1	7604	24861	1932.68	CISD1,IPMK		IPMK	1350	0
3_MACS_peak_10599_lociStitched	chr16	30461510	30485856	3	13414	25288.2	2366.43	ITGAL	SEPHS2,ZNF771,DCTPP1	ITGAL	1351	0
7_MACS_peak_13852_lociStitched	chr19	10974663	11008401	7	15500	25367.6	2459.5	C19orf38,CARM1	TMED1,MIR199A1,YIPF2,C19orf52	CARM1	1352	0
3_MACS_peak_8694_lociStitched	chr14	102237829	102259283	3	12344	26397	3490.57	PPP2R5C	NCRNA00239,PPP2R5C	PPP2R5C	1353	0
4_MACS_peak_16361_lociStitched	chr2	118804154	118819786	4	10518	25575.5	2674.64		INSIG2,CCDC93	INSIG2	1354	0
7_MACS_peak_11141_lociStitched	chr16	87960114	88000703	7	16607	26297.6	3409.48	BANP,CA5A	BANP	BANP	1355	0
1_MACS_peak_13206_lociStitched	chr18	46547939	46553336	1	5398	24048	1185.72			SMAD7	1356	0
2_MACS_peak_16841_lociStitched	chr2	182319497	182331555	2	10437	25470.1	2620.2	ITGA4		ITGA4	1357	0
2_MACS_peak_20823_lociStitched	chr3	141739613	141749597	2	6964	26239.9	3414.53	TFDP2	TFDP2	TFDP2	1358	0
2_MACS_peak_29419_lociStitched	chr9	123832765	123844971	2	8254	24975.9	2154.36		CEP110,C5	CEP110	1359	0
2_MACS_peak_5034_lociStitched	chr11	73076692	73100173	2	14737	26136.7	3367.18	ARHGEF17,RELT		RELT	1360	0
8_MACS_peak_6442_lociStitched	chr12	69164747	69206527	8	13980	26597.1	3839.58	MDM2	SLC35E3	MDM2	1361	0
2_MACS_peak_22605_lociStitched	chr4	186315280	186327854	2	8046	24905.3	2157.7	UFSP2,ANKRD37	C4orf47,LRP2BP,UFSP2	ANKRD37	1362	0
4_MACS_peak_15923_lociStitched	chr2	74983368	75011574	4	9779	25526.4	2812.14		HK2	HK2	1363	0
5_MACS_peak_6461_lociStitched	chr12	70635114	70664141	5	14500	27659.8	4957.81	CNOT2		CNOT2	1364	0
2_MACS_peak_2886_lociStitched	chr1	246728755	246744154	2	12923	25302.1	2602.43	CNST,TFB2M		CNST	1365	0
2_MACS_peak_16586_lociStitched	chr2	146500010	146512352	2	8400	25112.3	2426.44			PABPC1P2	1366	0
7_MACS_peak_18133_lociStitched	chr20	52444764	52465452	7	14985	25609.7	2931.49		SUMO1P1	SUMO1P1	1367	0
3_MACS_peak_29064_lociStitched	chr9	88951826	88970233	3	9960	25537.9	2865.97	ZCCHC6	ZCCHC6	ZCCHC6	1368	0
4_MACS_peak_28055_lociStitched	chr8	87519347	87536896	4	14889	26041	3386.96	FAM82B,CPNE3		CPNE3	1369	0
3_MACS_peak_15555_lociStitched	chr2	47141340	47150734	3	9341	24507.1	1861.89	MCFD2	TTC7A,MCFD2	MCFD2	1370	0
3_MACS_peak_15704_lociStitched	chr2	61684605	61699742	3	10682	24753.5	2154	USP34	SNORA70B	USP34	1371	0
1_MACS_peak_22048_lociStitched	chr4	100736408	100745053	1	8646	24322.7	1728.14	DAPP1		DAPP1	1372	0
2_MACS_peak_22083_lociStitched	chr4	103414384	103427941	2	8253	25268.9	2715.47	NFKB1		NFKB1	1373	0
3_MACS_peak_27781_lociStitched	chr8	55051687	55079147	3	5478	26710.3	4157.44	MRPL15	LYPLA1	MRPL15	1374	0
4_MACS_peak_13328_lociStitched	chr18	57548805	57575383	4	11453	27226.5	4677.73	PMAIP1		PMAIP1	1375	0
4_MACS_peak_8218_lociStitched	chr14	64191091	64226943	4	11874	25928.2	3413.11	SGPP1		SGPP1	1376	0
2_MACS_peak_12475_lociStitched	chr17	62793088	62806386	2	6844	25174.4	2660.93	PLEKHM1P	LOC146880	LOC146880	1377	0
5_MACS_peak_16151_lociStitched	chr2	98626391	98656791	5	11571	25882.6	3371.36		VWA3B,TMEM131	TMEM131	1378	0
MACS_peak_24421	chr6	26193226	26201335	1	8110	23986.4	1476.65	HIST1H2BF,HIST1H3D,HIST1H2AD	HIST1H2BG,HIST1H4D,HIST1H3F,HIST1H4G,HIST1H3E,HIST1H2BE,HIST1H4E,HIST1H2AE,HIST1H2BD,HIST1H4F,HIST1H1D,HIST1H1E	HIST1H3D	1379	0
3_MACS_peak_15223_lociStitched	chr2	12295241	12319331	3	12645	25610.1	3153.38			MIR4262	1380	0
2_MACS_peak_8775_lociStitched	chr14	105478209	105488890	2	10674	24991.4	2554.9	CDCA4	AHNAK2,GPR132,C14orf79	CDCA4	1381	0
2_MACS_peak_15596_lociStitched	chr2	48123728	48135124	2	8371	24461.5	2050.14	FBXO11	FBXO11	FBXO11	1382	0
MACS_peak_12734	chr17	76120084	76130802	1	10719	23872.2	1489.8	TMC8,TMC6	C17orf99,SYNGR2	TMC6	1383	0
1_MACS_peak_30494_lociStitched	chrX	91847586	91854136	1	6551	23528.3	1147.56	PCDH11X		PCDH11X	1384	0
5_MACS_peak_15090_lociStitched	chr2	3242302	3283064	5	15489	26165.1	3786.79	TSSC1		TSSC1	1385	0
4_MACS_peak_1954_lociStitched	chr1	159024735	159048072	4	13786	25859.7	3481.88	AIM2,IFI16		AIM2	1386	0
1_MACS_peak_9569_lociStitched	chr15	72517505	72524945	1	7441	23608.6	1236.53	PKM2	GRAMD2,PKM2,PARP6	PKM2	1387	0
3_MACS_peak_23801_lociStitched	chr5	156907369	156931436	3	10996	24500.2	2137.15	ADAM19	NIPAL4	NIPAL4	1388	0
1_MACS_peak_19831_lociStitched	chr3	29320366	29329663	1	9298	24716.1	2400.49	RBMS3	RBMS3	RBMS3	1389	0
5_MACS_peak_2072_lociStitched	chr1	167396369	167426066	5	12632	25830.5	3528	POU2F1,CD247		CD247	1390	0
1_MACS_peak_16581_lociStitched	chr2	146165436	146172481	1	7046	24003	1733.77			DKFZp686O1327	1391	0
6_MACS_peak_8541_lociStitched	chr14	91694134	91718806	6	11953	24422.8	2215.55	GPR68		GPR68	1392	0
4_MACS_peak_21398_lociStitched	chr4	291330	310934	4	13884	23618.9	1417.37		ZNF732,ZNF141	ZNF732	1393	0
2_MACS_peak_26079_lociStitched	chr7	30059155	30070012	2	7702	25398.9	3222.36	PLEKHA8,FKBP14	SCRN1	FKBP14	1394	0
3_MACS_peak_14872_lociStitched	chr19	50917576	50937032	3	10844	24670.2	2511.77	SPIB,MYBPC2,POLD1	FAM71E1,NAPSA,NR1H2,C19orf63	SPIB	1395	0
3_MACS_peak_23775_lociStitched	chr5	154133235	154151808	3	14424	24616.7	2496.21	LARP1		LARP1	1396	0
1_MACS_peak_17334_lociStitched	chr2	237876652	237884941	1	8290	23469.5	1359.4			COPS8	1397	0
2_MACS_peak_15572_lociStitched	chr2	47728421	47749933	2	9295	24407.5	2301.78	KCNK12		KCNK12	1398	0
3_MACS_peak_6332_lociStitched	chr12	57020043	57031530	3	10813	23847	1744.88	BAZ2A	ATP5B,SNORD59A,SNORD59B	BAZ2A	1399	0
8_MACS_peak_2805_lociStitched	chr1	233732650	233778465	8	20962	27828	5726.88	KCNK1		KCNK1	1400	0
2_MACS_peak_29051_lociStitched	chr9	86592619	86602184	2	9245	23652.3	1565.79	HNRNPK,RMI1	MIR7-1,HNRNPK,C9orf64	RMI1	1401	0
1_MACS_peak_27154_lociStitched	chr7	135653956	135662938	1	8983	24632.2	2585.02	LUZP6	MTPN	LUZP6	1402	0
2_MACS_peak_15081_lociStitched	chr2	1609660	1622512	2	12821	23723.5	1690.04			PXDN	1403	0
7_MACS_peak_6925_lociStitched	chr12	121928161	121976826	7	14750	26410.5	4394.45	KDM2B		KDM2B	1404	0
3_MACS_peak_24195_lociStitched	chr6	6282086	6294089	3	8698	23937.6	1952.89	F13A1		F13A1	1405	0
3_MACS_peak_5848_lociStitched	chr12	12029194	12050093	3	12425	24907.4	2925.86	ETV6		BCL2L14	1406	0
4_MACS_peak_1901_lociStitched	chr1	156450474	156475761	4	17069	25168.2	3188.69	MEF2D		MEF2D	1407	0
2_MACS_peak_162_lociStitched	chr1	8934579	8944058	2	7506	23429.2	1462.61	ENO1		ENO1	1408	0
3_MACS_peak_27444_lociStitched	chr8	9575040	9587443	3	10530	23121.7	1175.8	TNKS	MIR597	MIR597	1409	0
6_MACS_peak_27017_lociStitched	chr7	128077148	128100087	6	14097	27503.9	5567.3	C7orf68	IMPDH1,METTL2B	C7orf68	1410	0
4_MACS_peak_23971_lociStitched	chr5	175956493	175971591	4	12198	23675.2	1757.41	CDHR2,RNF44	CDHR2	RNF44	1411	0
3_MACS_peak_16679_lociStitched	chr2	166428030	166453300	3	11455	25350.9	3451.88	CSRNP3		CSRNP3	1412	0
5_MACS_peak_6618_lociStitched	chr12	97665863	97702174	5	12780	25802.6	3921.59			RMST	1413	0
1_MACS_peak_7578_lociStitched	chr13	70519749	70526870	1	7122	24332.5	2461.02	KLHL1		ATXN8OS	1414	0
5_MACS_peak_19058_lociStitched	chr22	35787853	35808337	5	10929	23888.4	2023.82	HMOX1,MCM5		MCM5	1415	0
5_MACS_peak_29434_lociStitched	chr9	124494229	124511227	5	16472	24366.6	2512.3	DAB2IP		DAB2IP	1416	0
2_MACS_peak_6655_lociStitched	chr12	102089081	102102279	2	10513	24273.8	2421.83	CHPT1	SYCP3	CHPT1	1417	0
2_MACS_peak_28182_lociStitched	chr8	103539892	103550665	2	10666	23614.4	1778.62		ODF1	ODF1	1418	0
4_MACS_peak_10991_lociStitched	chr16	81464756	81487311	4	11663	24260.2	2424.66	CMIP	CMIP	CMIP	1419	0
5_MACS_peak_627_lociStitched	chr1	27935341	27961806	5	14691	24803	2979.96	FGR	IFI6,AHDC1	FGR	1420	0
2_MACS_peak_28295_lociStitched	chr8	125484387	125493918	2	8885	24772	2975.58	RNF139	TRMT12	RNF139	1421	0
1_MACS_peak_9521_lociStitched	chr15	70171185	70177845	1	6661	22703.9	915.084		C15orf50	C15orf50	1422	0
2_MACS_peak_11758_lociStitched	chr17	28241777	28259270	2	7012	25051.7	3274.69	EFCAB5,SSH2	EFCAB5	EFCAB5	1423	0
3_MACS_peak_16352_lociStitched	chr2	114612001	114626988	3	13768	23892.3	2120.66		ACTR3	ACTR3	1424	0
1_MACS_peak_11877_lociStitched	chr17	35501311	35506774	1	5464	22854.5	1088.23	ACACA		MIR2909	1425	0
6_MACS_peak_16709_lociStitched	chr2	171068635	171092727	6	19629	25417.1	3652.35	MYO3B	MYO3B	MYO3B	1426	0
5_MACS_peak_2562_lociStitched	chr1	208034755	208057649	5	14452	24446.2	2724.39		LOC148696,CD34	CD34	1427	0
5_MACS_peak_25599_lociStitched	chr6	158652137	158679646	5	13461	25113	3397.36			TULP4	1428	0
1_MACS_peak_21139_lociStitched	chr3	183352578	183356883	1	4306	23196.2	1497.28	KLHL24		KLHL24	1429	0
2_MACS_peak_26583_lociStitched	chr7	77324676	77331046	2	6326	23596.4	1900.17	RSBN1L		RSBN1L	1430	0
2_MACS_peak_319_lociStitched	chr1	15266328	15278125	2	11783	23109.1	1416.82	KAZ		KAZ	1431	0
1_MACS_peak_26112_lociStitched	chr7	32929009	32933564	1	4556	23091.1	1408.86	KBTBD2	RP9P	KBTBD2	1432	0
2_MACS_peak_5018_lociStitched	chr11	72523113	72534842	2	8327	24118.3	2445.5	ATG16L2	STARD10	ATG16L2	1433	0
3_MACS_peak_25634_lociStitched	chr6	159330553	159343804	3	5566	22974.6	1329.08	C6orf99		C6orf99	1434	0
1_MACS_peak_1982_lociStitched	chr1	160488868	160493776	1	4909	23038.2	1399.27	SLAMF6	SLAMF6	SLAMF6	1435	0
6_MACS_peak_15408_lociStitched	chr2	33281163	33312465	6	15477	25683.3	4047.35	LTBP1	LTBP1	LTBP1	1436	0
1_MACS_peak_3914_lociStitched	chr10	104402039	104413373	1	11335	22318.9	690.241	TRIM8		TRIM8	1437	0
3_MACS_peak_6226_lociStitched	chr12	53763901	53782741	3	8574	23778	2149.64	SP1	SP7,AAAS,AMHR2	SP1	1438	0
4_MACS_peak_15539_lociStitched	chr2	45949238	45967269	4	12838	23927.1	2304.36	PRKCE		PRKCE	1439	0
1_MACS_peak_9171_lociStitched	chr15	50641967	50649547	1	7581	23056.1	1440.2	LOC100129387,FLJ10038,GABPB1		LOC100129387	1440	0
6_MACS_peak_10412_lociStitched	chr16	22199888	22228353	6	13204	25168.8	3640.67	EEF2K		EEF2K	1441	0
1_MACS_peak_6079_lociStitched	chr12	46656173	46664939	1	8767	23115.9	1598.92	SLC38A1	SLC38A1	SLC38A1	1442	0
3_MACS_peak_19979_lociStitched	chr3	39294559	39305983	3	9906	23107.3	1591.36	CX3CR1		CX3CR1	1443	0
4_MACS_peak_5364_lociStitched	chr11	116932954	116970600	4	10075	26054.8	4566.46	SIK3	PAFAH1B2	SIK3	1444	0
2_MACS_peak_20924_lociStitched	chr3	156391192	156405715	2	14478	27380.2	5902.15	TIPARP,LOC100287227		TIPARP	1445	0
3_MACS_peak_27637_lociStitched	chr8	31682896	31698836	3	8938	22751.2	1300.7	NRG1		NRG1	1446	0
2_MACS_peak_21287_lociStitched	chr3	194405895	194414502	2	8538	24707.3	3265.5	FAM43A	LSG1	FAM43A	1447	0
1_MACS_peak_4445_lociStitched	chr11	30224956	30230828	1	5873	22630.7	1237.82		FSHB	FSHB	1448	0
1_MACS_peak_23403_lociStitched	chr5	124743644	124749755	1	6112	23089.2	1704.36			ZNF608	1449	0
2_MACS_peak_26675_lociStitched	chr7	94174146	94187901	2	10012	25173	3800.51	CASD1		CASD1	1450	0
2_MACS_peak_24063_lociStitched	chr5	180471138	180481980	2	10678	22736.8	1374.77	BTNL9		BTNL9	1451	0
3_MACS_peak_14504_lociStitched	chr19	40779834	40793268	3	11450	23209.9	1855.24	AKT2,MIR641	CNTD2	MIR641	1452	0
2_MACS_peak_17141_lociStitched	chr2	220111573	220120196	2	8382	22643.1	1308.97	STK16,TUBA4B,TUBA4A	ZFAND2B,GLB1L,ANKZF1,DNAJB2,ABCB6,ATG9A,MIR153-1	TUBA4B	1453	0
4_MACS_peak_20111_lociStitched	chr3	48262763	48285174	4	14702	23374.7	2057.33	ZNF589,CAMP	CDC25A	ZNF589	1454	0
1_MACS_peak_583_lociStitched	chr1	27111533	27116100	1	4568	22464.6	1207.97	PIGV	ZDHHC18	PIGV	1455	0
4_MACS_peak_14304_lociStitched	chr19	34661160	34692962	4	12696	25578.3	4328.25	LSM14A	LSM14A	LSM14A	1456	0
3_MACS_peak_8049_lociStitched	chr14	50990466	51011041	3	11092	23850.5	2656.23	MAP4K5,ATL1	MAP4K5,ATL1	ATL1	1457	0
1_MACS_peak_3015_lociStitched	chr10	5725932	5738009	1	12078	23157.6	1973.38	C10orf18	ASB13	C10orf18	1458	0
MACS_peak_28832	chr9	35633189	35637659	1	4471	22376.4	1199.3		TESK1,SIT1,C9orf100,CD72,CA9,CCDC107,RMRP	SIT1	1459	0
2_MACS_peak_7348_lociStitched	chr13	41627278	41637498	2	7395	23980.2	2819.7	WBP4	ELF1	WBP4	1460	0
2_MACS_peak_16195_lociStitched	chr2	100721024	100732884	2	11296	23283.6	2126.5	AFF3		AFF3	1461	0
3_MACS_peak_14206_lociStitched	chr19	19626198	19638664	3	10416	22315.4	1163.08	TSSK6,NDUFA13	CILP2,YJEFN3	NDUFA13	1462	0
1_MACS_peak_27060_lociStitched	chr7	129250210	129257860	1	7651	24584.8	3434.09	NRF1	NRF1	NRF1	1463	0
6_MACS_peak_22150_lociStitched	chr4	111086052	111125204	6	14275	25202.1	4075.72	ELOVL6		ELOVL6	1464	0
1_MACS_peak_1139_lociStitched	chr1	61541691	61550239	1	8549	22846.2	1750.63	NFIA	NFIA	NFIA	1465	0
2_MACS_peak_22001_lociStitched	chr4	87989518	87997789	2	7849	22674.1	1584.72	AFF1		AFF1	1466	0
6_MACS_peak_13592_lociStitched	chr19	2445883	2495797	6	14896	24787.3	3713.6	LMNB2,GADD45B	TIMM13	GADD45B	1467	0
1_MACS_peak_22022_lociStitched	chr4	90813491	90820904	1	7414	22746.8	1710.18	MMRN1		MMRN1	1468	0
2_MACS_peak_9345_lociStitched	chr15	64298831	64313070	2	9492	23297.9	2264	DAPK2		DAPK2	1469	0
3_MACS_peak_26995_lociStitched	chr7	127022008	127036933	3	10073	25732.2	4707.35	ZNF800		ZNF800	1470	0
MACS_peak_14970	chr19	55784714	55793414	1	8701	22699.2	1675.62	HSPBP1	TMEM86B,TMEM150B,BRSK1,PPP6R1,HSPBP1	HSPBP1	1471	0
5_MACS_peak_11585_lociStitched	chr17	17722628	17745211	5	14571	23653.4	2630.92	SREBF1	MIR33B,SMCR5	SREBF1	1472	0
2_MACS_peak_18637_lociStitched	chr22	17081153	17090751	2	9006	23163.8	2164.35	psiTPTE22	CCT8L2	psiTPTE22	1473	0
3_MACS_peak_16556_lociStitched	chr2	145081303	145097864	3	8169	23478.5	2487.46	GTDC1	GTDC1	GTDC1	1474	0
2_MACS_peak_7933_lociStitched	chr14	35014675	35026839	2	5518	23736.8	2770.96		EAPP	EAPP	1475	0
2_MACS_peak_23552_lociStitched	chr5	135366306	135379179	2	9336	23045.2	2081.56	TGFBI	VTRNA2	TGFBI	1476	0
MACS_peak_5772	chr12	8795924	8802302	1	6379	22284.1	1324.07	MFAP5	RIMKLB,AICDA	MFAP5	1477	0
1_MACS_peak_12656_lociStitched	chr17	73778712	73783653	1	4942	22296.8	1356.8	UNK	GALK1,H3F3B	UNK	1478	0
8_MACS_peak_13530_lociStitched	chr19	1590300	1623277	8	14756	23835.8	2908.57	MBD3,UQCR11,TCF3	MEX3D	UQCR11	1479	0
3_MACS_peak_20999_lociStitched	chr3	169862528	169876189	3	7258	24393.1	3478.09	PHC3		PHC3	1480	0
2_MACS_peak_6474_lociStitched	chr12	72078758	72090240	2	11424	23212	2306.73	TMEM19	THAP2,ZFC3H1	TMEM19	1481	0
1_MACS_peak_22345_lociStitched	chr4	146855033	146861288	1	6256	22139.6	1236.61	ZNF827		ZNF827	1482	0
3_MACS_peak_21749_lociStitched	chr4	48196893	48215703	3	15633	24234.8	3348.18	TEC		TEC	1483	0
2_MACS_peak_29195_lociStitched	chr9	100744222	100755715	2	11268	22782.6	1918.18	ANP32B	HEMGN	ANP32B	1484	0
1_MACS_peak_3600_lociStitched	chr10	74853692	74860408	1	6717	22211.2	1352.6	P4HA1	P4HA1,NUDT13	P4HA1	1485	0
3_MACS_peak_2998_lociStitched	chr10	1612240	1624766	3	11252	22732.2	1900.19	ADARB2	NCRNA00168	NCRNA00168	1486	0
3_MACS_peak_23911_lociStitched	chr5	171533510	171543254	3	8726	21950.3	1118.61	STK10		STK10	1487	0
3_MACS_peak_6509_lociStitched	chr12	80072121	80085782	3	12025	23569.3	2737.66	PAWR		PAWR	1488	0
3_MACS_peak_3700_lociStitched	chr10	85923025	85939782	3	10022	22090.8	1271.86	C10orf99	GHITM,LRIT2,CDHR1	C10orf99	1489	0
2_MACS_peak_6498_lociStitched	chr12	78137385	78143999	2	6147	22534.6	1717.66			NAV3	1490	0
6_MACS_peak_11680_lociStitched	chr17	25658896	25681850	6	14083	23335	2550.19		WSB1	WSB1	1491	0
3_MACS_peak_19483_lociStitched	chr22	50315481	50330806	3	11146	22458.8	1676.56	CRELD2	PIM3,CRELD2,ALG12	CRELD2	1492	0
3_MACS_peak_17009_lociStitched	chr2	203498444	203509892	3	10289	22701.4	1928.99	FAM117B		FAM117B	1493	0
4_MACS_peak_5226_lociStitched	chr11	102212096	102238825	4	10011	25980.6	5225.52	BIRC2	BIRC3	BIRC2	1494	0
2_MACS_peak_23892_lociStitched	chr5	163334119	163345916	2	9463	22857.9	2131.72			MAT2B	1495	0
4_MACS_peak_820_lociStitched	chr1	36717831	36728392	4	9112	22279.5	1555.64	THRAP3	C1orf113	THRAP3	1496	0
6_MACS_peak_19515_lociStitched	chr22	50730609	50754758	6	17960	22808.7	2108.21	FAM116B,PLXNB2	TUBGCP6,MAPK12,HDAC10,MAPK11,PPP6R2	PLXNB2	1497	0
4_MACS_peak_29440_lociStitched	chr9	124581608	124605270	4	12100	23255	2562.59	TTLL11		DAB2IP	1498	0
1_MACS_peak_25848_lociStitched	chr7	5568245	5573770	1	5526	21574	884	ACTB	MIR589,FBXL18	ACTB	1499	0
3_MACS_peak_2851_lociStitched	chr1	241693971	241718107	3	10292	24051.5	3364.56	KMO	FH	KMO	1500	0
6_MACS_peak_15692_lociStitched	chr2	61192015	61223789	6	14838	25352.5	4680.31	PUS10	PEX13	PEX13	1501	0
MACS_peak_24010	chr5	176933835	176939028	1	5194	21638.2	973.168	DOK3,DDX41	DOK3,DBN1,PDLIM7,FAM193B	DOK3	1502	0
3_MACS_peak_22689_lociStitched	chr5	1781766	1802873	3	11670	23557.5	2895.88	NDUFS6,MRPL36		MRPL36	1503	0
7_MACS_peak_8630_lociStitched	chr14	96031990	96047852	7	12494	22852.4	2193.71		GLRX5,SNHG10,SCARNA13	GLRX5	1504	0
3_MACS_peak_3010_lociStitched	chr10	3845236	3854366	3	8055	22243.4	1593.18		KLF6	KLF6	1505	0
3_MACS_peak_23461_lociStitched	chr5	130709082	130731036	3	12504	24167	3530.2	CDC42SE2		CDC42SE2	1506	0
4_MACS_peak_29862_lociStitched	chrX	315031	335682	4	10242	21735.2	1108.96	PPP2R3B	NCRNA00107	PPP2R3B	1507	0
2_MACS_peak_10564_lociStitched	chr16	30074334	30082354	2	7955	21877.8	1256.73	ALDOA	YPEL3,C16orf92,TBX6,PPP4C,LOC100271831,FAM57B,GDPD3	ALDOA	1508	0
1_MACS_peak_5604_lociStitched	chr12	858676	864967	1	6292	22696	2077.29	WNK1	WNK1	WNK1	1509	0
4_MACS_peak_10226_lociStitched	chr16	11861708	11887237	4	11703	23438.2	2820.95	ZC3H7A	TXNDC11,BCAR4	ZC3H7A	1510	0
3_MACS_peak_23919_lociStitched	chr5	171601365	171617023	3	11153	22165.5	1550.14	STK10	EFCAB9	STK10	1511	0
5_MACS_peak_5927_lociStitched	chr12	25148299	25180243	5	17495	25861.9	5264.37	C12orf77	LRMP,BCAT1	C12orf77	1512	0
3_MACS_peak_24532_lociStitched	chr6	30683487	30704196	3	9337	23169.2	2584.48	MDC1,FLOT1,TUBB	NRM,KIAA1949,IER3,DHX16	TUBB	1513	0
3_MACS_peak_20063_lociStitched	chr3	45591682	45610001	3	11685	22739.4	2156.15		LIMD1	LIMD1	1514	0
1_MACS_peak_26965_lociStitched	chr7	116268395	116275370	1	6976	23407.4	2826.97		MET	MET	1515	0
5_MACS_peak_19286_lociStitched	chr22	41463633	41495360	5	11473	22881.5	2309.73	EP300,MIR1281		MIR1281	1516	0
1_MACS_peak_20807_lociStitched	chr3	140659608	140664570	1	4963	22122.1	1551.12	SLC25A36		SLC25A36	1517	0
4_MACS_peak_17112_lociStitched	chr2	218764192	218784724	4	13047	22997.9	2445.36	TNS1		TNS1	1518	0
2_MACS_peak_9294_lociStitched	chr15	59661196	59671482	2	9769	22293.9	1813.42	MYO1E		MYO1E	1519	0
3_MACS_peak_4022_lociStitched	chr10	116283980	116305524	3	7344	23058.5	2600.36	ABLIM1		ABLIM1	1520	0
2_MACS_peak_4708_lociStitched	chr11	61121017	61130539	2	8972	22174.8	1742.53	CYBASC3,TMEM138	TMEM138,TMEM216,DDB1,CYBASC3,DAK	CYBASC3	1521	0
MACS_peak_8615	chr14	95927524	95935809	1	8286	21206.3	781.275	C14orf49		C14orf49	1522	0
3_MACS_peak_20388_lociStitched	chr3	71350821	71369153	3	13569	23378.8	2967.95	FOXP1		MIR1284	1523	0
1_MACS_peak_3338_lociStitched	chr10	43946868	43952195	1	5328	21600.5	1211.89	ZNF487P	HNRNPF	ZNF487P	1524	0
2_MACS_peak_13837_lociStitched	chr19	10707097	10716543	2	4669	21582.2	1216.64	SLC44A2	LOC147727,AP1M2,ILF3,SLC44A2,CDKN2D,MIR1238,KRI1	SLC44A2	1525	0
1_MACS_peak_19296_lociStitched	chr22	41839727	41846005	1	6279	21624.6	1288.87	TOB2	ACO2,PHF5A	TOB2	1526	0
MACS_peak_1698	chr1	149812549	149818453	1	5905	22125.8	1794.23	HIST2H2AA4,HIST2H3A	HIST2H2BF,HIST2H4B,HIST2H3D,HIST2H2BE,HIST2H2BC,HIST2H2AB,HIST2H2AC,HIST2H3C,HIST2H2AA3	HIST2H2AA4	1527	0
3_MACS_peak_3695_lociStitched	chr10	84262417	84290333	3	19384	24320.4	3989.2	NRG3		NRG3	1528	0
2_MACS_peak_6501_lociStitched	chr12	78237932	78244842	2	6876	22119.6	1795.22	NAV3		NAV3	1529	0
4_MACS_peak_4274_lociStitched	chr11	3962965	3972868	4	9484	21619.2	1327.99	STIM1		STIM1	1530	0
1_MACS_peak_26611_lociStitched	chr7	86780491	86789450	1	8960	23426	3135.65	DMTF1	DMTF1	DMTF1	1531	0
2_MACS_peak_1508_lociStitched	chr1	112045791	112060491	2	8730	22636.5	2363.76	ADORA3	C1orf162	ADORA3	1532	0
3_MACS_peak_13377_lociStitched	chr18	68325865	68342687	3	7539	22630.6	2371.9			SOCS6	1533	0
7_MACS_peak_3057_lociStitched	chr10	6333339	6364048	7	13845	23120.8	2908.14			PFKFB3	1534	0
1_MACS_peak_5162_lociStitched	chr11	85773462	85781781	1	8320	22611.9	2400.03	PICALM		PICALM	1535	0
1_MACS_peak_1522_lociStitched	chr1	113160141	113165832	1	5692	21481.8	1278.2	ST7L,CAPZA1	ST7L	CAPZA1	1536	0
3_MACS_peak_28711_lociStitched	chr9	21986701	22006500	3	10418	23143.1	2961.93	CDKN2A,CDKN2B-AS1,CDKN2B	C9orf53,CDKN2A	CDKN2B-AS1	1537	0
MACS_peak_16448	chr2	131097652	131106471	1	8820	21423.1	1256.71	CCDC115,IMP4	PTPN18	IMP4	1538	0
1_MACS_peak_8859_lociStitched	chr14	107280172	107288152	1	7981	22876.3	2713.2			NCRNA00221	1539	0
4_MACS_peak_18777_lociStitched	chr22	22589768	22609394	4	10680	21780.9	1623.07	VPREB1	LOC96610	VPREB1	1540	0
4_MACS_peak_9362_lociStitched	chr15	64739670	64757699	4	11609	22840.9	2695.34	TRIP4	ZNF609	ZNF609	1541	0
MACS_peak_6815	chr12	113607443	113613064	1	5622	21042.2	899.922	DDX54	IQCD,C12orf52,DDX54,RASAL1,TPCN1,CCDC42B	DDX54	1542	0
3_MACS_peak_8442_lociStitched	chr14	77497848	77509031	3	9771	21814.7	1677.45		C14orf4	C14orf4	1543	0
2_MACS_peak_15489_lociStitched	chr2	42792500	42803155	2	6852	21472	1357.45	MTA3		MTA3	1544	0
3_MACS_peak_13038_lociStitched	chr18	18678572	18691937	3	11811	23966.1	3855.8	ROCK1		ROCK1	1545	0
4_MACS_peak_8761_lociStitched	chr14	105116094	105145162	4	11635	23196.3	3087.02		ADSSL1,INF2,TMEM179	INF2	1546	0
5_MACS_peak_21679_lociStitched	chr4	39353841	39368460	5	12141	22282.3	2175.31	RFC1	KLB	RFC1	1547	0
2_MACS_peak_26858_lociStitched	chr7	104617025	104629645	2	12479	23784.9	3682.52		MLL5,LOC723809,LOC100216545	LOC100216545	1548	0
1_MACS_peak_28398_lociStitched	chr8	135609291	135616125	1	6835	22367.7	2283.92	ZFAT,ZFAT-AS1		ZFAT-AS1	1549	0
2_MACS_peak_8030_lociStitched	chr14	50465420	50476431	2	7010	21762.1	1718.82	C14orf182		C14orf182	1550	0
MACS_peak_24571	chr6	31702060	31709192	1	7133	21174.2	1138.27	CLIC1,MSH5	BAT5,C6orf26,LY6G6C,DDAH2,C6orf25,LY6G6D,LY6G6F,MSH5,LY6G6E,C6orf27	CLIC1	1551	0
6_MACS_peak_25620_lociStitched	chr6	159125107	159146999	6	13064	22693.2	2659.88	SYTL3	MIR3918	MIR3918	1552	0
1_MACS_peak_18336_lociStitched	chr21	25416262	25424391	1	8130	21531.3	1504.68				1553	0
3_MACS_peak_23179_lociStitched	chr5	96291254	96311603	3	11440	23610.9	3595.67	LNPEP		LNPEP	1554	0
1_MACS_peak_26243_lociStitched	chr7	47186462	47194915	1	8454	21912.7	1915.45			TNS3	1555	0
1_MACS_peak_20922_lociStitched	chr3	156198439	156205168	1	6730	22701.6	2720.53	KCNAB1		SSR3	1556	0
2_MACS_peak_28411_lociStitched	chr8	141514401	141526237	2	8015	22168.8	2195.58	CHRAC1	TRAPPC9	CHRAC1	1557	0
1_MACS_peak_26674_lociStitched	chr7	94138292	94145933	1	7642	22545.5	2575.78	CASD1		CASD1	1558	0
4_MACS_peak_13581_lociStitched	chr19	2315492	2334410	4	13692	21691.4	1731	SPPL2B,LSM7	LINGO3,C19orf35,OAZ1	LSM7	1559	0
2_MACS_peak_5798_lociStitched	chr12	9819725	9827440	2	7715	21377.5	1438.08	CLEC2D	LOC374443,CLEC2D	CLEC2D	1560	0
4_MACS_peak_29781_lociStitched	chr9	139588990	139610028	4	10876	21761.7	1828.2	FAM69B	EGFL7,SNORA43,LCN10,SNORA17,LOC100128593,AGPAT2,LCN6,LCN8,SNHG7,MIR126,LCN15	FAM69B	1561	0
3_MACS_peak_18536_lociStitched	chr21	44580354	44598028	3	9835	21790.3	1859.3	CRYAA		CRYAA	1562	0
1_MACS_peak_12548_lociStitched	chr17	66283509	66289586	1	6078	21513.8	1590.96	ARSG,SLC16A6	AMZ2	SLC16A6	1563	0
2_MACS_peak_19548_lociStitched	chr3	147042	167024	2	8628	22599.6	2705.56			CHL1	1564	0
4_MACS_peak_21004_lociStitched	chr3	170066396	170087127	4	10860	25221.3	5342.38	SKIL	CLDN11	SKIL	1565	0
1_MACS_peak_1127_lociStitched	chr1	55675917	55684333	1	8417	21654.4	1801.87	USP24		USP24	1566	0
2_MACS_peak_25948_lociStitched	chr7	18559007	18574768	2	13318	24869.3	5019.88	HDAC9		HDAC9	1567	0
5_MACS_peak_16185_lociStitched	chr2	100475512	100500716	5	16648	23671.6	3825.97	AFF3		AFF3	1568	0
3_MACS_peak_551_lociStitched	chr1	26280628	26301192	3	9194	21651.8	1830.2	PAFAH2	STMN1,MIR3917,EXTL1	PAFAH2	1569	0
1_MACS_peak_20904_lociStitched	chr3	154577988	154583422	1	5435	21708.3	1889.4			MME	1570	0
5_MACS_peak_29154_lociStitched	chr9	97556527	97584015	5	16002	23400.5	3581.69	C9orf3,MIR2278		MIR2278	1571	0
2_MACS_peak_20589_lociStitched	chr3	113454792	113468585	2	13713	22724	2914.46	NAA50,ATP6V1A	KIAA2018	NAA50	1572	0
4_MACS_peak_22883_lociStitched	chr5	53815230	53835208	4	10805	22509.2	2701.03	SNX18		SNX18	1573	0
1_MACS_peak_12136_lociStitched	chr17	44267280	44273274	1	5995	21438.7	1635.76	KIAA1267,LOC644246		KIAA1267	1574	0
2_MACS_peak_18477_lociStitched	chr21	42597232	42606803	2	8220	21332.8	1545.72	BACE2	PLAC4	PLAC4	1575	0
3_MACS_peak_5552_lociStitched	chr11	128700209	128716202	3	10872	21808.1	2029.51	KCNJ1	KCNJ5,KCNJ1	KCNJ1	1576	0
2_MACS_peak_20128_lociStitched	chr3	48589686	48599538	2	9849	21073.4	1297.51	PFKFB4,UCN2	COL7A1,MIR711,UQCRC1,SHISA5	PFKFB4	1577	0
4_MACS_peak_23718_lociStitched	chr5	149777866	149793815	4	7862	21792.7	2023.93	TCOF1,CD74	TCOF1,RPS14	CD74	1578	0
1_MACS_peak_15132_lociStitched	chr2	8369964	8380206	1	10243	21308.5	1543.47	C2orf46		C2orf46	1579	0
5_MACS_peak_3102_lociStitched	chr10	12092363	12121520	5	12770	22267.2	2539.57	DHTKD1	UPF2	DHTKD1	1580	0
1_MACS_peak_22611_lociStitched	chr4	186728918	186734651	1	5734	21455.8	1742.83	SORBS2	SORBS2	SORBS2	1581	0
6_MACS_peak_20121_lociStitched	chr3	48506779	48522270	6	11720	21651.8	1956.51	TREX1,SHISA5,ATRIP	PLXNB1,CCDC72,ATRIP,CCDC51	TREX1	1582	0
1_MACS_peak_9535_lociStitched	chr15	70385678	70394089	1	8412	20998.9	1306.23	TLE3	MIR629	TLE3	1583	0
3_MACS_peak_28744_lociStitched	chr9	31323129	31350105	3	8891	22201.2	2560.02				1584	0
MACS_peak_23586	chr5	138722400	138730354	1	7955	20788.6	1154.13	MZB1,LOC389333	SPATA24,DNAJC18,PAIP2,SLC23A1	MZB1	1585	0
2_MACS_peak_1169_lociStitched	chr1	64292251	64302924	2	9847	20891.3	1263.68	ROR1		ROR1	1586	0
2_MACS_peak_23571_lociStitched	chr5	137672260	137691480	2	7556	21874.3	2246.82	KDM3B,FAM53C	CDC25C	KDM3B	1587	0
2_MACS_peak_11077_lociStitched	chr16	85477871	85496394	2	7497	21169.9	1542.97			KIAA0182	1588	0
4_MACS_peak_26688_lociStitched	chr7	95515012	95546333	4	15712	25382.5	5763.06	DYNC1I1		DYNC1I1	1589	0
4_MACS_peak_10715_lociStitched	chr16	53087867	53106753	4	9718	21768	2224.77	CHD9		CHD9	1590	0
1_MACS_peak_30706_lociStitched	chrX	131613325	131626068	1	12744	21171.2	1655.32	MBNL3	MBNL3	MBNL3	1591	0
1_MACS_peak_26131_lociStitched	chr7	35838639	35844125	1	5487	21404.7	1911.87	SEPT7	SEPT7	SEPT7	1592	0
3_MACS_peak_23353_lociStitched	chr5	123773306	123793142	3	9394	22305.6	2822.66			ZNF608	1593	0
4_MACS_peak_22532_lociStitched	chr4	178221799	178246526	4	15792	23134.6	3691.74	NEIL3		NEIL3	1594	0
2_MACS_peak_7748_lociStitched	chr13	114086205	114101610	2	5225	21434.5	1999.57	ADPRHL1	TMCO3,DCUN1D2	ADPRHL1	1595	0
1_MACS_peak_24255_lociStitched	chr6	12007935	12014490	1	6556	21040.9	1622.36	HIVEP1		HIVEP1	1596	0
1_MACS_peak_27166_lociStitched	chr7	139042918	139048777	1	5860	21292.8	1878.4	LUC7L2	C7orf55	LUC7L2	1597	0
3_MACS_peak_29478_lociStitched	chr9	125846899	125858135	3	8613	21583.2	2182.03	RABGAP1	NCRNA00287,MIR600	MIR600	1598	0
1_MACS_peak_4248_lociStitched	chr11	3008872	3016055	1	7184	20539.8	1152.87	NAP1L4	SNORA54	NAP1L4	1599	0
5_MACS_peak_29002_lociStitched	chr9	79073382	79088938	5	14487	21548.2	2162.28	GCNT1	GCNT1	GCNT1	1600	0
6_MACS_peak_8204_lociStitched	chr14	63976299	64011802	6	13658	23840.3	4462.73	PPP2R5E		PPP2R5E	1601	0
MACS_peak_10883	chr16	68313078	68321025	1	7948	20523.1	1162.65	SLC7A6	PRMT7,ESRP2,PLA2G15,SLC7A6OS	SLC7A6	1602	0
9_MACS_peak_989_lociStitched	chr1	45160458	45197980	9	13246	22805.9	3448.27	C1orf228	SNORD55,KIF2C,TMEM53,SNORD46,SNORD38A,RPS8,SNORD38B	KIF2C	1603	0
5_MACS_peak_6215_lociStitched	chr12	53590536	53618450	5	14298	21912.5	2562.51	ITGB7,RARG	ESPL1,MFSD5,ZNF740,CSAD	ITGB7	1604	0
1_MACS_peak_20862_lociStitched	chr3	149496970	149502894	1	5925	21775.4	2426.47	C3orf16	RNF13,COMMD2	C3orf16	1605	0
3_MACS_peak_11800_lociStitched	chr17	29813457	29837863	3	12892	22107	2784.72	RAB11FIP4	MIR193A	MIR193A	1606	0
1_MACS_peak_25793_lociStitched	chr7	2547639	2553329	1	5691	20155.1	833.585	LFNG	LFNG,C7orf27,IQCE	LFNG	1607	0
1_MACS_peak_20930_lociStitched	chr3	156692570	156698184	1	5615	21328.1	2007.57	LEKR1		LOC100498859	1608	0
3_MACS_peak_21880_lociStitched	chr4	78721628	78749200	3	11165	23833.2	4538.35	CNOT6L	MRPL1	CNOT6L	1609	0
6_MACS_peak_14427_lociStitched	chr19	38523371	38551483	6	14859	22621.7	3334.08	SIPA1L3		SIPA1L3	1610	0
1_MACS_peak_27930_lociStitched	chr8	67521044	67528188	1	7145	21119.8	1839.58	MYBL1		MYBL1	1611	0
3_MACS_peak_28015_lociStitched	chr8	81396460	81422671	3	10560	24017.1	4744.19	ZBTB10	ZBTB10	ZBTB10	1612	0
1_MACS_peak_15558_lociStitched	chr2	47167009	47177392	1	10384	21002.7	1738.11	MCFD2,TTC7A	MCFD2	MCFD2	1613	0
3_MACS_peak_17893_lociStitched	chr20	42305101	42312316	3	6615	20033.2	782.106	MYBL2	GTSF1L	MYBL2	1614	0
3_MACS_peak_25585_lociStitched	chr6	157336605	157355758	3	7830	21943.6	2713.98	ARID1B		ARID1B	1615	0
MACS_peak_6813	chr12	113589363	113601975	1	12613	20999	1798.47	DDX54,CCDC42B	RASAL1,C12orf52,DDX54	CCDC42B	1616	0
1_MACS_peak_10655_lociStitched	chr16	46721355	46727467	1	6113	20196.5	1001.76	VPS35,ORC6		ORC6	1617	0
5_MACS_peak_3063_lociStitched	chr10	7512242	7531486	5	13084	21684.1	2494.02			SFMBT2	1618	0
2_MACS_peak_22461_lociStitched	chr4	166174925	166183856	2	8929	22199.8	3018.68	KLHL2	GK3P	GK3P	1619	0
2_MACS_peak_623_lociStitched	chr1	27847299	27856461	2	8445	20313.1	1137		WASF2	WASF2	1620	0
2_MACS_peak_19854_lociStitched	chr3	31572138	31591139	2	9048	22850.6	3686.19	STT3B		STT3B	1621	0
4_MACS_peak_12958_lociStitched	chr18	8600735	8624644	4	8867	26013	6854.71	RAB12		RAB12	1622	0
3_MACS_peak_21924_lociStitched	chr4	81907527	81926080	3	9479	21554.9	2415.6		BMP3	BMP3	1623	0
4_MACS_peak_28180_lociStitched	chr8	103407108	103426158	4	9581	22214.2	3089.91	UBR5		UBR5	1624	0
5_MACS_peak_1850_lociStitched	chr1	155455530	155481299	5	10189	22617.5	3502.01	ASH1L		LOC645676	1625	0
6_MACS_peak_24181_lociStitched	chr6	5764149	5788195	6	10396	21465.9	2373.34	FARS2		NRN1	1626	0
4_MACS_peak_19669_lociStitched	chr3	13035201	13058636	4	11295	21825	2741.89	IQSEC1	IQSEC1	IQSEC1	1627	0
2_MACS_peak_1952_lociStitched	chr1	158977969	158986008	2	6916	20640.9	1562.78	IFI16		IFI16	1628	0
4_MACS_peak_18046_lociStitched	chr20	48428468	48450491	4	9473	21675	2625.14	SLC9A8		SLC9A8	1629	0
4_MACS_peak_5634_lociStitched	chr12	2290112	2304569	4	7720	21334.2	2288.54	CACNA1C		CACNA1C	1630	0
4_MACS_peak_11183_lociStitched	chr16	89097730	89112364	4	11350	20568.1	1524.86		ACSF3	ACSF3	1631	0
3_MACS_peak_5496_lociStitched	chr11	122930958	122941445	3	7199	20650	1608.71	HSPA8	HSPA8,LOC341056	HSPA8	1632	0
2_MACS_peak_3457_lociStitched	chr10	63836517	63844449	2	7314	20686.7	1650.65	ARID5B		ARID5B	1633	0
2_MACS_peak_14215_lociStitched	chr19	19771792	19781289	2	7521	20304.6	1269.75	ZNF101,ATP13A1	PBX4,LPAR2,GMIP	ATP13A1	1634	0
4_MACS_peak_27516_lociStitched	chr8	22297377	22314507	4	12914	20777	1748.97	PPP3CC		PPP3CC	1635	0
2_MACS_peak_8063_lociStitched	chr14	51325878	51344412	2	7459	21197.3	2177.74	ABHD12B	ABHD12B,NIN	ABHD12B	1636	0
1_MACS_peak_16748_lociStitched	chr2	173418227	173423743	1	5517	20339.7	1331.56	PDK1		PDK1	1637	0
4_MACS_peak_17279_lociStitched	chr2	232565906	232583107	4	10657	20813.2	1818.15	MIR1244-1,PTMA	PTMA,MIR1244-2	PTMA	1638	0
3_MACS_peak_3254_lociStitched	chr10	29766229	29774519	3	7292	20664.5	1672.09	SVIL		MIR604	1639	0
2_MACS_peak_19780_lociStitched	chr3	17778886	17789835	2	7940	20773.5	1783.59	TBC1D5	TBC1D5	TBC1D5	1640	0
2_MACS_peak_13295_lociStitched	chr18	56062130	56079141	2	8594	21663.5	2675.83	NEDD4L	MIR122	MIR122	1641	0
2_MACS_peak_5167_lociStitched	chr11	85902139	85914782	2	5864	21756.1	2770.08		EED	EED	1642	0
10_MACS_peak_2539_lociStitched	chr1	206929788	206977662	10	24325	24774.8	5811.9	IL19,IL10	IL19	IL10	1643	0
3_MACS_peak_19497_lociStitched	chr22	50539235	50552104	3	9992	20452.7	1492.8	MOV10L1	MOV10L1,MLC1,TTLL8	MOV10L1	1644	0
4_MACS_peak_29316_lociStitched	chr9	115086803	115097521	4	8229	20618.2	1660.22	MIR3134,ROD1	HSDL2,ROD1	ROD1	1645	0
2_MACS_peak_7659_lociStitched	chr13	99219408	99230345	2	9645	22490.8	3543.59	STK24	STK24	STK24	1646	0
1_MACS_peak_25461_lociStitched	chr6	146129464	146137595	1	8132	20855.2	1922.17	FBXO30		FBXO30	1647	0
4_MACS_peak_2982_lociStitched	chr10	1454758	1477742	4	10448	21609.6	2682.23	ADARB2		NCRNA00168	1648	0
2_MACS_peak_18850_lociStitched	chr22	23763063	23776545	2	8681	21080.5	2171.95		ZDHHC8P1	ZDHHC8P1	1649	0
2_MACS_peak_7983_lociStitched	chr14	40682752	40690680	2	7591	20288.5	1381.06			FBXO33	1650	0
5_MACS_peak_21378_lociStitched	chr3	197499716	197530082	5	12468	25841.5	6938.63	LRCH3,FYTTD1	KIAA0226	LRCH3	1651	0
2_MACS_peak_7376_lociStitched	chr13	42844599	42853990	2	7585	21050.9	2149.6	AKAP11		AKAP11	1652	0
1_MACS_peak_362_lociStitched	chr1	16969011	16972425	1	3415	21032.3	2135.46	MST1P2	CROCCP2,NBPF1	MST1P2	1653	0
7_MACS_peak_20826_lociStitched	chr3	141813412	141848677	7	15958	27852.3	8957.31	TFDP2	TFDP2	TFDP2	1654	0
3_MACS_peak_2024_lociStitched	chr1	161144895	161157867	3	8692	20450.4	1557.94	B4GALT3	NDUFS2,DEDD,PPOX,FCER1G,USP21,TOMM40L,APOA2,UFC1,ADAMTS4	B4GALT3	1655	0
3_MACS_peak_22347_lociStitched	chr4	146970048	146984599	3	10688	20860.3	1973.12			ZNF827	1656	0
2_MACS_peak_5704_lociStitched	chr12	6640808	6650154	2	7676	20530.4	1646.77	GAPDH,NCAPD2,IFFO1	IFFO1,MRPL51,NOP2,SCARNA11,SCARNA10	GAPDH	1657	0
7_MACS_peak_750_lociStitched	chr1	32774401	32802581	7	13567	22234	3361.87	MARCKSL1,HDAC1	LOC100128071,TSSK3,LCK	MARCKSL1	1658	0
3_MACS_peak_7690_lociStitched	chr13	103244145	103266397	3	9180	24868.8	5999.14	TPP2		TPP2	1659	0
3_MACS_peak_7251_lociStitched	chr13	31308325	31319231	3	8357	20706.1	1837.66	ALOX5AP		ALOX5AP	1660	0
2_MACS_peak_212_lociStitched	chr1	9710961	9718580	2	7365	20163.7	1298.28	PIK3CD,C1orf200		C1orf200	1661	0
3_MACS_peak_18287_lociStitched	chr20	62730219	62752250	3	7164	20885.4	2020.24	OPRL1,NPBWR2	C20orf201,MYT1,SOX18,TCEA2,RGS19	NPBWR2	1662	0
3_MACS_peak_28127_lociStitched	chr8	100235619	100257240	3	10166	22481.5	3621.52	VPS13B		VPS13B	1663	0
6_MACS_peak_22417_lociStitched	chr4	154433971	154462151	6	18576	23826.2	4976.59	KIAA0922	KIAA0922	KIAA0922	1664	0
3_MACS_peak_23238_lociStitched	chr5	109251721	109266146	3	8947	21015.8	2181.06		LOC100289673	LOC100289673	1665	0
7_MACS_peak_3420_lociStitched	chr10	62014115	62052465	7	16789	23263.1	4437.1	ANK3		ANK3	1666	0
3_MACS_peak_30141_lociStitched	chrX	37671161	37684913	3	11092	20128.8	1303.69	CYBB	DYNLT3	DYNLT3	1667	0
2_MACS_peak_20716_lociStitched	chr3	128898537	128904284	2	5702	20446.1	1659.73	CNBP	ISY1,CNBP	CNBP	1668	0
1_MACS_peak_9319_lociStitched	chr15	63480702	63488326	1	7625	20674.8	1933.45	RAB8B	RPS27L	RAB8B	1669	0
2_MACS_peak_12120_lociStitched	chr17	43384430	43395762	2	8928	20624.2	1900.38	MAP3K14	LOC100133991,C17orf46	MAP3K14	1670	0
MACS_peak_5860	chr12	12848305	12851750	1	3446	19557.3	860.905	GPR19	CDKN1B,APOLD1	GPR19	1671	0
2_MACS_peak_20723_lociStitched	chr3	129029620	129037128	2	7425	20547.1	1852.22	C3orf47,H1FX	C3orf37	C3orf47	1672	0
1_MACS_peak_18480_lociStitched	chr21	42738611	42744581	1	5971	19810.3	1122.96	MX2	FAM3B,MX1	MX2	1673	0
1_MACS_peak_24288_lociStitched	chr6	13707751	13713408	1	5658	19732.7	1072	RANBP9		RANBP9	1674	0
4_MACS_peak_17469_lociStitched	chr20	3868533	3889705	4	10873	21455.7	2803.17	PANK2	MIR103-2AS,MAVS,MIR103-2	PANK2	1675	0
2_MACS_peak_20437_lociStitched	chr3	73481053	73502431	2	9763	21655.9	3014.3	PDZRN3		PDZRN3	1676	0
6_MACS_peak_29588_lociStitched	chr9	130832673	130878270	6	10255	22224	3583.92	SLC25A25,LOC100289019	LCN2,LOC389791,PTGES2,C9orf16,NAIF1	SLC25A25	1677	0
5_MACS_peak_8166_lociStitched	chr14	61491903	61508341	5	14444	21453.2	2824.05	SLC38A6	TRMT5	SLC38A6	1678	0
3_MACS_peak_7675_lociStitched	chr13	100150103	100160400	3	10171	22454.7	3829.45	TM9SF2		TM9SF2	1679	0
1_MACS_peak_21172_lociStitched	chr3	185649054	185656413	1	7360	21465.5	2865.59	TRA2B	LOC344887	TRA2B	1680	0
6_MACS_peak_13698_lociStitched	chr19	5948381	5991009	6	15128	22818.8	4220.17	RANBP3	CAPS,NDUFA11,RANBP3,VMAC	RANBP3	1681	0
3_MACS_peak_25996_lociStitched	chr7	23565685	23585417	3	9780	21947.9	3350.49	TRA2A	RPS2P32,CLK2P	TRA2A	1682	0
1_MACS_peak_20773_lociStitched	chr3	133290521	133295791	1	5271	20755.9	2160.7	CDV3		CDV3	1683	0
4_MACS_peak_27750_lociStitched	chr8	50142567	50166765	4	12322	20413.4	1824.53			C8orf22	1684	0
2_MACS_peak_4684_lociStitched	chr11	60213468	60228641	2	9407	20691.4	2106.01	MS4A1,MS4A5	MS4A14,MS4A12	MS4A1	1685	0
MACS_peak_15858	chr2	70358663	70361856	1	3194	19249	687.772		PCBP1,LOC100133985,LOC400960	LOC100133985	1686	0
4_MACS_peak_26293_lociStitched	chr7	50472327	50485512	4	11584	21328.1	2772.81	IKZF1	FIGNL1	FIGNL1	1687	0
2_MACS_peak_22296_lociStitched	chr4	140473780	140482660	2	8718	20162.9	1609.94	SETD7		SETD7	1688	0
2_MACS_peak_22285_lociStitched	chr4	139996902	140006763	2	9788	20617.4	2069.82	ELF2		ELF2	1689	0
4_MACS_peak_30302_lociStitched	chrX	48792188	48803670	4	10079	19212.8	667.104	OTUD5	PQBP1,SLC35A2,KCND1,TIMM17B,PIM2	OTUD5	1690	0
3_MACS_peak_30604_lociStitched	chrX	118887589	118910321	3	10210	20065.5	1520.77	ANKRD58	RPL39,SNORA69	ANKRD58	1691	0
2_MACS_peak_8531_lociStitched	chr14	91136192	91142709	2	6422	19745.2	1212.81	TTC7B		TTC7B	1692	0
2_MACS_peak_24143_lociStitched	chr6	4017023	4024153	2	6455	20197.2	1666.28	PRPF4B		PRPF4B	1693	0
2_MACS_peak_25293_lociStitched	chr6	116782291	116798605	2	9555	20495.3	1973.99	FAM26F	FAM26E	FAM26F	1694	0
1_MACS_peak_26130_lociStitched	chr7	35764282	35772193	1	7912	20136.7	1630.46		HERPUD2	HERPUD2	1695	0
1_MACS_peak_20867_lociStitched	chr3	150124581	150131056	1	6476	20969.3	2464.39	TSC22D2		TSC22D2	1696	0
1_MACS_peak_18424_lociStitched	chr21	36417995	36424248	1	6254	20149.7	1651.42	RUNX1	C21orf96	RUNX1	1697	0
5_MACS_peak_15202_lociStitched	chr2	11992571	12020574	5	10846	20876.2	2388.66		MIR4262	MIR4262	1698	0
7_MACS_peak_19029_lociStitched	chr22	32022263	32073428	7	14473	22543.3	4057.38	PISD		PISD	1699	0
3_MACS_peak_14763_lociStitched	chr19	48824355	48837940	3	8779	20361.2	1895.11	TMEM143,EMP3	CCDC114,ZNF114,SYNGR4	EMP3	1700	0
1_MACS_peak_7513_lociStitched	chr13	52023463	52029188	1	5726	20071.3	1619.03	INTS6		INTS6	1701	0
4_MACS_peak_10664_lociStitched	chr16	46860020	46871060	4	9964	20190	1742.11	C16orf87	GPT2	C16orf87	1702	0
8_MACS_peak_10177_lociStitched	chr16	10390404	10432778	8	11915	22076.9	3665.35			ATF7IP2	1703	0
2_MACS_peak_7449_lociStitched	chr13	49941925	49951348	2	9418	20832.4	2427.36	CAB39L		CAB39L	1704	0
MACS_peak_10881	chr16	68297024	68304910	1	7887	19865.6	1468.37	SLC7A6	PRMT7,ESRP2,PLA2G15,SLC7A6OS	SLC7A6	1705	0
3_MACS_peak_8571_lociStitched	chr14	91957903	91977978	3	10729	20930.2	2545.51	SMEK1		SMEK1	1706	0
1_MACS_peak_20651_lociStitched	chr3	122100683	122106084	1	5402	19634.8	1250.33	CCDC58,FAM162A	WDR5B	FAM162A	1707	0
3_MACS_peak_26955_lociStitched	chr7	112196025	112215420	3	7556	23295.3	4922.45			C7orf53	1708	0
2_MACS_peak_13162_lociStitched	chr18	42300183	42313328	2	10865	21239.7	2866.92	SETBP1		SETBP1	1709	0
1_MACS_peak_16488_lociStitched	chr2	135492493	135499328	1	6836	19639	1268.58		TMEM163	TMEM163	1710	0
2_MACS_peak_17117_lociStitched	chr2	219080967	219094892	2	8722	20228.8	1877.09	ARPC2	CXCR1,GPBAR1,PNKD,AAMP	ARPC2	1711	0
5_MACS_peak_7275_lociStitched	chr13	34297884	34332861	5	13023	20618.9	2273.51			RFC3	1712	0
5_MACS_peak_24848_lociStitched	chr6	43334834	43354755	5	10030	21080.4	2735.15	ZNF318	ABCC10	ZNF318	1713	0
2_MACS_peak_28677_lociStitched	chr9	14314438	14323888	2	8717	19928.2	1591.38	NFIB	NFIB	NFIB	1714	0
1_MACS_peak_1717_lociStitched	chr1	150334730	150340222	1	5493	19646.5	1311.49	RPRD2	PRPF3	RPRD2	1715	0
2_MACS_peak_8817_lociStitched	chr14	106281343	106289677	2	7331	18939.8	616.716			KIAA0125	1716	0
2_MACS_peak_21606_lociStitched	chr4	26858300	26869977	2	8666	19773.8	1456.12	STIM2	STIM2	STIM2	1717	0
1_MACS_peak_22951_lociStitched	chr5	65438951	65444205	1	5255	19715.1	1399.67	SREK1		SREK1	1718	0
4_MACS_peak_1406_lociStitched	chr1	105464649	105477473	4	9601	20521	2205.73			LOC100129138	1719	0
3_MACS_peak_22362_lociStitched	chr4	148965255	148984316	3	12226	21466.5	3154.6	ARHGAP10		ARHGAP10	1720	0
2_MACS_peak_7436_lociStitched	chr13	49104364	49117567	2	5655	21415.3	3110.63	RCBTB2		RCBTB2	1721	0
2_MACS_peak_7730_lociStitched	chr13	113236032	113243370	2	6856	20748.9	2445.02	TUBGCP3		TUBGCP3	1722	0
3_MACS_peak_16405_lociStitched	chr2	122560204	122578632	3	7928	20554.6	2264.8		TSN	TSN	1723	0
MACS_peak_5695	chr12	6532581	6538473	1	5893	19391.8	1102.98		CD27,SCNN1A,VAMP1,TAPBPL,LOC678655,LTBR	CD27	1724	0
7_MACS_peak_3933_lociStitched	chr10	105518041	105550048	7	14432	20801.3	2518.95	SH3PXD2A		SH3PXD2A	1725	0
3_MACS_peak_28150_lociStitched	chr8	101956149	101966947	3	9900	20042.2	1829.18	YWHAZ	YWHAZ	YWHAZ	1726	0
2_MACS_peak_7367_lociStitched	chr13	42159933	42171609	2	8674	21086.9	2874.63	KIAA0564		C13orf15	1727	0
4_MACS_peak_17055_lociStitched	chr2	212286321	212320397	4	11187	22861.6	4658.19	ERBB4		CPS1-IT	1728	0
3_MACS_peak_11867_lociStitched	chr17	34899643	34912254	3	8547	19795.5	1595.29	GGNBP2	MRM1,DHRS11,PIGW,MYO19	GGNBP2	1729	0
1_MACS_peak_2346_lociStitched	chr1	194256433	194260979	1	4547	19328.2	1166.05				1730	0
2_MACS_peak_8404_lociStitched	chr14	75149087	75163437	2	6856	19725.5	1579.93	KIAA0317	FCF1	KIAA0317	1731	0
1_MACS_peak_19529_lociStitched	chr22	50905454	50914387	1	8934	19325.7	1186.3	SBF1	SCO2,NCAPH2,LMF2,ADM2,MIOX	SBF1	1732	0
2_MACS_peak_10690_lociStitched	chr16	48459123	48469685	2	8458	19643.2	1523.04		SIAH1	SIAH1	1733	0
3_MACS_peak_18809_lociStitched	chr22	23087575	23099002	3	9822	18992.8	874.165			MIR650	1734	0
MACS_peak_14994	chr19	56164727	56170429	1	5703	19308.7	1190.58	U2AF2	EPN1,ZNF784,ZNF580,CCDC106,ZNF581,ZNF865	U2AF2	1735	0
1_MACS_peak_4629_lociStitched	chr11	49808083	49813395	1	5313	19607.1	1490.02	LOC440040		OR4C13	1736	0
2_MACS_peak_22219_lociStitched	chr4	120289910	120298710	2	8798	20988	2882		FABP2,FLJ14186	FLJ14186	1737	0
2_MACS_peak_25409_lociStitched	chr6	139348614	139354386	2	5599	19096.1	993.938	C6orf115	REPS1	C6orf115	1738	0
4_MACS_peak_88_lociStitched	chr1	3571753	3594514	4	9335	20261.8	2162.3	TP73	TP73,WDR8,MEGF6,TPRG1L	TP73	1739	0
3_MACS_peak_12950_lociStitched	chr18	3912576	3926732	3	11636	19274.8	1182.03		DLGAP1	DLGAP1	1740	0
3_MACS_peak_13958_lociStitched	chr19	13250839	13279264	3	10036	20184.6	2092.08	STX10,NACC1,IER2	TRMT1,LYL1	IER2	1741	0
1_MACS_peak_7694_lociStitched	chr13	103497087	103501167	1	4081	19809.6	1717.68	ERCC5	LOC121952,KDELC1,BIVM	ERCC5	1742	0
2_MACS_peak_15499_lociStitched	chr2	43018699	43039196	2	8860	20732.7	2644.11	HAAO	OXER1	HAAO	1743	0
MACS_peak_30800	chrX	153230686	153239293	1	8608	18834.7	748.809	HCFC1,TMEM187	MIR718,ARHGAP4,MIR3202-1,NAA10,RENBP,MIR3202-2,IRAK1	HCFC1	1744	0
3_MACS_peak_22239_lociStitched	chr4	124317246	124340661	3	8840	21743.2	3694.89	SPRY1		SPRY1	1745	0
1_MACS_peak_22835_lociStitched	chr5	43063682	43069042	1	5361	19060.2	1021.08	LOC100132356	LOC648987,LOC153684,C5orf39	LOC100132356	1746	0
2_MACS_peak_28649_lociStitched	chr9	6749873	6759801	2	6596	19567.1	1541.82	KDM4C		KDM4C	1747	0
7_MACS_peak_13428_lociStitched	chr18	74832777	74865195	7	15624	21434.8	3423.34	MBP		MBP	1748	0
5_MACS_peak_13741_lociStitched	chr19	7400972	7415884	5	10378	19501.9	1501.64		ARHGEF18	ARHGEF18	1749	0
3_MACS_peak_24327_lociStitched	chr6	16199159	16207236	3	7873	19639.2	1662.25		GMPR	GMPR	1750	0
1_MACS_peak_6362_lociStitched	chr12	57912805	57918809	1	6005	19203.2	1232.02	MBD6,DDIT3	ARHGAP9,KIF5A,MARS,DDIT3,DCTN2	MBD6	1751	0
6_MACS_peak_27875_lociStitched	chr8	61877402	61919204	6	14939	22677.6	4723.63	LOC100130298		LOC100130298	1752	0
MACS_peak_5766	chr12	8760933	8766754	1	5822	19183.7	1232.89	AICDA	MFAP5	AICDA	1753	0
4_MACS_peak_15565_lociStitched	chr2	47527110	47553844	4	9484	20831.1	2905.99		EPCAM	EPCAM	1754	0
1_MACS_peak_17028_lociStitched	chr2	206947444	206952608	1	5165	18627.1	705.919	INO80D	LOC100329109	INO80D	1755	0
2_MACS_peak_3355_lociStitched	chr10	46073650	46091018	2	9024	20831.2	2916.09	MARCH8	MARCH8	MARCH8	1756	0
2_MACS_peak_682_lociStitched	chr1	29247288	29255875	2	5379	19537.1	1630.67	EPB41	EPB41	EPB41	1757	0
3_MACS_peak_15446_lociStitched	chr2	37548017	37578528	3	14755	22083.9	4180.01	QPCT	PRKD3	QPCT	1758	0
5_MACS_peak_29984_lociStitched	chrX	13432850	13447187	5	9036	18998	1101.08			ATXN3L	1759	0
3_MACS_peak_16341_lociStitched	chr2	113930470	113939594	3	6337	18944.2	1082.11	LOC440839,PSD4	IL1RN	PSD4	1760	0
1_MACS_peak_4993_lociStitched	chr11	71158119	71165447	1	7329	19783.4	1927.26	NADSYN1,DHCR7	DHCR7	DHCR7	1761	0
3_MACS_peak_1866_lociStitched	chr1	155654624	155672057	3	6212	20142.1	2297.67	YY1AP1,DAP3	MSTO2P,YY1AP1	DAP3	1762	0
1_MACS_peak_24002_lociStitched	chr5	176852085	176859793	1	7709	19216.8	1378.19	GRK6	F12,PRR7,DBN1,PFN3,SLC34A1	GRK6	1763	0
4_MACS_peak_19236_lociStitched	chr22	39914376	39931259	4	11737	20241	2407.52	ATF4,RPS19BP1	MGAT3,ATF4,CACNA1I,SMCR7L	RPS19BP1	1764	0
1_MACS_peak_21100_lociStitched	chr3	181415135	181420950	1	5816	20727	2908.08	SOX2OT	SOX2	SOX2	1765	0
1_MACS_peak_28308_lociStitched	chr8	126008735	126014742	1	6008	19310.1	1518.57	SQLE	ZNF572	SQLE	1766	0
2_MACS_peak_21734_lociStitched	chr4	43557487	43568877	2	10477	19888.1	2099.18			GRXCR1	1767	0
6_MACS_peak_3120_lociStitched	chr10	13824680	13874754	6	11590	23014	5227.73	FRMD4A		PRPF18	1768	0
2_MACS_peak_1365_lociStitched	chr1	93810311	93819635	2	8300	20368.3	2582.75	DR1,LOC100131564		DR1	1769	0
6_MACS_peak_7284_lociStitched	chr13	34349232	34383261	6	13638	20032.9	2252.72		RFC3	RFC3	1770	0
MACS_peak_8626	chr14	95979193	95987339	1	8147	19625.3	1847.51		GLRX5,C14orf49,SCARNA13,SNHG10	SCARNA13	1771	0
4_MACS_peak_22965_lociStitched	chr5	67509930	67547451	4	12742	22966.6	5196.66	PIK3R1	PIK3R1	PIK3R1	1772	0
5_MACS_peak_853_lociStitched	chr1	38388074	38406581	5	10279	19639.6	1880.31	INPP5B	SF3A3	INPP5B	1773	0
4_MACS_peak_3366_lociStitched	chr10	47636806	47671820	4	11474	21810.2	4051.12	ANTXRL		ANTXRL	1774	0
3_MACS_peak_1987_lociStitched	chr1	160537297	160560762	3	10087	21653.5	3909.27	CD84	SLAMF6,CD84	CD84	1775	0
5_MACS_peak_1330_lociStitched	chr1	92931928	92971028	5	11808	21614.5	3870.9	GFI1		GFI1	1776	0
4_MACS_peak_25401_lociStitched	chr6	138120552	138142781	4	12924	20557.4	2818.64		TNFAIP3	TNFAIP3	1777	0
7_MACS_peak_27399_lociStitched	chr8	6563428	6606163	7	12754	21132.5	3401.71	AGPAT5		AGPAT5	1778	0
4_MACS_peak_17624_lociStitched	chr20	23329843	23347779	4	11581	20461.4	2731.65	NXT1,GZF1		GZF1	1779	0
2_MACS_peak_5901_lociStitched	chr12	15721323	15729885	2	8246	19014.5	1289.44	PTPRO	PTPRO	PTPRO	1780	0
2_MACS_peak_6928_lociStitched	chr12	122016660	122029585	2	6734	19555.5	1834.06	KDM2B	ORAI1	KDM2B	1781	0
2_MACS_peak_19603_lociStitched	chr3	9820538	9837826	2	8648	19442.1	1723.61	ARPC4,TADA3,ARPC4-TTLL3	TTLL3,RPUSD3,BRPF1,OGG1,CAMK1	ARPC4	1782	0
2_MACS_peak_17316_lociStitched	chr2	234421063	234431707	2	8217	19334.8	1623.21	USP40		USP40	1783	0
1_MACS_peak_26174_lociStitched	chr7	42303358	42313840	1	10483	20780.6	3084.85		GLI3	GLI3	1784	0
1_MACS_peak_20338_lociStitched	chr3	62706941	62713908	1	6968	18951.6	1270.08	CADPS		CADPS	1785	0
6_MACS_peak_11981_lociStitched	chr17	38686725	38717957	6	14892	21050.4	3373.06	CCR7	TNS4	CCR7	1786	0
2_MACS_peak_7812_lociStitched	chr14	22850432	22862419	2	10847	19899.6	2229.58			DAD1	1787	0
1_MACS_peak_26903_lociStitched	chr7	106807032	106811598	1	4567	19905.9	2244.65	HBP1		HBP1	1788	0
2_MACS_peak_2831_lociStitched	chr1	235476537	235495193	2	9436	20691.4	3031.6	GGPS1,ARID4B	GGPS1,TBCE	ARID4B	1789	0
5_MACS_peak_15398_lociStitched	chr2	33163269	33177560	5	11942	19793	2146.51	LOC100271832,LTBP1		LTBP1	1790	0
4_MACS_peak_24657_lociStitched	chr6	34329500	34362324	4	9900	21059.9	3416.98	NUDT3	RPS10	NUDT3	1791	0
3_MACS_peak_16074_lociStitched	chr2	89566653	89592501	3	12209	23870.6	6283.65			ANKRD36BP2	1792	0
2_MACS_peak_4136_lociStitched	chr10	129856242	129864542	2	7829	18958.9	1408.51	PTPRE		PTPRE	1793	0
2_MACS_peak_22096_lociStitched	chr4	105396478	105417379	2	11102	20574.9	3026.46	CXXC4		CXXC4	1794	0
1_MACS_peak_27731_lociStitched	chr8	42944485	42951096	1	6612	19028.4	1492.1	SGK196	FNTA,HGSNAT	SGK196	1795	0
2_MACS_peak_3243_lociStitched	chr10	27525690	27533039	2	6056	19130.9	1607.23	ACBD5	ACBD5,LOC387646	ACBD5	1796	0
4_MACS_peak_21112_lociStitched	chr3	182683720	182699658	4	12359	21371.3	3852.21	DCUN1D1		DCUN1D1	1797	0
2_MACS_peak_15935_lociStitched	chr2	75642072	75660895	2	9620	19975	2471.46			FAM176A	1798	0
2_MACS_peak_26895_lociStitched	chr7	106356638	106373670	2	11293	20709.2	3210.53			FLJ36031	1799	0
2_MACS_peak_29112_lociStitched	chr9	95819842	95835665	2	9450	19005	1512.68	SUSD3	C9orf89	SUSD3	1800	0
6_MACS_peak_23414_lociStitched	chr5	126111614	126144660	6	8774	21526.2	4041.53	LMNB1		LMNB1	1801	0
4_MACS_peak_15703_lociStitched	chr2	61645906	61671649	4	13038	20730.8	3274.51	USP34	SNORA70B	SNORA70B	1802	0
2_MACS_peak_10105_lociStitched	chr16	3625096	3638977	2	8519	18699.1	1247.9	SLX4,NLRC3		NLRC3	1803	0
1_MACS_peak_16614_lociStitched	chr2	155999123	156004549	1	5427	18797.3	1354.33			KCNJ3	1804	0
1_MACS_peak_3489_lociStitched	chr10	70090449	70097058	1	6610	18924.9	1500.24	HNRNPH3,PBLD	HNRNPH3	PBLD	1805	0
3_MACS_peak_23223_lociStitched	chr5	106846906	106859821	3	10780	19583	2164.55	EFNA5		EFNA5	1806	0
2_MACS_peak_19000_lociStitched	chr22	30818160	30832568	2	6556	19033	1623.78	MTFP1,SEC14L2	SEC14L2,RNF215,SEC14L3,SDC4P	MTFP1	1807	0
4_MACS_peak_22483_lociStitched	chr4	174088658	174117279	4	12117	21686.1	4287.43	GALNT7		GALNT7	1808	0
5_MACS_peak_10332_lociStitched	chr16	16092141	16133168	5	10702	20813	3425.75	ABCC1	ABCC1	ABCC1	1809	0
MACS_peak_1699	chr1	149819622	149824396	1	4775	18738.4	1358.2	HIST2H2BC,HIST2H3A,HIST2H2AA4	HIST2H2BF,BOLA1,HIST2H4B,HIST2H3D,HIST2H2BE,HIST2H2AB,HIST2H2AC,HIST2H3C,HIST2H2AA3	HIST2H2BC	1810	0
5_MACS_peak_11173_lociStitched	chr16	88855423	88878632	5	12548	19402.7	2033.11	APRT,CDT1	FAM38A,GALNS,TRAPPC2L	CDT1	1811	0
3_MACS_peak_12638_lociStitched	chr17	73388931	73409266	3	12030	20103.2	2745.22	MIR3678,GRB2	KIAA0195	GRB2	1812	0
2_MACS_peak_7507_lociStitched	chr13	51372699	51386060	2	6130	20616	3268.1	DLEU7		DLEU7	1813	0
MACS_peak_10882	chr16	68305851	68311064	1	5214	18445.7	1119.23	SLC7A6	PRMT7,ESRP2,PLA2G15,SLC7A6OS	SLC7A6	1814	0
1_MACS_peak_20174_lociStitched	chr3	49725778	49729152	1	3375	19234.8	1910.36	RNF123,MST1	GMPPB,AMIGO3,APEH	RNF123	1815	0
2_MACS_peak_1199_lociStitched	chr1	67389857	67400855	2	9811	19558.8	2245.79	MIER1,WDR78	MIER1	MIER1	1816	0
7_MACS_peak_5353_lociStitched	chr11	116849708	116874405	7	13625	20414.5	3111.82	SIK3		SIK3	1817	0
2_MACS_peak_11907_lociStitched	chr17	36852124	36863840	2	6701	18692.9	1411.78	MLLT6	CISD3,PCGF2,PSMB3,C17orf96	MLLT6	1818	0
1_MACS_peak_18915_lociStitched	chr22	24946369	24953448	1	7080	18484	1207.68	C22orf13,SNRPD3	GGT1,C22orf36	C22orf13	1819	0
2_MACS_peak_29380_lociStitched	chr9	117687490	117695635	2	8141	18515.2	1245.37	TNFSF8		TNFSF8	1820	0
1_MACS_peak_21302_lociStitched	chr3	195159896	195165212	1	5317	19230.6	1962.67	ACAP2		ACAP2	1821	0
4_MACS_peak_15624_lociStitched	chr2	54770254	54809547	4	13954	22789.9	5524.6	SPTBN1	RPL23AP32	SPTBN1	1822	0
3_MACS_peak_25041_lociStitched	chr6	88401031	88413029	3	9705	19530.3	2273.62	NCRNA00120,AKIRIN2		NCRNA00120	1823	0
2_MACS_peak_21295_lociStitched	chr3	194868145	194880307	2	10641	20091.6	2837.39	C3orf21		C3orf21	1824	0
1_MACS_peak_22495_lociStitched	chr4	174288277	174294050	1	5774	18683.2	1439.21	SAP30	HMGB2,SCRG1	SAP30	1825	0
3_MACS_peak_11089_lociStitched	chr16	85767958	85796164	3	15103	19484.7	2242.38	C16orf74,MIR1910	GINS2,COX4NB,COX4I1	C16orf74	1826	0
1_MACS_peak_4140_lociStitched	chr10	131268107	131274903	1	6797	18327.5	1088.72	MGMT		MGMT	1827	0
3_MACS_peak_5564_lociStitched	chr11	129865760	129875119	3	7512	18708.6	1487.15	PRDM10,NCRNA00167	PRDM10	NCRNA00167	1828	0
MACS_peak_13515	chr19	1257575	1263947	1	6373	18286.4	1066.67	MIDN	CIRBP,C19orf23,ATP5D,C19orf26,EFNA2,C19orf24	CIRBP	1829	0
3_MACS_peak_21253_lociStitched	chr3	188409786	188431166	3	14758	23186.6	5982.12	LPP		TPRG1	1830	0
4_MACS_peak_19535_lociStitched	chr22	50967937	50980375	4	8685	18629.6	1472.66	TYMP,ODF3B	C22orf41,SCO2,NCAPH2,CPT1B,LMF2,LOC100144603,ADM2,MIOX,KLHDC7B,CHKB,TYMP	ODF3B	1831	0
2_MACS_peak_7575_lociStitched	chr13	70255701	70263355	2	7514	20378	3233.05			ATXN8OS	1832	0
1_MACS_peak_16672_lociStitched	chr2	162651389	162658459	1	7071	18956.8	1821.94	SLC4A10		SLC4A10	1833	0
2_MACS_peak_8665_lociStitched	chr14	100033011	100041214	2	8195	17784.1	668.544	CCDC85C		CCDC85C	1834	0
2_MACS_peak_19815_lociStitched	chr3	25701022	25708919	2	7807	18703.3	1595.19	TOP2B		TOP2B	1835	0
3_MACS_peak_23997_lociStitched	chr5	176782582	176797011	3	8373	18479.2	1375.08	RGS14	F12,LMAN2,SLC34A1,MXD3,PFN3	RGS14	1836	0
1_MACS_peak_6260_lociStitched	chr12	54671424	54676007	1	4584	18299.5	1209.91	HNRNPA1P10,HNRNPA1,CBX5	CBX5,NFE2,COPZ1	CBX5	1837	0
2_MACS_peak_28187_lociStitched	chr8	103663827	103675774	2	9069	19479.6	2391.79	KLF10		KLF10	1838	0
3_MACS_peak_19474_lociStitched	chr22	50047469	50061417	3	6987	18504.8	1422.7	C22orf34		C22orf34	1839	0
MACS_peak_4333	chr11	9683545	9689602	1	6058	18145	1087.84	SWAP70		SWAP70	1840	0
7_MACS_peak_17087_lociStitched	chr2	217381591	217405140	7	14506	19230.1	2180.64		RPL37A	RPL37A	1841	0
1_MACS_peak_26606_lociStitched	chr7	84918036	84924322	1	6287	18909.5	1861.91			SEMA3D	1842	0
1_MACS_peak_14120_lociStitched	chr19	18057860	18064135	1	6276	18092.7	1049.81	KCNN1	CCDC124,ARRDC2	KCNN1	1843	0
4_MACS_peak_28390_lociStitched	chr8	134570031	134594846	4	12076	22068	5044.89	ST3GAL1		ST3GAL1	1844	0
MACS_peak_28230	chr8	117881885	117887867	1	5983	19427.1	2413.14	NCRNA00255,RAD21,MIR3610		NCRNA00255	1845	0
1_MACS_peak_1466_lociStitched	chr1	110161085	110168928	1	7844	18141.6	1127.82	AMPD2	GSTM2,GSTM4,GNAT2,MIR197	AMPD2	1846	0
MACS_peak_24447	chr6	27104423	27110345	1	5923	18388.4	1382.19	HIST1H4I,HIST1H2BK	HIST1H2AG,HIST1H2AH,MIR3143,HIST1H2BJ	HIST1H4I	1847	0
2_MACS_peak_25059_lociStitched	chr6	88845240	88854412	2	6048	18861.3	1870.17	CNR1	CNR1	CNR1	1848	0
1_MACS_peak_22089_lociStitched	chr4	103744173	103750962	1	6790	18698.9	1708.79	UBE2D3	CISD2,UBE2D3	UBE2D3	1849	0
1_MACS_peak_7721_lociStitched	chr13	111564374	111569201	1	4828	18671.8	1718.41	ANKRD10	C13orf29	ANKRD10	1850	0
4_MACS_peak_16523_lociStitched	chr2	137132668	137152959	4	12113	19432.7	2495.79			CXCR4	1851	0
2_MACS_peak_5170_lociStitched	chr11	85953958	85963187	2	8644	20422.9	3499.64	EED		EED	1852	0
3_MACS_peak_17233_lociStitched	chr2	231273669	231284335	3	7016	18963.1	2041.47	SP100		SP100	1853	0
1_MACS_peak_27312_lociStitched	chr7	155436003	155439756	1	3754	18139.4	1217.85	RBM33		RBM33	1854	0
1_MACS_peak_26617_lociStitched	chr7	87101776	87106390	1	4615	18622.1	1708.1	ABCB4	ABCB4	ABCB4	1855	0
3_MACS_peak_2823_lociStitched	chr1	235096318	235120683	3	9921	19898.9	2992.02			SNORA14B	1856	0
5_MACS_peak_18379_lociStitched	chr21	34665975	34682391	5	12352	18955.6	2048.72	IL10RB	IFNAR1	IFNAR1	1857	0
2_MACS_peak_22499_lociStitched	chr4	175730902	175751911	2	9131	19565.7	2684.95	GLRA3	GLRA3	GLRA3	1858	0
1_MACS_peak_5056_lociStitched	chr11	74490232	74496260	1	6029	18753.7	1889.78	RNF169	CHRDL2	RNF169	1859	0
1_MACS_peak_13198_lociStitched	chr18	45454252	45458990	1	4739	18070.3	1214.35	SMAD2		SMAD2	1860	0
5_MACS_peak_14197_lociStitched	chr19	19515696	19539440	5	14806	19676.7	2820.79	GATAD2A		GATAD2A	1861	0
3_MACS_peak_24545_lociStitched	chr6	31169551	31184625	3	5447	18715.9	1866.16	HCG27	POU5F1,TCF19,PSORS1C3,CCHCR1	HCG27	1862	0
MACS_peak_24413	chr6	26054045	26058672	1	4628	18167.5	1333.04	HIST1H1C	HIST1H3B,HIST1H1A,HIST1H4A,HFE,HIST1H3C,HIST1H4B,HIST1H2AB,HIST1H1T,HIST1H3A,HIST1H2BB,HIST1H4C	HIST1H1C	1863	0
MACS_peak_5822	chr12	10558743	10565179	1	6437	18119.3	1292.99	KLRC4,KLRC3	KLRK1,KLRC2,KLRC1	KLRC4	1864	0
3_MACS_peak_2242_lociStitched	chr1	179840365	179858473	3	10768	20436.7	3610.74	TOR1AIP2,TOR1AIP1	TOR1AIP2	TOR1AIP1	1865	0
1_MACS_peak_5141_lociStitched	chr11	82865935	82873704	1	7770	18886.4	2065	PCF11	ANKRD42	PCF11	1866	0
2_MACS_peak_26097_lociStitched	chr7	30358667	30371253	2	7156	20040.7	3220.76	ZNRF2	MIR550A1,MIR550B1,DKFZP586I1420	MIR550B1	1867	0
2_MACS_peak_8547_lociStitched	chr14	91744450	91753597	2	9004	18638.8	1825.74	CCDC88C	GPR68	GPR68	1868	0
2_MACS_peak_12832_lociStitched	chr17	79213026	79227602	2	6784	18574.2	1763.7	C17orf89,SLC38A10	AZI1,C17orf56	C17orf89	1869	0
3_MACS_peak_20840_lociStitched	chr3	142699901	142722584	3	7592	21934.5	5142.24	SR140,LOC100289361	PAQR9	LOC100289361	1870	0
3_MACS_peak_4920_lociStitched	chr11	66565154	66571842	3	5715	17881.7	1093.49	C11orf80	RCE1	RCE1	1871	0
2_MACS_peak_17111_lociStitched	chr2	218653905	218665882	2	10363	18539.2	1761.82	TNS1	DIRC3	DIRC3	1872	0
MACS_peak_26713	chr7	98976361	98980586	1	4226	17905.1	1128.92	ARPC1B	BUD31,PDAP1	ARPC1B	1873	0
3_MACS_peak_6512_lociStitched	chr12	80318600	80330234	3	9230	18399.2	1627.6	PPP1R12A	PPP1R12A	PPP1R12A	1874	0
1_MACS_peak_28679_lociStitched	chr9	14687469	14694281	1	6813	18549.8	1802.46	ZDHHC21	CER1	ZDHHC21	1875	0
3_MACS_peak_6303_lociStitched	chr12	56511457	56524061	3	8417	18725.8	1985.13	ZC3H10,RPL41,ESYT1	ESYT1,MYL6,ERBB3,RPL41,PA2G4,MYL6B	ESYT1	1876	0
1_MACS_peak_3732_lociStitched	chr10	90142742	90149886	1	7145	17607.8	875.14	RNLS		RNLS	1877	0
2_MACS_peak_19594_lociStitched	chr3	9436670	9448123	2	9928	18866.5	2172.63	SETD5,LOC440944	THUMPD3	SETD5	1878	0
4_MACS_peak_26471_lociStitched	chr7	69869381	69892112	4	11518	21878.6	5187.21	AUTS2		WBSCR17	1879	0
2_MACS_peak_29700_lociStitched	chr9	135255659	135262077	2	6406	17958.2	1269.48	TTF1	SETX,C9orf171	TTF1	1880	0
1_MACS_peak_6134_lociStitched	chr12	49523476	49527870	1	4395	17798.8	1124.86	TUBA1B	LMBR1L,DHH	TUBA1B	1881	0
9_MACS_peak_4195_lociStitched	chr11	310073	356742	9	15795	20436.4	3770.86	IFITM3,IFITM1	ATHL1,B4GALNT4,IFITM5,PKP3,NLRP6,IFITM2	IFITM3	1882	0
2_MACS_peak_15183_lociStitched	chr2	10540684	10555645	2	9007	18420	1756.42	HPCAL1	ODC1,SNORA80B	SNORA80B	1883	0
3_MACS_peak_17774_lociStitched	chr20	34355522	34365718	3	7923	17843	1235.76	PHF20	RBM39	PHF20	1884	0
4_MACS_peak_20158_lociStitched	chr3	49376464	49390490	4	9736	17890.2	1296	USP4	GPX1	USP4	1885	0
1_MACS_peak_26911_lociStitched	chr7	107382422	107387755	1	5334	18303.4	1711.89	CBLL1	CBLL1	CBLL1	1886	0
3_MACS_peak_3288_lociStitched	chr10	32654903	32669110	3	6465	19107	2535.95		EPC1	EPC1	1887	0
MACS_peak_130	chr1	6658940	6664806	1	5867	17612.1	1044.15	KLHL21	NOL9,TAS1R1,THAP3,PHF13,ZBTB48	KLHL21	1888	0
2_MACS_peak_14779_lociStitched	chr19	49126531	49142490	2	7587	18123	1562.39	SPHK2,CA11,SEC1,DBP	SULT2B1,RPL18,FAM83E,NTN5,SPACA4	DBP	1889	0
MACS_peak_1696	chr1	149801616	149806802	1	5187	18830.4	2280.28	HIST2H4B	HIST2H3D,HIST2H2BF,HIST2H2BC,FCGR1A,HIST2H3C,HIST2H2AA3	HIST2H4B	1890	0
MACS_peak_1701	chr1	149830143	149835329	1	5187	18829.8	2280.28	HIST2H4B	HIST2H2BF,BOLA1,HIST2H3D,HIST2H2BE,HIST2H2BC,HIST2H2AB,HIST2H2AC,HIST2H3C,HIST2H2AA3	HIST2H2BC	1891	0
3_MACS_peak_5736_lociStitched	chr12	7045668	7063311	3	10478	18886.8	2348.28	PTPN6,ATN1,C12orf57	SCARNA12,PHB2,LRRC23,EMG1,MIR141,ENO2,MIR200C	PTPN6	1892	0
MACS_peak_16450	chr2	131107761	131114601	1	6841	17338	801.648	PTPN18	IMP4,CCDC115,PTPN18	PTPN18	1893	0
3_MACS_peak_28738_lociStitched	chr9	29421048	29449478	3	8976	19824.2	3314.94			MIR873	1894	0
3_MACS_peak_24796_lociStitched	chr6	41691215	41703782	3	8869	18536.3	2035.85	TFEB	FRS3,PRICKLE4,PGC	TFEB	1895	0
MACS_peak_15855	chr2	70348034	70355926	1	7893	17872.2	1377.94	LOC100133985	PCBP1,LOC400960	LOC100133985	1896	0
3_MACS_peak_15121_lociStitched	chr2	6935542	6961743	3	9913	19750.3	3259.4		CMPK2	CMPK2	1897	0
2_MACS_peak_5241_lociStitched	chr11	102415925	102433205	2	7129	20093.2	3606.34		MMP7	MMP7	1898	0
3_MACS_peak_9011_lociStitched	chr15	41046506	41058364	3	8088	17877.1	1400.43	GCHFR,FAM82A2	C15orf62,ZFYVE19,DNAJC17	GCHFR	1899	0
3_MACS_peak_20811_lociStitched	chr3	141102186	141131850	3	10340	23348.5	6882.05	ZBTB38		ZBTB38	1900	0
1_MACS_peak_12241_lociStitched	chr17	47434596	47440836	1	6241	17872.6	1421.47	ZNF652		ZNF652	1901	0
6_MACS_peak_28646_lociStitched	chr9	6680201	6717064	6	11166	19544.8	3118.61		KDM4C,GLDC	KDM4C	1902	0
1_MACS_peak_23260_lociStitched	chr5	111091090	111095767	1	4678	17444.3	1020.52	C5orf13		C5orf13	1903	0
1_MACS_peak_2683_lociStitched	chr1	226183999	226191100	1	7102	17732.6	1311.55	C1orf55		C1orf55	1904	0
1_MACS_peak_2100_lociStitched	chr1	167902983	167908744	1	5762	17679.4	1311.78	BRP44,DCAF6	DCAF6,ADCY10	DCAF6	1905	0
4_MACS_peak_23608_lociStitched	chr5	139119571	139145850	4	11173	18889.3	2530.67		PSD2	PSD2	1906	0
6_MACS_peak_14273_lociStitched	chr19	28956599	28980639	6	13705	19313.7	2956.92			LOC148145	1907	0
4_MACS_peak_10544_lociStitched	chr16	29656090	29688185	4	9367	18387.2	2047.66	SPN	QPRT,SLC7A5P1	SPN	1908	0
1_MACS_peak_9236_lociStitched	chr15	56532560	56538703	1	6144	17693.1	1355.15	RFX7		RFX7	1909	0
7_MACS_peak_29914_lociStitched	chrX	2608998	2632619	7	13159	18927.5	2603.03	CD99	XG,XGPY2	CD99	1910	0
3_MACS_peak_14037_lociStitched	chr19	16180271	16190532	3	8269	17565.8	1255.95	TPM4	FLJ25328,RAB8A	TPM4	1911	0
3_MACS_peak_3515_lociStitched	chr10	71883185	71907467	3	9602	18738.4	2430.63	AIFM2,TYSND1	SAR1A,AIFM2	AIFM2	1912	0
1_MACS_peak_12117_lociStitched	chr17	43298423	43305490	1	7068	17157.3	850.867	FMNL1	LOC100133991,C17orf46	FMNL1	1913	0
1_MACS_peak_838_lociStitched	chr1	37939353	37946033	1	6681	17520.3	1216.43	ZC3H12A	MEAF6	ZC3H12A	1914	0
1_MACS_peak_22903_lociStitched	chr5	56108890	56115690	1	6801	17799.7	1513	MAP3K1		MAP3K1	1915	0
2_MACS_peak_15778_lociStitched	chr2	65525036	65530855	2	5288	17061.9	782.655			SPRED2	1916	0
2_MACS_peak_16077_lociStitched	chr2	89932467	89954459	2	10365	21677.5	5401.24			ANKRD36BP2	1917	0
2_MACS_peak_18496_lociStitched	chr21	43480423	43487350	2	5712	17345.2	1071.61	UMODL1	C21orf121,ZNF295,UMODL1,C21orf128	UMODL1	1918	0
3_MACS_peak_25575_lociStitched	chr6	157185870	157208186	3	10512	19107	2838.6	ARID1B		ARID1B	1919	0
3_MACS_peak_26493_lociStitched	chr7	72932815	72942109	3	7954	18103.8	1868.09	BAZ1B	BCL7B	BAZ1B	1920	0
3_MACS_peak_13984_lociStitched	chr19	14182578	14203663	3	9533	18618.1	2388.93	PRKACA,SAMD1,LOC113230	PALM3,ASF1B,IL27RA,RLN3	SAMD1	1921	0
2_MACS_peak_24828_lociStitched	chr6	42785716	42791007	2	5238	17339.7	1120.63	KIAA0240		KIAA0240	1922	0
1_MACS_peak_21185_lociStitched	chr3	186368221	186372770	1	4550	17535	1341.05	FETUB	AHSG,HRG	FETUB	1923	0
2_MACS_peak_9926_lociStitched	chr15	100103905	100119666	2	9242	18687.8	2532.79	MEF2A	MEF2A	MEF2A	1924	0
1_MACS_peak_21261_lociStitched	chr3	190332137	190337325	1	5189	18375.4	2224.61	IL1RAP		IL1RAP	1925	0
2_MACS_peak_14536_lociStitched	chr19	41767632	41774001	2	6325	17137.7	992.927	HNRNPUL1,AXL	CCDC97	HNRNPUL1	1926	0
1_MACS_peak_17143_lociStitched	chr2	220141485	220145677	1	4193	17003.6	870.259	DNAJB2	ANKZF1,GLB1L,STK16,ATG9A,MIR153-1,TUBA4B,TUBA4A,PTPRN	DNAJB2	1927	0
1_MACS_peak_8977_lociStitched	chr15	40288238	40293406	1	5169	17420.3	1288.38	EIF2AK4	SRP14	SRP14	1928	0
2_MACS_peak_1149_lociStitched	chr1	62896577	62907155	2	7861	17923.4	1791.91	USP1	USP1	USP1	1929	0
2_MACS_peak_11415_lociStitched	chr17	4847076	4854417	2	6871	17084	955.064	ENO3,RNF167,PFN1	CAMTA2,C17orf107,SLC25A11,CHRNE,GP1BA,INCA1,KIF1C,SPAG7,ENO3	PFN1	1930	0
2_MACS_peak_27541_lociStitched	chr8	23074843	23085055	2	8900	17177.6	1048.77	TNFRSF10A,LOC389641	CHMP7	TNFRSF10A	1931	0
1_MACS_peak_23890_lociStitched	chr5	162885141	162891267	1	6127	17432.8	1310.35	NUDCD2,HMMR	CCNG1,MAT2B	HMMR	1932	0
MACS_peak_9105	chr15	44065976	44070468	1	4493	16804.1	696.26	ELL3	CATSPER2P1,MIR1282,MFAP1,SERF2,WDR76,C15orf63,PDIA3,SERINC4	ELL3	1933	0
1_MACS_peak_21054_lociStitched	chr3	178864396	178868467	1	4072	17624.6	1523.37	PIK3CA		PIK3CA	1934	0
6_MACS_peak_28586_lociStitched	chr9	673504	695275	6	11347	18459.6	2359.98	KANK1	KANK1	KANK1	1935	0
3_MACS_peak_16816_lociStitched	chr2	179958781	179970289	3	8441	17962.8	1876.95	SESTD1	CCDC141	CCDC141	1936	0
2_MACS_peak_20863_lociStitched	chr3	149525664	149534054	2	5859	18291.9	2216.64	RNF13	C3orf16	RNF13	1937	0
3_MACS_peak_11718_lociStitched	chr17	27465458	27478297	3	7531	17904	1832.13	MYO18A	MYO18A	MYO18A	1938	0
4_MACS_peak_15619_lociStitched	chr2	54317625	54336207	4	14200	18866.3	2804.02		ACYP2	ACYP2	1939	0
3_MACS_peak_10862_lociStitched	chr16	68017224	68040733	3	8838	18017.3	1955.95	DPEP2	SLC12A4,PSMB10,DUS2L,DPEP3,DDX28,LCAT	DPEP2	1940	0
3_MACS_peak_28283_lociStitched	chr8	124397172	124410365	3	9780	19073.1	3022.52	ATAD2	WDYHV1	ATAD2	1941	0
2_MACS_peak_25896_lociStitched	chr7	7594140	7610200	2	5756	17516.6	1480.73	MIOS	COL28A1	MIOS	1942	0
2_MACS_peak_6092_lociStitched	chr12	47748805	47756883	2	6706	17357.2	1322.37			LOC100233209	1943	0
2_MACS_peak_4363_lociStitched	chr11	10463045	10481596	2	8227	19089	3055.35	AMPD3	MTRNR2L8,AMPD3	AMPD3	1944	0
1_MACS_peak_19995_lociStitched	chr3	40753879	40761406	1	7528	17556	1524.97			ZNF621	1945	0
2_MACS_peak_393_lociStitched	chr1	19716100	19722524	2	6197	17083.3	1056.11	CAPZB		PQLC2	1946	0
2_MACS_peak_7303_lociStitched	chr13	40687667	40703768	2	7621	19269.7	3247.57			FLJ42392	1947	0
4_MACS_peak_15602_lociStitched	chr2	48540316	48560206	4	11496	19269.4	3248.04	FOXN2		FOXN2	1948	0
1_MACS_peak_4873_lociStitched	chr11	65624070	65629251	1	5182	16827.4	822.225	CFL1,MUS81	SNX32,CCDC85B,CTSW,EFEMP2,FIBP,FOSL1	CFL1	1949	0
7_MACS_peak_22557_lociStitched	chr4	185234220	185270612	7	16747	19375.1	3373.54			ENPP6	1950	0
2_MACS_peak_4532_lociStitched	chr11	45950301	45961634	2	8377	17759.9	1769.08	GYLTL1B,PHF21A	MAPK8IP1,PEX16,C11orf94	GYLTL1B	1951	0
1_MACS_peak_17059_lociStitched	chr2	212790892	212797320	1	6429	17504.7	1514.44	ERBB4		MIR548F2	1952	0
2_MACS_peak_11927_lociStitched	chr17	37352033	37367623	2	10305	18118.7	2142.07	CACNB1,RPL19,STAC2	PLXDC1,ARL5C	RPL19	1953	0
2_MACS_peak_24977_lociStitched	chr6	71995646	72001924	2	6259	17083.7	1118.11	OGFRL1		OGFRL1	1954	0
3_MACS_peak_12197_lociStitched	chr17	45725623	45742546	3	8229	18171.9	2211.84	KPNB1	TBKBP1	KPNB1	1955	0
2_MACS_peak_21815_lociStitched	chr4	71596826	71603671	2	6448	17465.7	1508.64	RUFY3	UTP3	RUFY3	1956	0
3_MACS_peak_5351_lociStitched	chr11	116822877	116834751	3	11771	18149.4	2197.88	SIK3		APOA1	1957	0
1_MACS_peak_16755_lociStitched	chr2	174826334	174831678	1	5345	17121.6	1170.87	SP3		SP3	1958	0
3_MACS_peak_17107_lociStitched	chr2	217521479	217532079	3	10557	17539.8	1594.24	IGFBP2	IGFBP5	IGFBP2	1959	0
1_MACS_peak_15873_lociStitched	chr2	71290535	71300457	1	9923	17782.2	1848.47	NAGK	OR7E91P	NAGK	1960	0
3_MACS_peak_27953_lociStitched	chr8	71544576	71565265	3	7498	18789.7	2863.36	LACTB2	TRAM1,XKR9	LACTB2	1961	0
5_MACS_peak_26302_lociStitched	chr7	51835714	51858416	5	11094	20116.2	4199.87			COBL	1962	0
3_MACS_peak_21119_lociStitched	chr3	182825491	182834834	3	5012	17920.8	2012.48		MCCC1,LAMP3	MCCC1	1963	0
2_MACS_peak_19835_lociStitched	chr3	29446445	29456206	2	8445	17849.9	1942.44	RBMS3		RBMS3	1964	0
3_MACS_peak_18015_lociStitched	chr20	46349227	46365448	3	8517	17768.5	1876.77	SULF2		SULF2	1965	0
1_MACS_peak_29323_lociStitched	chr9	115247752	115253391	1	5640	17125.1	1236.07	KIAA1958		KIAA1958	1966	0
2_MACS_peak_17050_lociStitched	chr2	211031405	211038142	2	6500	17411.8	1523.91	C2orf67		C2orf67	1967	0
2_MACS_peak_12985_lociStitched	chr18	9474471	9483830	2	6038	18847.2	2960.25	RALBP1		RALBP1	1968	0
3_MACS_peak_29403_lociStitched	chr9	123336139	123350606	3	9677	17286.6	1400.41	CDK5RAP2	CDK5RAP2	CDK5RAP2	1969	0
1_MACS_peak_26959_lociStitched	chr7	112576692	112581614	1	4923	17905.7	2028.85	C7orf60		C7orf60	1970	0
1_MACS_peak_8496_lociStitched	chr14	83819528	83824780	1	5253	16921.9	1047.25				1971	0
2_MACS_peak_3237_lociStitched	chr10	27144990	27150717	2	5403	17439.9	1565.76	ABI1	ABI1	ABI1	1972	0
MACS_peak_26232	chr7	45037637	45042967	1	5331	17398.2	1534.51	CCM2	CCM2,C7orf40,SNORA9,MYO1G	CCM2	1973	0
5_MACS_peak_28596_lociStitched	chr9	858075	900401	5	11208	19652	3796.64	DMRT1		DMRT1	1974	0
1_MACS_peak_7541_lociStitched	chr13	62781420	62785784	1	4365	17124.8	1277.78			PCDH20	1975	0
2_MACS_peak_9643_lociStitched	chr15	75740761	75749202	2	7818	17227.2	1388.54	SIN3A		SIN3A	1976	0
2_MACS_peak_24303_lociStitched	chr6	14655204	14665946	2	10318	17308.6	1479.17			CD83	1977	0
2_MACS_peak_17465_lociStitched	chr20	3775799	3793179	2	7862	17458.2	1631.98	CDC25B	CDC25B,C20orf29,C20orf27,SPEF1,MAVS,CENPB	CDC25B	1978	0
3_MACS_peak_6700_lociStitched	chr12	106679377	106698780	3	9188	17165.8	1342.69	TCP11L2	CKAP4	TCP11L2	1979	0
2_MACS_peak_9055_lociStitched	chr15	42218335	42230690	2	9112	17605.9	1782.83	EHD4	SPTBN5	SPTBN5	1980	0
2_MACS_peak_15707_lociStitched	chr2	61750979	61767196	2	7980	18453.3	2641.75	XPO1		XPO1	1981	0
3_MACS_peak_12263_lociStitched	chr17	48222730	48247068	3	10362	18197.5	2387.56	PPP1R9B,SGCA	COL1A1,HILS1,SAMD14	PPP1R9B	1982	0
5_MACS_peak_8169_lociStitched	chr14	61529695	61557622	5	13697	18498.8	2689.37	SLC38A6		SLC38A6	1983	0
4_MACS_peak_7244_lociStitched	chr13	31181748	31202169	4	9731	18936.4	3130.54	USPL1		USPL1	1984	0
1_MACS_peak_23823_lociStitched	chr5	157935926	157942440	1	6515	16818.5	1025.3			EBF1	1985	0
2_MACS_peak_1024_lociStitched	chr1	46147776	46154942	2	6455	17404.1	1618.8	TMEM69,GPBP1L1	RPS15AP10	GPBP1L1	1986	0
3_MACS_peak_1108_lociStitched	chr1	54290018	54305214	3	8647	17972.3	2191.26	TMEM48	TMEM48	TMEM48	1987	0
3_MACS_peak_26150_lociStitched	chr7	37349182	37359294	3	9545	18204.6	2434.97	ELMO1		ELMO1	1988	0
1_MACS_peak_23436_lociStitched	chr5	127413404	127422319	1	8916	17389.6	1629.66	FLJ33630,SLC12A2		FLJ33630	1989	0
1_MACS_peak_25774_lociStitched	chr7	2076541	2081868	1	5328	16858.9	1102.69	MAD1L1		MAD1L1	1990	0
3_MACS_peak_2120_lociStitched	chr1	169842574	169864287	3	8310	18788.3	3033.31	SCYL3	SCYL3	SCYL3	1991	0
1_MACS_peak_7981_lociStitched	chr14	40587957	40594083	1	6127	17110.5	1361.2			FBXO33	1992	0
2_MACS_peak_2378_lociStitched	chr1	199004302	199013667	2	7572	17288.7	1542.42			MIR181A1	1993	0
3_MACS_peak_16640_lociStitched	chr2	159638567	159661286	3	9712	18999.9	3273.81	DAPL1		DAPL1	1994	0
3_MACS_peak_1541_lociStitched	chr1	114399841	114416997	3	9958	18195.7	2496.2	PTPN22	DCLRE1B,BCL2L15,RSBN1,AP4B1,PTPN22	PTPN22	1995	0
3_MACS_peak_23928_lociStitched	chr5	172260302	172278068	3	9908	17741.1	2051.97	ERGIC1		ERGIC1	1996	0
4_MACS_peak_16397_lociStitched	chr2	122391548	122408725	4	8042	17659.7	1989.1	CLASP1	CLASP1	CLASP1	1997	0
MACS_peak_13956	chr19	13212091	13217409	1	5319	16863.9	1197.61	TRMT1,LYL1	IER2,NACC1,TRMT1,STX10	LYL1	1998	0
[truncated: 10,655 more rows]
